# Supplementary material for: Requirement of DNMT1 to orchestrate epigenomic reprogramming for NPM-ALK–driven lymphomagenesis
Source: Life Sci Alliance. 2020 Dec 11;4(2):e202000794. doi: 10.26508/lsa.202000794 (PMC7768196; doi:10.26508/lsa.202000794)
Supplement: Supplementary file 1 [file LSA-2020-00794_TableS1.xlsx]

## Sheet: DEGs_Dereg_ALKvsCTRL_padj05_F
	Table S1. Gene list of significantly deregulated genes (FDR < 0.05, absolute log2(FC) > 1) between ALK tumors and Ctrl samples. The table shows the official gene symbol, the ENSEMBLE gene ID, the mean of normalized counts of all samples (baseMean), log2 fold change, log fold change standard error (lfcSE), Wald statistics (stat), the P-value and the false discovery rate-adjusted P-value (FDR).
	gene symbol	ENSEMBLE gene ID	baseMean	log2FoldChange	lfcSE	stat	pvalue	FDR
1	Cav2	ENSMUSG00000000058.6	238.673	-1.46032	0.60981	-2.40256	0.0162808	0.0497105
2	Klf6	ENSMUSG00000000078.6	1608.56	-1.57325	0.312542	-5.03472	4.78548e-07	7.2325e-06
3	Wnt3	ENSMUSG00000000125.5	4.04312	-2.61323	0.919844	-3.02304	0.00250247	0.0109386
4	Ccnd2	ENSMUSG00000000184.12	2053.98	-3.88031	0.481664	-8.07843	6.56084e-16	6.42535e-14
5	Scnn1g	ENSMUSG00000000216.8	47.7992	-3.44252	0.807727	-4.22707	2.36751e-05	0.000217506
6	Mid2	ENSMUSG00000000266.11	174.628	-1.73629	0.29351	-5.91543	3.31017e-09	8.77351e-08
7	Dgke	ENSMUSG00000000276.11	2949.75	-1.9487	0.410253	-4.75205	2.01361e-06	2.60436e-05
8	Itgb2	ENSMUSG00000000290.13	4400.35	-1.18034	0.233486	-5.05558	4.29081e-07	6.58653e-06
9	Tpd52l1	ENSMUSG00000000296.8	19.511	-2.21981	0.608891	-3.60118	0.000316772	0.00196847
10	Cdh4	ENSMUSG00000000305.12	327.12	-5.83098	0.630361	-8.8769	6.87469e-19	1.05199e-16
11	Ckmt1	ENSMUSG00000000308.14	38.484	-2.67276	0.685701	-3.88776	0.000101174	0.000747528
12	Arvcf	ENSMUSG00000000325.15	599.884	-1.29911	0.446135	-2.91314	0.00357819	0.0146685
13	Ccm2	ENSMUSG00000000378.15	2915.98	-1.15548	0.146118	-7.90788	2.61819e-15	2.41898e-13
14	Tmprss2	ENSMUSG00000000385.7	57.3736	-3.80529	0.625666	-5.93438	2.94957e-09	7.92498e-08
15	Mx1	ENSMUSG00000000386.14	249.751	-2.26672	0.716411	-3.23783	0.00120442	0.00600125
16	Pparg	ENSMUSG00000000440.12	246.792	-2.01949	0.714545	-2.86679	0.00414653	0.016511
17	Gpa33	ENSMUSG00000000544.14	13.0132	-2.90202	0.700615	-3.92199	8.78221e-05	0.000662879
18	Sox9	ENSMUSG00000000567.5	69.4394	-2.26364	0.776912	-2.9504	0.00317359	0.0132851
19	Grm6	ENSMUSG00000000617.14	26.3323	-3.82536	0.746803	-4.40192	1.07295e-05	0.000110204
20	Myo18a	ENSMUSG00000000631.20	3389.08	-1.2771	0.231196	-5.52404	3.31297e-08	6.89597e-07
21	Sez6	ENSMUSG00000000632.13	4.77604	-2.61245	0.807502	-2.99814	0.00271629	0.0116879
22	Cd52	ENSMUSG00000000682.7	2010.32	-3.67174	0.536811	-6.87593	6.1585e-12	3.06159e-10
23	Dnmt3l	ENSMUSG00000000730.13	7.56015	-3.03022	0.856441	-3.33042	0.000867161	0.00456588
24	Aire	ENSMUSG00000000731.15	194.28	-3.05756	0.718529	-4.29548	1.74313e-05	0.000167448
25	Sult5a1	ENSMUSG00000000739.14	44.569	-1.9053	0.382842	-4.95546	7.21608e-07	1.03775e-05
26	Kcnn3	ENSMUSG00000000794.9	104.566	-3.84484	0.610713	-6.21408	5.16247e-10	1.64955e-08
27	Car4	ENSMUSG00000000805.18	38.1682	-2.41936	0.786437	-3.12616	0.00177106	0.00826537
28	Fasl	ENSMUSG00000000817.10	13.5967	-3.59765	0.772716	-4.00389	6.23095e-05	0.000496922
29	Bcl11a	ENSMUSG00000000861.15	191.678	-2.38954	0.747757	-3.31417	0.000919167	0.00479327
30	Il4	ENSMUSG00000000869.12	6.26354	-3.07793	0.825391	-3.29041	0.00100043	0.00513102
31	Wfdc18	ENSMUSG00000000983.13	91.8535	-4.0348	0.615525	-6.4666	1.00236e-10	3.76836e-09
32	S100a4	ENSMUSG00000001020.8	105.59	-1.52263	0.636097	-2.41435	0.0157634	0.0484857
33	S100a3	ENSMUSG00000001021.12	18.5917	-4.02497	0.737068	-4.55311	5.28584e-06	6.03343e-05
34	Icam2	ENSMUSG00000001029.15	1264.86	-1.13392	0.239554	-4.73373	2.20428e-06	2.81397e-05
35	Mxd1	ENSMUSG00000001156.9	825.626	-1.30242	0.322373	-4.04074	5.32818e-05	0.000436483
36	Oas1h	ENSMUSG00000001168.16	2.58328	-2.72384	0.945739	-2.88745	0.00388384	0.0156464
37	Lsr	ENSMUSG00000001247.16	162.44	-1.53293	0.626087	-2.45483	0.0140952	0.0443547
38	Gramd1a	ENSMUSG00000001248.14	4754.3	-2.25525	0.416445	-5.41788	6.03086e-08	1.17772e-06
39	Ckb	ENSMUSG00000001270.8	201.275	-1.24301	0.405596	-3.06662	0.00216491	0.00972349
40	Efnb2	ENSMUSG00000001300.16	165.255	-1.1182	0.23825	-4.69381	2.68158e-06	3.32642e-05
41	Sync	ENSMUSG00000001333.9	24.9037	-2.04435	0.741151	-2.79982	0.00511313	0.0197027
42	Tubb6	ENSMUSG00000001473.6	414.574	-1.33307	0.349301	-3.81616	0.000135547	0.000958467
43	Pax9	ENSMUSG00000001497.18	192.478	-2.6249	0.780921	-3.44963	0.000561356	0.0031963
44	Ell2	ENSMUSG00000001542.6	338.98	-2.23122	0.570549	-3.93458	8.33413e-05	0.000635177
45	Jup	ENSMUSG00000001552.14	1615.41	-2.18072	0.500136	-4.3668	1.26081e-05	0.000126758
46	Acap1	ENSMUSG00000001588.12	7405.69	-1.06125	0.271818	-3.90438	9.44669e-05	0.0007065
47	Tcea3	ENSMUSG00000001604.14	17.6607	-1.92417	0.592898	-3.21943	0.00128445	0.00631965
48	Hoxc11	ENSMUSG00000001656.3	4.16452	-3.30938	0.89135	-3.6863	0.000227535	0.00148558
49	Gstt1	ENSMUSG00000001663.10	91.7592	-1.75339	0.691142	-2.5666	0.01027	0.0343921
50	Gramd3	ENSMUSG00000001700.9	910.317	-1.94812	0.626609	-3.13342	0.00172782	0.00808284
51	Il16	ENSMUSG00000001741.12	5453.96	-1.56714	0.218193	-7.18263	6.83854e-13	4.05899e-11
52	Rin2	ENSMUSG00000001768.15	424.171	-1.30774	0.435935	-3.00415	0.00266328	0.0114928
53	Lrp3	ENSMUSG00000001802.16	53.1196	-1.94993	0.752567	-2.63936	0.00830634	0.0289598
54	Cpa3	ENSMUSG00000001865.2	65.7208	-3.63851	0.564606	-6.26817	3.65304e-10	1.21481e-08
55	Grik3	ENSMUSG00000001985.9	4.20882	-2.67986	0.887308	-3.20288	0.00136059	0.0066409
56	Gria3	ENSMUSG00000001986.16	187.253	-1.08788	0.433822	-2.51094	0.012041	0.0390671
57	Srpk3	ENSMUSG00000002007.5	66.9064	-2.87838	0.879609	-3.54501	0.000392596	0.00236027
58	Cd3g	ENSMUSG00000002033.14	6199.63	-1.79375	0.525241	-3.42024	0.000625649	0.00349532
59	Foxn1	ENSMUSG00000002057.4	284.264	-4.17693	0.735304	-5.8148	6.07056e-09	1.51857e-07
60	Bbc3	ENSMUSG00000002083.13	360.812	-1.81606	0.363767	-4.99333	5.93462e-07	8.72683e-06
61	Nr1h3	ENSMUSG00000002108.10	401.383	-1.56964	0.475068	-3.31079	0.000930335	0.00483586
62	Napsa	ENSMUSG00000002204.9	414.696	-2.22835	0.808525	-2.94329	0.00324746	0.0135538
63	Rmnd5a	ENSMUSG00000002222.14	19699.8	-1.82943	0.395614	-4.62612	3.72587e-06	4.42831e-05
64	Peg3	ENSMUSG00000002265.16	91.4623	-1.77983	0.596453	-3.00165	0.00268524	0.0115748
65	Irf9	ENSMUSG00000002325.14	1199.84	-1.21383	0.436612	-2.78245	0.00539507	0.0205881
66	Ncan	ENSMUSG00000002341.8	3.66274	-2.42207	0.97998	-2.64256	0.00822829	0.0287286
67	Slc25a42	ENSMUSG00000002346.16	678.137	-1.81816	0.322593	-5.63683	1.73204e-08	3.84207e-07
68	Snx9	ENSMUSG00000002365.9	333.797	-1.65668	0.421903	-3.93274	8.39818e-05	0.000639065
69	Dyrk1b	ENSMUSG00000002409.18	791.908	-1.0225	0.316587	-3.23001	0.00123788	0.00613676
70	Abhd3	ENSMUSG00000002475.15	31.39	-1.59512	0.54333	-2.93841	0.00329903	0.0137135
71	Scin	ENSMUSG00000002565.16	147.807	-4.44626	0.379187	-11.2678	1.89316e-29	8.62355e-27
72	Ikzf4	ENSMUSG00000002578.16	73.3043	-1.28807	0.449956	-2.86579	0.00415974	0.0165502
73	Pon1	ENSMUSG00000002588.12	73.7821	-4.30393	0.865198	-4.78922	1.67435e-06	2.19956e-05
74	Prkd1	ENSMUSG00000002688.8	60.8404	-2.34811	0.464174	-5.04248	4.59535e-07	6.98287e-06
75	Lcp2	ENSMUSG00000002699.13	4618.46	-1.31997	0.304345	-4.33757	1.44067e-05	0.000142015
76	Plin4	ENSMUSG00000002831.13	983.601	-2.73315	0.922837	-3.25671	0.00112713	0.00567097
77	Adgre5	ENSMUSG00000002885.14	3049.7	-2.20935	0.423252	-5.22504	1.74119e-07	2.97079e-06
78	Cd36	ENSMUSG00000002944.15	2467.62	-2.19549	0.743892	-3.00529	0.00265324	0.0114621
79	Relb	ENSMUSG00000002983.17	684.701	-2.40719	0.448033	-5.38175	7.37669e-08	1.40963e-06
80	Cdkn1b	ENSMUSG00000003031.14	3971.01	-1.09869	0.182556	-6.01835	1.76207e-09	5.01651e-08
81	Klf4	ENSMUSG00000003032.8	221.928	-2.28833	0.623565	-3.69008	0.000224185	0.00146909
82	Elf3	ENSMUSG00000003051.13	32.7636	-3.18181	0.681616	-4.58709	4.49463e-06	5.23091e-05
83	Lipe	ENSMUSG00000003123.15	1793.85	-2.37344	0.689566	-3.48459	0.000492898	0.00285633
84	Ebi3	ENSMUSG00000003206.6	59.1256	-2.56661	0.648515	-3.96484	7.34467e-05	0.000570647
85	Edar	ENSMUSG00000003227.4	51.2914	-3.92777	0.730217	-5.18365	2.1758e-07	3.62824e-06
86	Plag1	ENSMUSG00000003282.9	41.5595	-1.83674	0.460758	-3.98123	6.85605e-05	0.000537587
87	Ap1m2	ENSMUSG00000003309.14	126.929	-1.8532	0.559183	-3.32024	0.000899407	0.00470406
88	St8sia6	ENSMUSG00000003418.11	210.122	-2.96875	0.464607	-6.38103	1.75902e-10	6.24672e-09
89	Bicd1	ENSMUSG00000003452.15	60.966	-1.90068	0.585073	-3.25638	0.00112843	0.00567458
90	Inmt	ENSMUSG00000003477.5	38.8705	-3.11158	0.850077	-4.05277	5.06143e-05	0.000416898
91	Prodh	ENSMUSG00000003526.11	377.12	-1.67616	0.638848	-2.63384	0.00844259	0.0293201
92	Cp	ENSMUSG00000003617.16	419.639	-1.44449	0.555677	-2.61404	0.00894781	0.0308395
93	Calb2	ENSMUSG00000003657.9	3.42598	-2.96928	0.939755	-3.18258	0.00145967	0.00702988
94	Man1a	ENSMUSG00000003746.16	1998.68	-1.3175	0.41894	-3.14789	0.00164453	0.00775618
95	Nqo1	ENSMUSG00000003849.8	290.201	-3.64427	0.586109	-6.23789	4.43498e-10	1.44794e-08
96	Hlf	ENSMUSG00000003949.16	57.1388	-1.81232	0.715502	-2.57634	0.00998536	0.0336516
97	Brinp2	ENSMUSG00000004031.13	8.24513	-2.43358	0.807431	-2.87597	0.00402784	0.0161468
98	Cavin1	ENSMUSG00000004044.9	1088.41	-1.90557	0.592919	-3.22588	0.00125585	0.00620229
99	Cacna1b	ENSMUSG00000004113.18	50.8618	-4.17932	0.574322	-6.4801	9.16603e-11	3.4929e-09
100	Eno2	ENSMUSG00000004267.16	80.6045	-1.68577	0.482366	-3.49553	0.000473126	0.00275725
101	Il12b	ENSMUSG00000004296.14	71.4024	-4.61115	0.617198	-6.51608	7.21704e-11	2.81594e-09
102	Gpx6	ENSMUSG00000004341.7	2.6369	-2.18749	0.954391	-2.46993	0.0135141	0.0428943
103	9330159F19Rik	ENSMUSG00000004360.9	13.3844	-2.11183	0.898193	-2.44981	0.0142932	0.0448009
104	Sst	ENSMUSG00000004366.3	1.64077	-2.67148	0.960217	-2.64245	0.00823092	0.0287327
105	Ctse	ENSMUSG00000004552.16	1410.32	-1.62364	0.674637	-2.41898	0.0155641	0.0480008
106	Chn2	ENSMUSG00000004633.17	96.4583	-1.36279	0.477843	-2.85492	0.00430482	0.01701
107	Aqp1	ENSMUSG00000004655.5	1377.22	-2.13165	0.387538	-5.50541	3.68315e-08	7.5246e-07
108	Arid3b	ENSMUSG00000004661.15	902.454	-1.43327	0.303572	-4.722	2.33536e-06	2.95114e-05
109	Abca13	ENSMUSG00000004668.14	11.4524	-3.08422	0.874112	-3.77037	0.000163005	0.00112028
110	Ccl24	ENSMUSG00000004814.10	19.5423	-2.57634	0.709207	-3.57734	0.000347108	0.00213128
111	Grap	ENSMUSG00000004837.2	2422.76	-1.35927	0.278336	-4.88409	1.03907e-06	1.44959e-05
112	Mapk13	ENSMUSG00000004864.12	37.025	-1.77748	0.517995	-3.42455	0.000615809	0.00345018
113	Dtx2	ENSMUSG00000004947.15	747.093	-1.10667	0.184392	-6.00156	1.95433e-09	5.49994e-08
114	Hspb1	ENSMUSG00000004951.10	165.459	-2.14648	0.649829	-3.32649	0.000879485	0.00462207
115	Rasa4	ENSMUSG00000004952.13	372.357	-1.38912	0.51138	-2.71969	0.00653436	0.023932
116	Cstb	ENSMUSG00000005054.7	1749.16	-1.62752	0.2941	-5.53398	3.13053e-08	6.57211e-07
117	Slc1a2	ENSMUSG00000005089.15	36.2342	-3.7576	0.744532	-4.3867	1.15081e-05	0.000117156
118	Ripk4	ENSMUSG00000005251.14	140.454	-2.30856	0.521825	-4.43096	9.38159e-06	9.78994e-05
119	Cadm3	ENSMUSG00000005338.13	67.2048	-2.17213	0.619544	-3.52748	0.000419533	0.00249186
120	Mlxipl	ENSMUSG00000005373.13	232.434	-2.41006	0.88765	-2.92335	0.00346289	0.0142705
121	Mprip	ENSMUSG00000005417.17	7248.02	-1.16961	0.260324	-4.49301	7.0225e-06	7.65016e-05
122	Myl10	ENSMUSG00000005474.9	137.216	-2.35476	0.668566	-3.55192	0.000382429	0.00230979
123	Cyp2a5	ENSMUSG00000005547.14	47.3302	-5.18598	0.807221	-5.95974	2.52641e-09	6.92096e-08
124	Tmod4	ENSMUSG00000005628.12	29.0357	-1.27798	0.440031	-2.89862	0.00374805	0.0152192
125	Agrp	ENSMUSG00000005705.10	246.633	-1.51061	0.572277	-2.64413	0.0081901	0.0286317
126	Cd247	ENSMUSG00000005763.15	7073.96	-1.84549	0.277201	-6.65806	2.7746e-11	1.19969e-09
127	Sqor	ENSMUSG00000005803.14	388.8	-2.67472	0.478158	-5.59923	2.15304e-08	4.67534e-07
128	Tnfsf14	ENSMUSG00000005824.6	106.72	-2.48418	0.38015	-6.51513	7.2628e-11	2.82816e-09
129	Cnga2	ENSMUSG00000005864.7	4.39005	-2.82535	0.886694	-3.33676	0.000847618	0.00448281
130	Itgae	ENSMUSG00000005947.11	367.8	-2.91404	0.570872	-5.13123	2.87854e-07	4.67125e-06
131	P2rx5	ENSMUSG00000005950.14	51.0421	-3.01834	0.732056	-4.11993	3.78991e-05	0.000324729
132	Prss16	ENSMUSG00000006179.8	8686.96	-7.61584	0.629187	-12.3305	6.20461e-35	3.92031e-32
133	Actn3	ENSMUSG00000006457.3	95.7429	-3.58593	0.58146	-6.10826	1.00721e-09	3.01193e-08
134	Cryba2	ENSMUSG00000006546.3	3.14259	-2.78172	0.92111	-3.09851	0.00194493	0.00890784
135	Atp7b	ENSMUSG00000006567.11	90.1916	-3.57943	0.558995	-6.29417	3.09054e-10	1.04731e-08
136	Abhd1	ENSMUSG00000006638.14	173.263	-1.2062	0.293784	-4.10569	4.03112e-05	0.000341512
137	Tcf23	ENSMUSG00000006642.3	11.1529	-2.65459	0.955819	-3.23734	0.0012065	0.00600858
138	B4galnt1	ENSMUSG00000006731.10	2590.19	-1.11279	0.337924	-3.29376	0.000988561	0.00508347
139	Hap1	ENSMUSG00000006930.15	201.931	-2.95083	0.537821	-5.49434	3.92167e-08	7.9353e-07
140	P3h4	ENSMUSG00000006931.15	197.086	-2.79396	0.455571	-6.12849	8.87143e-10	2.69403e-08
141	Klk4	ENSMUSG00000006948.7	2.95695	-3.00202	0.902454	-3.31779	0.000907325	0.00474167
142	Vwa7	ENSMUSG00000007030.8	20.8092	-1.10694	0.449032	-2.46736	0.0136112	0.0431674
143	Atp1a2	ENSMUSG00000007097.14	1183.9	-3.07581	0.879574	-3.93826	8.20745e-05	0.000627476
144	Dennd2c	ENSMUSG00000007379.15	176.42	-1.21233	0.397869	-3.04729	0.00230916	0.0102325
145	Bcl2l1	ENSMUSG00000007659.18	2983.94	-2.7625	0.305927	-9.03118	1.69836e-19	2.81914e-17
146	Clstn3	ENSMUSG00000008153.11	278.429	-2.28585	0.824843	-2.89551	0.00378548	0.0153321
147	Spib	ENSMUSG00000008193.13	715.46	-2.59665	0.740447	-3.64432	0.000268098	0.00170606
148	Sertad1	ENSMUSG00000008384.8	391.804	-1.24247	0.335978	-3.69795	0.000217351	0.00142909
149	Fut1	ENSMUSG00000008461.6	23.6126	-2.96632	0.590678	-4.79475	1.62879e-06	2.14836e-05
150	Nfib	ENSMUSG00000008575.17	339.962	-1.74242	0.27955	-6.23369	4.55569e-10	1.48473e-08
151	Cldn13	ENSMUSG00000008843.4	7.6568	-3.45906	0.821814	-4.18698	2.82689e-05	0.000253179
152	Hdac5	ENSMUSG00000008855.17	755.554	-2.15602	0.203807	-10.5772	3.80256e-26	1.26239e-23
153	Prr29	ENSMUSG00000009210.10	50.2369	-1.46405	0.55788	-2.62861	0.00857353	0.0297168
154	Trpm5	ENSMUSG00000009246.14	20.5832	-4.87403	0.72779	-5.26741	1.38359e-07	2.44457e-06
155	Rarres2	ENSMUSG00000009281.6	389.792	-2.63733	0.786159	-3.4336	0.000595613	0.00335632
156	Trpm2	ENSMUSG00000009292.18	446.454	-1.7216	0.569369	-3.04004	0.00236545	0.0104419
157	Mpo	ENSMUSG00000009350.13	28.9946	-4.07734	0.745291	-4.63467	3.57502e-06	4.28019e-05
158	Lpo	ENSMUSG00000009356.12	95.1091	-6.18691	0.683744	-6.68949	2.23955e-11	9.87973e-10
159	Otog	ENSMUSG00000009487.10	12.5744	-2.57788	0.937821	-2.80938	0.00496367	0.0192103
160	Tex11	ENSMUSG00000009670.11	12.6925	-4.6882	0.774347	-5.43332	5.5314e-08	1.09107e-06
161	Pou6f1	ENSMUSG00000009739.16	1934.69	-2.37424	0.415594	-5.71655	1.08705e-08	2.55608e-07
162	Zmynd10	ENSMUSG00000010044.12	26.6277	-1.79006	0.409236	-4.34224	1.4104e-05	0.000139664
163	Hyal1	ENSMUSG00000010051.15	27.6858	-1.65548	0.60176	-2.75452	0.00587783	0.0220427
164	Slc47a1	ENSMUSG00000010122.14	44.6244	-3.82254	0.728065	-4.47665	7.58238e-06	8.16022e-05
165	Eya4	ENSMUSG00000010461.15	175.534	-1.57818	0.661205	-2.40292	0.0162646	0.0496763
166	Acaa1b	ENSMUSG00000010651.4	64.7306	-2.39544	0.801383	-3.02978	0.00244732	0.0107358
167	Plcd1	ENSMUSG00000010660.3	188.859	-2.14936	0.434962	-4.94246	7.71435e-07	1.10132e-05
168	Slc5a1	ENSMUSG00000011034.6	1.93899	-2.86446	0.953374	-2.85041	0.00436627	0.0172111
169	Scarf2	ENSMUSG00000012017.3	198.693	-2.12563	0.326988	-6.49704	8.19132e-11	3.15213e-09
170	Ubxn11	ENSMUSG00000012126.16	708.221	-2.17776	0.442876	-4.92154	8.58644e-07	1.21695e-05
171	Mogat1	ENSMUSG00000012187.13	13.1331	-2.52368	0.772546	-3.19598	0.00139358	0.00677322
172	Ehf	ENSMUSG00000012350.15	95.459	-2.55978	0.620252	-4.14417	3.41053e-05	0.0002965
173	Steap4	ENSMUSG00000012428.9	491.695	-2.14325	0.495826	-4.33141	1.48155e-05	0.000145532
174	Retn	ENSMUSG00000012705.16	206.1	-3.48383	0.894422	-4.37287	1.22622e-05	0.00012374
175	Lypd8	ENSMUSG00000013643.13	26.5742	-4.23983	0.818423	-4.61973	3.84235e-06	4.55019e-05
176	Blk	ENSMUSG00000014453.3	417.46	-3.97963	0.737065	-5.56966	2.55232e-08	5.43987e-07
177	Clec4f	ENSMUSG00000014542.3	5.18436	-2.67102	0.909361	-3.17277	0.0015099	0.00723623
178	Wdfy2	ENSMUSG00000014547.9	297.26	-1.1103	0.356273	-3.11931	0.00181275	0.0084198
179	Hoxa2	ENSMUSG00000014704.10	12.8961	-2.18044	0.571381	-3.67924	0.000233929	0.00152073
180	Elmo3	ENSMUSG00000014791.10	307.535	-1.90128	0.281189	-6.75887	1.39074e-11	6.39447e-10
181	Adamts13	ENSMUSG00000014852.16	16.1193	-2.88355	0.747806	-3.54169	0.000397572	0.00238069
182	Dnajb9	ENSMUSG00000014905.4	522.945	-1.13558	0.431269	-2.6353	0.00840623	0.0292391
183	Ptgds	ENSMUSG00000015090.13	11.4823	-3.41762	0.733691	-3.92788	8.56973e-05	0.000650098
184	Npdc1	ENSMUSG00000015094.16	141.444	-1.09214	0.423792	-2.57901	0.00990837	0.0334497
185	Lrrk1	ENSMUSG00000015133.17	526.414	-1.75357	0.532147	-3.30789	0.000940008	0.00487734
186	Aldh1a3	ENSMUSG00000015134.15	83.6329	-1.90769	0.757923	-2.54578	0.0109033	0.0360627
187	Cyp2j9	ENSMUSG00000015224.10	25.4437	-2.05943	0.528733	-3.86715	0.000110115	0.00080299
188	Gadd45b	ENSMUSG00000015312.9	268.053	-1.29055	0.503631	-2.56911	0.0101961	0.0341972
189	Pcolce2	ENSMUSG00000015354.8	40.645	-2.14657	0.449254	-4.74702	2.06434e-06	2.6619e-05
190	Cd48	ENSMUSG00000015355.13	956.754	-1.79516	0.51418	-3.49941	0.000466296	0.00272231
191	Cd83	ENSMUSG00000015396.3	1052.01	-3.49319	0.584692	-6.01203	1.83218e-09	5.18598e-08
192	Gzmb	ENSMUSG00000015437.4	16.4118	-3.23257	0.833736	-3.59853	0.000320018	0.00198486
193	Egfl8	ENSMUSG00000015467.14	94.1965	-1.45277	0.396157	-3.66348	0.000248813	0.00160154
194	Ppt2	ENSMUSG00000015474.16	98.5353	-1.38324	0.462808	-2.98827	0.00280561	0.0120196
195	Prrt1	ENSMUSG00000015476.6	2583.05	-1.83599	0.432875	-4.24202	2.21516e-05	0.000205534
196	Hivep2	ENSMUSG00000015501.10	2495.3	-1.70899	0.372806	-4.58642	4.50922e-06	5.24478e-05
197	Lpl	ENSMUSG00000015568.16	4299.67	-2.5634	0.766756	-3.43723	0.000587694	0.00332021
198	Rxrg	ENSMUSG00000015843.10	44.9928	-3.06896	0.780235	-3.95592	7.62401e-05	0.000590243
199	H2-M2	ENSMUSG00000016283.13	342.2	-3.69661	0.575922	-6.43206	1.25884e-10	4.63474e-09
200	Cd274	ENSMUSG00000016496.7	1031.77	-1.75274	0.233314	-7.51234	5.80815e-14	4.10701e-12
201	Sdc4	ENSMUSG00000017009.3	856.178	-1.97176	0.434288	-4.54355	5.5316e-06	6.27451e-05
202	Il13ra1	ENSMUSG00000017057.9	401.264	-1.38391	0.380602	-3.63867	0.000274053	0.0017383
203	Rnd3	ENSMUSG00000017144.8	171.209	-1.01953	0.424115	-2.40344	0.0162417	0.049637
204	Cntnap1	ENSMUSG00000017167.6	107.773	-2.77314	0.360305	-7.65324	1.95978e-14	1.53545e-12
205	Gsdma	ENSMUSG00000017204.4	4.07826	-2.52455	0.889006	-2.57111	0.0101374	0.0340469
206	Pyy	ENSMUSG00000017311.15	4.20105	-3.33371	0.88659	-3.72545	0.000194963	0.00130958
207	Cacnb4	ENSMUSG00000017412.15	21.8908	-1.89771	0.645629	-2.9387	0.00329591	0.0137034
208	Cd40	ENSMUSG00000017652.16	254.307	-3.3144	0.533128	-6.2213	4.93056e-10	1.59628e-08
209	Rhbdl3	ENSMUSG00000017692.8	246.084	-3.68595	0.398814	-9.19298	3.8209e-20	6.86605e-18
210	Wfdc2	ENSMUSG00000017723.11	55.4209	-2.09828	0.728456	-2.89854	0.00374905	0.0152192
211	Mmp9	ENSMUSG00000017737.2	386.826	-2.22341	0.553005	-4.02336	5.73738e-05	0.000465719
212	Spata25	ENSMUSG00000017767.3	30.8701	-3.9298	0.677356	-5.27529	1.32548e-07	2.3602e-06
213	Myo1c	ENSMUSG00000017774.19	2022.26	-1.42985	0.434278	-3.29489	0.000984593	0.00506706
214	Cadps2	ENSMUSG00000017978.18	55.0124	-3.01277	0.410269	-7.16895	7.55751e-13	4.4587e-11
215	Rac3	ENSMUSG00000018012.11	84.6361	-1.36996	0.470869	-2.90727	0.003646	0.0148997
216	Med13l	ENSMUSG00000018076.12	2682.49	-1.10729	0.371384	-2.9826	0.0028581	0.0122071
217	Hist1h2bc	ENSMUSG00000018102.4	264.361	-1.62231	0.304897	-5.32003	1.0375e-07	1.88862e-06
218	Gpx3	ENSMUSG00000018339.11	2908.91	-1.58475	0.587357	-2.71729	0.00658183	0.0240474
219	NA	ENSMUSG00000018451.6	16.0439	-1.72183	0.656903	-2.61177	0.00900758	0.0310127
220	Trpv2	ENSMUSG00000018507.16	1609.54	-1.47141	0.224354	-6.55855	5.43345e-11	2.16751e-09
221	Slc2a4	ENSMUSG00000018566.14	480.339	-2.99799	0.663848	-4.56735	4.93938e-06	5.69059e-05
222	Cldn7	ENSMUSG00000018569.12	24.0613	-2.1368	0.668174	-3.19056	0.00141997	0.00688046
223	Copz2	ENSMUSG00000018672.15	218.917	-2.82885	0.292857	-9.63741	5.55748e-22	1.23698e-19
224	Slc25a35	ENSMUSG00000018740.14	215.188	-1.42316	0.517642	-2.75376	0.00589156	0.0220792
225	Zbtb4	ENSMUSG00000018750.14	998.42	-1.19775	0.304667	-3.93228	8.41452e-05	0.000640059
226	Acsl1	ENSMUSG00000018796.13	2774.98	-2.34657	0.807661	-3.00896	0.00262142	0.0113521
227	Lsp1	ENSMUSG00000018819.10	5589.25	-5.00568	0.334306	-14.9732	1.09945e-50	1.53821e-47
228	Sfrp5	ENSMUSG00000018822.7	3.06382	-2.62164	0.92128	-2.96343	0.00304233	0.0128399
229	Wwc1	ENSMUSG00000018849.6	153.895	-2.58847	0.771874	-3.4355	0.000591469	0.00333768
230	Alox12e	ENSMUSG00000018907.10	261.11	-5.67618	0.679484	-8.08827	6.05171e-16	5.96383e-14
231	Csf2	ENSMUSG00000018916.5	6.28119	-3.43728	0.824295	-4.12832	3.6542e-05	0.000314852
232	Tm4sf5	ENSMUSG00000018919.10	45.0088	-4.0668	0.52791	-6.91659	4.62656e-12	2.35991e-10
233	Alox15	ENSMUSG00000018924.6	146.824	-3.69224	0.556549	-6.59924	4.13265e-11	1.71134e-09
234	Heatr9	ENSMUSG00000018925.3	11.3724	-2.59124	0.895604	-2.9837	0.00284785	0.0121659
235	E2f2	ENSMUSG00000018983.9	8773.14	-1.36478	0.317578	-4.29791	1.72416e-05	0.000165784
236	Rnf145	ENSMUSG00000019189.13	4750.72	-1.34492	0.216787	-6.20419	5.49783e-10	1.74815e-08
237	Scn1b	ENSMUSG00000019194.15	168.596	-1.48628	0.35428	-4.19642	2.71172e-05	0.000243868
238	Atp6v0a1	ENSMUSG00000019302.16	633.451	-2.12907	0.250552	-8.49659	1.95242e-17	2.39013e-15
239	Grb7	ENSMUSG00000019312.10	50.5381	-2.46013	0.382813	-6.3401	2.29618e-10	7.97436e-09
240	Aoc3	ENSMUSG00000019326.14	475.872	-2.33823	0.804593	-2.97807	0.00290066	0.0123485
241	Sec14l4	ENSMUSG00000019368.13	10.2172	-2.33652	0.889991	-2.74624	0.00602828	0.0224821
242	Cd70	ENSMUSG00000019489.7	4.81547	-3.15052	0.85853	-3.7187	0.00020025	0.0013405
243	Pdk4	ENSMUSG00000019577.6	1488.51	-3.01044	0.871343	-3.84003	0.000123017	0.000881644
244	Iyd	ENSMUSG00000019762.4	2.35172	-2.75035	0.922289	-2.96516	0.00302524	0.0127788
245	Rab32	ENSMUSG00000019832.4	248.638	-1.52756	0.422154	-3.62188	0.000292473	0.00183788
246	Tube1	ENSMUSG00000019845.8	1473.77	-2.08751	0.458457	-4.5568	5.19388e-06	5.93885e-05
247	Tnfaip3	ENSMUSG00000019850.11	2383.01	-1.25543	0.233875	-5.36819	7.95315e-08	1.50948e-06
248	Perp	ENSMUSG00000019851.8	795.154	-1.92838	0.77301	-2.52637	0.0115249	0.0377679
249	Nts	ENSMUSG00000019890.4	11.3334	-2.25482	0.637155	-3.44573	0.000569529	0.00323813
250	Dcn	ENSMUSG00000019929.16	1859.07	-1.47448	0.610117	-2.43187	0.015021	0.0467157
251	Rhobtb1	ENSMUSG00000019944.14	139.851	-2.09911	0.547569	-3.85439	0.000116019	0.00083948
252	Kitl	ENSMUSG00000019966.18	302.368	-2.24566	0.391071	-5.74348	9.27494e-09	2.20739e-07
253	Ifngr1	ENSMUSG00000020009.12	5150.91	-2.0066	0.39407	-5.09543	3.47945e-07	5.4917e-06
254	Vnn3	ENSMUSG00000020010.7	29.3501	-2.66621	0.533025	-4.90047	9.56091e-07	1.34204e-05
255	Cdk17	ENSMUSG00000020015.10	3315.29	-1.54907	0.272064	-5.69396	1.24124e-08	2.88059e-07
256	Fgd6	ENSMUSG00000020021.4	236.284	-1.03187	0.372323	-2.77277	0.00555815	0.0210861
257	Cry1	ENSMUSG00000020038.10	1143.34	-1.09676	0.215499	-5.0894	3.59202e-07	5.63757e-06
258	Btbd11	ENSMUSG00000020042.15	409.408	-1.38704	0.414057	-3.35101	0.000805178	0.00429962
259	Ascl1	ENSMUSG00000020052.9	54.723	-5.30903	0.731739	-5.7836	7.31196e-09	1.79924e-07
260	Dram1	ENSMUSG00000020057.2	364.793	-2.346	0.318864	-7.35467	1.91397e-13	1.24963e-11
261	Sycp3	ENSMUSG00000020059.9	17.0938	-2.28908	0.909012	-2.63437	0.00842947	0.0292894
262	Mybpc1	ENSMUSG00000020061.17	12.0092	-3.30207	0.690139	-3.93712	8.24646e-05	0.000629966
263	Slc5a8	ENSMUSG00000020062.7	11.9105	-2.36006	0.858679	-2.75696	0.0058341	0.0219123
264	Srgn	ENSMUSG00000020077.14	1595.36	-1.58132	0.396733	-3.989	6.63532e-05	0.00052448
265	Tbata	ENSMUSG00000020096.20	6228.84	-7.80072	0.612567	-12.8534	8.22756e-38	6.71472e-35
266	Sgpl1	ENSMUSG00000020097.14	3802.92	-1.83228	0.248174	-7.38341	1.54289e-13	1.02791e-11
267	Vsir	ENSMUSG00000020101.14	1717.44	-1.70429	0.381808	-4.46649	7.95134e-06	8.47811e-05
268	Slc16a7	ENSMUSG00000020102.15	91.7758	-2.23158	0.441761	-5.04589	4.5142e-07	6.88627e-06
269	Elane	ENSMUSG00000020125.7	5.5094	-2.27072	0.952936	-2.7534	0.00589792	0.0220926
270	Gabrp	ENSMUSG00000020159.8	17.9585	-2.54841	0.737759	-3.41065	0.000648074	0.00360517
271	Meis1	ENSMUSG00000020160.18	130.432	-2.58647	0.536002	-4.83188	1.35249e-06	1.81843e-05
272	Adora2a	ENSMUSG00000020178.6	448.709	-1.55002	0.467229	-3.32101	0.000896924	0.00469609
273	Slc36a2	ENSMUSG00000020264.5	485.369	-2.5146	0.923975	-3.18021	0.00147167	0.00708074
274	Rhbdf1	ENSMUSG00000020282.18	203.694	-1.39925	0.37964	-3.68538	0.000228364	0.0014895
275	Nsg2	ENSMUSG00000020297.10	5577.4	-3.7056	0.256029	-14.4731	1.79148e-47	2.1931e-44
276	Slc22a4	ENSMUSG00000020334.6	36.0681	-2.81409	0.817979	-3.50255	0.000460825	0.00269841
277	Cyfip2	ENSMUSG00000020340.16	6226.66	-1.40286	0.479694	-2.9274	0.00341814	0.0141188
278	Sgcd	ENSMUSG00000020354.15	133.619	-2.64459	0.755946	-3.57129	0.000355234	0.00217369
279	Ltc4s	ENSMUSG00000020377.14	51.2919	-2.20445	0.725895	-3.05596	0.00224339	0.0100038
280	Il13	ENSMUSG00000020383.1	18.5748	-4.5246	0.804411	-5.2671	1.38598e-07	2.44502e-06
281	Pdlim4	ENSMUSG00000020388.12	149.101	-1.85429	0.33424	-5.54463	2.94569e-08	6.2308e-07
282	Havcr2	ENSMUSG00000020399.14	175.644	-1.33952	0.504472	-2.66314	0.00774141	0.0273801
283	Tnip1	ENSMUSG00000020400.17	1723.06	-1.13921	0.194492	-5.85766	4.69441e-09	1.21145e-07
284	Fam71b	ENSMUSG00000020401.6	77.3857	-2.68612	0.487703	-5.47838	4.29243e-08	8.63202e-07
285	Fabp6	ENSMUSG00000020405.4	6.21559	-2.91204	0.90316	-3.0868	0.00202326	0.00917827
286	Hormad2	ENSMUSG00000020419.11	24.5047	-2.3685	0.734875	-3.22678	0.00125192	0.00618758
287	Btg2	ENSMUSG00000020423.6	8709.87	-1.61935	0.348294	-4.64988	3.32135e-06	4.03319e-05
288	Gatsl3	ENSMUSG00000020424.3	140.657	-1.33755	0.330794	-4.04546	5.22201e-05	0.000429402
289	Efemp1	ENSMUSG00000020467.15	276.311	-3.05809	0.713197	-4.36069	1.29651e-05	0.000129697
290	Xbp1	ENSMUSG00000020484.18	2873.92	-1.48907	0.338717	-4.39752	1.09496e-05	0.000112288
291	Supt4a	ENSMUSG00000020485.14	740.645	-1.1232	0.171057	-6.56607	5.16611e-11	2.07354e-09
292	Tom1l1	ENSMUSG00000020541.12	97.8208	-2.58049	0.63506	-4.08319	4.44213e-05	0.000372785
293	Apob	ENSMUSG00000020609.14	18.8264	-2.52827	0.893944	-3.36502	0.000765381	0.00412535
294	Abca8b	ENSMUSG00000020620.14	49.6015	-2.30416	0.643274	-3.59348	0.000326295	0.00201423
295	Klhl29	ENSMUSG00000020627.10	142.308	-3.34473	0.38858	-8.54825	1.2497e-17	1.55911e-15
296	Rsad2	ENSMUSG00000020641.15	202.997	-1.64968	0.576543	-2.87568	0.00403153	0.0161542
297	Ccl11	ENSMUSG00000020676.2	284.287	-5.08123	0.542025	-9.16962	4.74669e-20	8.37598e-18
298	Mmp28	ENSMUSG00000020682.17	121.023	-3.50287	0.457288	-7.58577	3.30513e-14	2.51897e-12
299	Itgb3	ENSMUSG00000020689.4	493.835	-2.42495	0.409289	-5.92815	3.06365e-09	8.20899e-08
300	Grin2c	ENSMUSG00000020734.13	25.6907	-2.87543	0.657018	-4.27827	1.88353e-05	0.000179265
301	Mif4gd	ENSMUSG00000020743.15	1326.9	-1.38981	0.247653	-5.61206	1.99934e-08	4.37066e-07
302	Trim47	ENSMUSG00000020773.11	217.584	-1.67991	0.380594	-4.41524	1.00898e-05	0.00010451
303	Aspa	ENSMUSG00000020774.9	54.2119	-2.4827	0.855174	-3.00418	0.00266301	0.0114928
304	Llgl2	ENSMUSG00000020782.18	469.928	-1.19847	0.35508	-3.37518	0.000737662	0.00400349
305	Camkk1	ENSMUSG00000020785.17	1011.74	-1.65398	0.325134	-5.08678	3.64203e-07	5.69079e-06
306	Atp2a3	ENSMUSG00000020788.15	8240.52	-1.0537	0.197082	-5.34662	8.96132e-08	1.66533e-06
307	Spns3	ENSMUSG00000020798.14	137.469	-2.66635	0.443011	-6.0065	1.89573e-09	5.35037e-08
308	Nos2	ENSMUSG00000020826.8	84.3471	-2.6709	0.569486	-4.68085	2.85682e-06	3.53038e-05
309	Vmo1	ENSMUSG00000020830.3	6.74093	-3.83761	0.847003	-4.37456	1.21676e-05	0.00012292
310	Slc6a4	ENSMUSG00000020838.12	50.1103	-4.17759	0.741854	-5.23542	1.64608e-07	2.83319e-06
311	Tmigd1	ENSMUSG00000020839.16	8.61332	-3.34573	0.768402	-3.79528	0.000147479	0.00103094
312	Doc2b	ENSMUSG00000020848.7	31.4799	-2.91913	0.71198	-4.02808	5.62351e-05	0.000457995
313	Cacnb1	ENSMUSG00000020882.17	274.076	-1.26708	0.304698	-4.15805	3.20981e-05	0.000282057
314	Nr1d1	ENSMUSG00000020889.11	386.984	-1.40927	0.437776	-3.22394	0.00126441	0.00623514
315	Gucy2e	ENSMUSG00000020890.11	28.9224	-3.93864	0.720187	-4.55785	5.16788e-06	5.91603e-05
316	Krt12	ENSMUSG00000020912.4	2.55317	-2.62905	0.894703	-2.66938	0.00759904	0.0269545
317	Krt24	ENSMUSG00000020913.3	2.04674	-2.4466	0.961352	-2.55395	0.0106509	0.0354141
318	Krt36	ENSMUSG00000020916.8	2.47361	-2.69613	0.906374	-3.01344	0.00258305	0.0112282
319	Stat5b	ENSMUSG00000020919.11	5258.4	-1.07002	0.257238	-4.15985	3.1845e-05	0.000280084
320	Adam11	ENSMUSG00000020926.16	265.042	-1.78012	0.704359	-2.55194	0.0107124	0.0355874
321	Foxg1	ENSMUSG00000020950.10	16.0843	-2.07481	0.753919	-2.75793	0.0058168	0.0218557
322	Ston2	ENSMUSG00000020961.14	122.276	-1.98005	0.526946	-3.76704	0.000165195	0.00113373
323	Tshr	ENSMUSG00000020963.14	27.4516	-2.73605	0.907052	-3.11873	0.00181631	0.00843235
324	Cdkl1	ENSMUSG00000020990.4	38.5652	-3.50943	0.522503	-6.40519	1.50179e-10	5.40727e-09
325	Nfkbia	ENSMUSG00000021025.8	3252.57	-2.01655	0.200351	-10.0653	7.8657e-24	2.08197e-21
326	Rab15	ENSMUSG00000021062.15	487.759	-1.76114	0.652283	-2.71059	0.00671639	0.0244297
327	Pygl	ENSMUSG00000021069.16	587.582	-1.70857	0.690029	-2.49774	0.0124986	0.0402384
328	Bdkrb2	ENSMUSG00000021070.5	11.4287	-3.08915	0.681718	-4.01263	6.0045e-05	0.000482206
329	Clmn	ENSMUSG00000021097.14	91.1563	-2.94351	0.580055	-5.06318	4.12329e-07	6.35928e-06
330	4930447C04Rik	ENSMUSG00000021098.14	13.2676	-1.90263	0.647544	-2.90269	0.00369967	0.0150625
331	Prkch	ENSMUSG00000021108.17	1424.51	-1.18132	0.225887	-5.23006	1.69459e-07	2.90139e-06
332	Rdh12	ENSMUSG00000021123.12	95.5621	-1.44907	0.345966	-4.18882	2.80408e-05	0.000251366
333	Arg2	ENSMUSG00000021125.6	42.2835	-2.93672	0.536946	-5.39307	6.92638e-08	1.33007e-06
334	Zfp36l1	ENSMUSG00000021127.7	2169.18	-1.01739	0.352382	-2.88797	0.00387739	0.01563
335	Smoc1	ENSMUSG00000021136.13	1304.09	-2.41006	0.458069	-5.26698	1.38685e-07	2.44502e-06
336	Esyt2	ENSMUSG00000021171.7	2860.85	-1.04732	0.227377	-4.60632	4.09866e-06	4.83035e-05
337	Tc2n	ENSMUSG00000021187.14	6.49448	-3.20062	0.828635	-3.92394	8.7112e-05	0.000659298
338	Chga	ENSMUSG00000021194.5	69.219	-4.03243	0.890889	-4.51984	6.18875e-06	6.88464e-05
339	Unc79	ENSMUSG00000021198.16	28.3908	-1.99424	0.587471	-3.38461	0.000712802	0.00389338
340	Akr1c12	ENSMUSG00000021211.3	11.4475	-2.26242	0.726594	-3.00968	0.00261519	0.0113302
341	Akr1c13	ENSMUSG00000021213.11	141.68	-3.3994	0.314566	-10.6959	1.06429e-26	3.79023e-24
342	Akr1c18	ENSMUSG00000021214.13	6.60133	-3.79191	0.826024	-4.41265	1.02113e-05	0.000105602
343	Entpd5	ENSMUSG00000021236.16	2224.6	-1.09107	0.230053	-4.7429	2.10679e-06	2.70595e-05
344	Vsx2	ENSMUSG00000021239.12	3.7758	-2.49071	0.905477	-2.64226	0.00823559	0.0287439
345	Degs2	ENSMUSG00000021263.10	71.2646	-4.92949	0.588554	-7.54866	4.39776e-14	3.21414e-12
346	Ppp1r13b	ENSMUSG00000021285.14	1014.94	-2.77837	0.232132	-11.9656	5.38322e-33	2.92892e-30
347	Gng4	ENSMUSG00000021303.13	8.80176	-2.76436	0.753239	-3.38406	0.00071422	0.00389747
348	Gli3	ENSMUSG00000021318.15	95.4225	-2.40573	0.462027	-5.19994	1.9935e-07	3.35453e-06
349	Gpld1	ENSMUSG00000021340.12	52.2395	-2.25391	0.370047	-6.05221	1.42868e-09	4.13348e-08
350	Irf4	ENSMUSG00000021356.9	489.597	-1.81185	0.593415	-3.07749	0.00208753	0.00943215
351	Serpinb9b	ENSMUSG00000021403.2	6.21361	-1.98255	0.735577	-2.56297	0.0103782	0.0346891
352	Shc3	ENSMUSG00000021448.6	4.97231	-2.66152	0.814747	-3.03803	0.00238126	0.010494
353	Sema4d	ENSMUSG00000021451.15	5123.73	-1.34025	0.171618	-7.8097	5.73231e-15	4.96808e-13
354	Syk	ENSMUSG00000021457.14	1966.66	-1.52079	0.519841	-2.93542	0.00333094	0.0138218
355	Ctsl	ENSMUSG00000021477.8	17383.6	-2.35504	0.586457	-4.02673	5.65586e-05	0.000460056
356	Cdk20	ENSMUSG00000021483.7	675.361	-1.4256	0.366683	-3.88828	0.000100958	0.000746496
357	Slc25a48	ENSMUSG00000021509.5	16.9927	-2.80936	0.908147	-3.1019	0.00192285	0.00883069
358	Dapk1	ENSMUSG00000021559.13	1178.61	-1.2529	0.394962	-3.17388	0.00150413	0.00721738
359	Slc6a19	ENSMUSG00000021565.16	528.719	-4.92069	0.487714	-10.0216	1.22476e-23	3.15649e-21
360	NA	ENSMUSG00000021566.6	16.4429	-3.51053	0.851969	-4.27092	1.94664e-05	0.000184108
361	Tppp	ENSMUSG00000021573.14	379.94	-2.88955	0.544697	-5.32535	1.0076e-07	1.83931e-06
362	Pcsk1	ENSMUSG00000021587.4	47.1911	-3.67893	0.808275	-4.68376	2.81654e-06	3.485e-05
363	Mctp1	ENSMUSG00000021596.16	69.5865	-1.78881	0.464172	-3.85465	0.000115896	0.000838895
364	F2rl1	ENSMUSG00000021678.8	224.395	-1.94783	0.73329	-2.67384	0.00749883	0.0267005
365	Crhbp	ENSMUSG00000021680.7	27.2893	-4.2967	0.763808	-4.75	2.03421e-06	2.62478e-05
366	Elovl7	ENSMUSG00000021696.8	89.2314	-2.1879	0.592041	-3.70974	0.000207473	0.00137942
367	Rasgrf2	ENSMUSG00000021708.17	130.514	-3.5787	0.459591	-7.6833	1.55043e-14	1.22948e-12
368	Rgs7bp	ENSMUSG00000021719.8	10.8452	-2.52403	0.697422	-3.16344	0.00155919	0.00741078
369	Hcn1	ENSMUSG00000021730.8	11.799	-3.3717	0.780076	-3.82981	0.000128242	0.000913075
370	Fgf10	ENSMUSG00000021732.14	40.4288	-3.12633	0.748069	-4.14163	3.44843e-05	0.000299001
371	Fezf2	ENSMUSG00000021743.5	85.019	-5.67153	0.686964	-6.39521	1.60328e-10	5.73057e-09
372	Oit1	ENSMUSG00000021749.5	23.2741	-4.69251	0.692733	-5.24999	1.5211e-07	2.6507e-06
373	Fam107a	ENSMUSG00000021750.15	223.051	-3.14457	0.681046	-4.68418	2.81087e-06	3.48018e-05
374	BC067074	ENSMUSG00000021763.16	51.906	-1.60289	0.539477	-2.98096	0.00287346	0.0122513
375	Thrb	ENSMUSG00000021779.16	98.4312	-1.92178	0.670233	-2.90337	0.0036917	0.0150363
376	Sftpa1	ENSMUSG00000021789.14	2.53608	-2.43877	0.934431	-2.7253	0.00642439	0.0236043
377	Sftpd	ENSMUSG00000021795.9	9.03528	-2.76857	0.7716	-3.38743	0.00070551	0.00386001
378	Cdhr1	ENSMUSG00000021803.9	75.9196	-4.91939	0.602371	-7.25213	4.10263e-13	2.51907e-11
379	Plau	ENSMUSG00000021822.2	243.272	-1.30718	0.415688	-3.14624	0.00165383	0.00778505
380	Galnt15	ENSMUSG00000021903.11	191.754	-1.23156	0.428397	-2.88244	0.00394603	0.0158611
381	Chat	ENSMUSG00000021919.7	2.48596	-2.53534	0.952956	-2.71882	0.00655146	0.0239812
382	Spryd7	ENSMUSG00000021930.14	238.965	-1.08657	0.352335	-3.08406	0.00204197	0.00924979
383	Tdh	ENSMUSG00000021953.14	7.8197	-2.66749	0.71343	-3.39424	0.000688201	0.00378115
384	Fgf9	ENSMUSG00000021974.14	15.8945	-2.23896	0.604618	-3.59603	0.000323111	0.00199961
385	Tsc22d1	ENSMUSG00000022010.19	2134.1	-1.76291	0.400075	-4.40882	1.03935e-05	0.000107316
386	Dnajc15	ENSMUSG00000022013.3	693.43	-1.22247	0.221531	-5.51877	3.41383e-08	7.08334e-07
387	Epsti1	ENSMUSG00000022014.14	1199.37	-2.08257	0.500281	-4.17412	2.99136e-05	0.000265121
388	Cnmd	ENSMUSG00000022025.13	10.404	-2.83864	0.752575	-3.3244	0.000886081	0.0046505
389	Olfm4	ENSMUSG00000022026.6	19.8528	-2.55725	0.748912	-3.39502	0.000686225	0.00377241
390	Scara5	ENSMUSG00000022032.14	123.427	-2.28229	0.800958	-2.95899	0.00308647	0.0129954
391	Chrna2	ENSMUSG00000022041.10	3.27847	-2.48132	0.953695	-2.75485	0.00587193	0.022029
392	Nefm	ENSMUSG00000022054.11	126.846	-5.44502	0.72406	-6.59522	4.24637e-11	1.75103e-09
393	Nefl	ENSMUSG00000022055.7	7.51394	-2.61082	0.897848	-3.23548	0.00121438	0.00603861
394	Dmtn	ENSMUSG00000022099.16	135.691	-1.95415	0.366053	-5.33627	9.48773e-08	1.74822e-06
395	Gfra2	ENSMUSG00000022103.9	134.584	-3.29307	0.628397	-5.24065	1.60013e-07	2.76383e-06
396	Rcbtb2	ENSMUSG00000022106.14	4125.83	-1.15611	0.464551	-2.49051	0.0127559	0.0409138
397	4930449E01Rik	ENSMUSG00000022116.7	3.92996	-2.1226	0.87887	-2.42066	0.0154922	0.0478729
398	Acod1	ENSMUSG00000022126.6	7.41597	-2.0351	0.90395	-2.42088	0.0154828	0.0478558
399	Gdnf	ENSMUSG00000022144.3	5.24002	-2.55131	0.831121	-2.92196	0.00347837	0.0143162
400	Osmr	ENSMUSG00000022146.12	502.585	-2.36568	0.314549	-7.52028	5.46606e-14	3.87912e-12
401	Pdzd2	ENSMUSG00000022197.15	305.547	-2.15599	0.428945	-5.03261	4.83845e-07	7.29006e-06
402	Efs	ENSMUSG00000022203.6	216.763	-3.12057	0.366685	-8.4846	2.16469e-17	2.61727e-15
403	Npr3	ENSMUSG00000022206.6	171.957	-2.88032	0.878715	-3.45374	0.000552863	0.00315252
404	Carmil3	ENSMUSG00000022211.8	156.536	-2.99333	0.553437	-5.40729	6.39866e-08	1.2409e-06
405	Cma1	ENSMUSG00000022225.6	21.0813	-2.99202	0.809541	-3.55129	0.000383353	0.00231362
406	Cmbl	ENSMUSG00000022235.14	54.1268	-2.07265	0.641837	-3.23775	0.00120476	0.00600145
407	Ankrd33b	ENSMUSG00000022237.16	156.683	-4.67076	0.376843	-11.7253	9.45691e-32	4.74955e-29
408	Retreg1	ENSMUSG00000022270.15	600.28	-3.12826	0.287164	-10.8815	1.4121e-27	5.64466e-25
409	Dcstamp	ENSMUSG00000022303.8	1.75187	-2.40247	0.945013	-2.55178	0.0107176	0.0355926
410	Angpt1	ENSMUSG00000022309.8	252.653	-2.01078	0.652197	-3.10386	0.00191014	0.00878672
411	Osr2	ENSMUSG00000022330.4	14.4141	-2.33058	0.69207	-3.30949	0.000934657	0.00485342
412	Has2	ENSMUSG00000022367.7	22.0996	-1.6716	0.650064	-2.57615	0.00999086	0.0336644
413	Sla	ENSMUSG00000022372.14	7915.27	-2.01067	0.578472	-3.48626	0.000489819	0.00283933
414	Ppara	ENSMUSG00000022383.13	98.1654	-2.23176	0.918599	-2.78504	0.00535209	0.0204549
415	Fam83f	ENSMUSG00000022408.6	69.5325	-2.88999	0.392802	-7.26392	3.76024e-13	2.3234e-11
416	Deptor	ENSMUSG00000022419.15	486.202	-1.46315	0.608159	-2.41619	0.015684	0.0483023
417	Enpp2	ENSMUSG00000022425.15	704.458	-4.01344	0.601312	-6.73451	1.64485e-11	7.4578e-10
418	Csnk1e	ENSMUSG00000022433.18	2177.23	-1.00996	0.387526	-2.60628	0.00915322	0.0313968
419	Nell2	ENSMUSG00000022454.16	40.077	-3.59419	0.706067	-4.966	6.83485e-07	9.85094e-06
420	Hdac7	ENSMUSG00000022475.18	10967.6	-1.01879	0.383589	-2.65606	0.00790597	0.0278916
421	Ppp1r1a	ENSMUSG00000022490.6	44.2195	-2.77969	0.894948	-3.36627	0.000761909	0.00411343
422	Tnfrsf17	ENSMUSG00000022496.5	16.1147	-2.05362	0.902711	-2.55394	0.0106512	0.0354141
423	Ciita	ENSMUSG00000022504.9	898.253	-2.6984	0.611494	-4.46469	8.01854e-06	8.53582e-05
424	Emp2	ENSMUSG00000022505.8	211.562	-1.23147	0.314365	-3.91909	8.88851e-05	0.00066987
425	Bcl6	ENSMUSG00000022508.5	2536.78	-3.12916	0.340352	-9.19628	3.70539e-20	6.72014e-18
426	Trp63	ENSMUSG00000022510.14	804.025	-2.68541	0.799089	-3.48125	0.000499086	0.00288536
427	Cldn1	ENSMUSG00000022512.2	246.775	-2.10639	0.768766	-2.80899	0.00496971	0.0192261
428	Oplah	ENSMUSG00000022562.14	516.034	-2.35567	0.344418	-6.84009	7.91442e-12	3.82765e-10
429	Ly6h	ENSMUSG00000022577.16	9.25984	-3.29019	0.755232	-3.70206	0.000213853	0.00141225
430	Ly6c2	ENSMUSG00000022584.14	378.799	-3.07712	0.756899	-4.24843	2.15274e-05	0.000200503
431	Lypd2	ENSMUSG00000022595.7	8.09071	-4.00177	0.849899	-4.52655	5.99556e-06	6.71825e-05
432	Psca	ENSMUSG00000022598.6	86.9449	-2.0211	0.916022	-2.47064	0.0134871	0.0428365
433	Arc	ENSMUSG00000022602.14	297.707	-1.55614	0.239667	-6.49144	8.50213e-11	3.25256e-09
434	Mapk12	ENSMUSG00000022610.9	74.9478	-1.16144	0.433556	-2.68282	0.00730041	0.0261414
435	Kif21a	ENSMUSG00000022629.16	197.077	-3.6632	0.562472	-6.50333	7.85589e-11	3.03498e-09
436	NA	ENSMUSG00000022639.14	198.977	-1.56775	0.409397	-3.83097	0.000127639	0.000909446
437	Morc1	ENSMUSG00000022652.6	97.0052	-3.71967	0.554278	-6.62045	3.58108e-11	1.49558e-09
438	Nectin3	ENSMUSG00000022656.15	102.902	-1.387	0.262059	-5.29112	1.21569e-07	2.17857e-06
439	Cd96	ENSMUSG00000022657.9	398.657	-2.03374	0.806299	-2.60228	0.00926057	0.0316391
440	Gcsam	ENSMUSG00000022659.13	82.7975	-2.53184	0.655329	-3.89901	9.65868e-05	0.000718786
441	Ccdc80	ENSMUSG00000022665.14	632.165	-1.46086	0.584326	-2.50162	0.0123627	0.0398925
442	Boc	ENSMUSG00000022687.12	326.641	-2.12522	0.665651	-3.21761	0.00129263	0.00635513
443	St3gal6	ENSMUSG00000022747.16	419.404	-4.70004	0.262109	-17.6373	1.2741e-69	3.56511e-66
444	Adgrg7	ENSMUSG00000022755.4	10.0588	-3.28331	0.845164	-3.62573	0.000288145	0.00181387
445	P2rx6	ENSMUSG00000022758.12	38.1983	-3.17556	0.508007	-5.98683	2.13972e-09	5.95322e-08
446	Abcc5	ENSMUSG00000022822.15	3443.84	-1.02166	0.4091	-2.49881	0.012461	0.0401633
447	Muc13	ENSMUSG00000022824.12	29.1311	-2.1919	0.69951	-3.13128	0.00174045	0.00813413
448	Dirc2	ENSMUSG00000022848.8	981.105	-2.29552	0.380985	-6.02716	1.66864e-09	4.77134e-08
449	Hspbap1	ENSMUSG00000022849.4	415.93	-1.7298	0.250762	-6.8974	5.29637e-12	2.66828e-10
450	Ehhadh	ENSMUSG00000022853.6	472.945	-1.04984	0.37686	-2.78725	0.0053157	0.0203277
451	Adipoq	ENSMUSG00000022878.5	1375.82	-2.26251	0.969621	-3.07405	0.00211174	0.00952837
452	Robo1	ENSMUSG00000022883.10	130.433	-1.85609	0.410267	-4.5269	5.98547e-06	6.71672e-05
453	St6gal1	ENSMUSG00000022885.15	1455.98	-3.5322	0.42284	-8.363	6.11428e-17	6.96281e-15
454	Ets2	ENSMUSG00000022895.14	6439.5	-2.18655	0.477077	-4.58733	4.4895e-06	5.22806e-05
455	Ildr1	ENSMUSG00000022900.14	85.1238	-2.17467	0.704842	-3.12219	0.00179513	0.00835779
456	Cd86	ENSMUSG00000022901.13	418.244	-2.04587	0.575697	-3.57376	0.000351886	0.00215657
457	Ripply3	ENSMUSG00000022941.8	25.0355	-1.9141	0.556345	-3.42125	0.000623336	0.00348538
458	Cbr3	ENSMUSG00000022947.7	238.361	-4.08335	0.461419	-8.79331	1.45213e-18	2.10687e-16
459	Ifngr2	ENSMUSG00000022965.7	969.092	-1.00794	0.350247	-2.87854	0.00399521	0.0160422
460	Il10rb	ENSMUSG00000022969.13	506.466	-1.18243	0.417509	-2.83475	0.00458618	0.0179458
461	Enah	ENSMUSG00000022995.16	448.273	-1.41474	0.516941	-2.74108	0.00612382	0.0227474
462	Dhh	ENSMUSG00000023000.4	9.89999	-2.68831	0.651371	-3.79302	0.000148825	0.00103738
463	Gpd1	ENSMUSG00000023019.12	4172.51	-3.0821	0.895147	-3.98778	6.66931e-05	0.000526741
464	Lima1	ENSMUSG00000023022.13	1095.59	-1.02795	0.383718	-2.6796	0.00737099	0.0263459
465	Slc4a8	ENSMUSG00000023032.12	153.874	-1.77596	0.662211	-2.7028	0.00687582	0.0248802
466	Nr4a1	ENSMUSG00000023034.6	1125.12	-5.09845	0.376387	-13.4983	1.59964e-41	1.64906e-38
467	Krt18	ENSMUSG00000023043.6	4161.93	-3.63419	0.676552	-5.42649	5.74723e-08	1.1291e-06
468	Igfbp6	ENSMUSG00000023046.6	233.659	-2.02452	0.829543	-2.52236	0.011657	0.0381116
469	Sncg	ENSMUSG00000023064.4	80.2616	-2.89219	0.640342	-4.49778	6.86656e-06	7.52632e-05
470	Cdkn1a	ENSMUSG00000023067.13	477.648	-1.34146	0.460166	-2.9171	0.00353307	0.0145108
471	Sult1c2	ENSMUSG00000023122.6	3.41534	-3.08846	0.860193	-3.58869	0.000332343	0.00204833
472	Epb42	ENSMUSG00000023216.13	5.37497	-2.93688	0.924421	-3.34943	0.000809789	0.00431601
473	Ccl25	ENSMUSG00000023235.14	4447.01	-3.52394	0.525656	-6.72331	1.77643e-11	7.96223e-10
474	Parp3	ENSMUSG00000023249.15	783.613	-1.364	0.471651	-2.89465	0.00379579	0.0153612
475	Cd4	ENSMUSG00000023274.14	14188	-4.25121	0.475176	-8.97205	2.91048e-19	4.67275e-17
476	Ache	ENSMUSG00000023328.14	722.086	-7.01639	0.590948	-11.3012	1.295e-29	6.0393e-27
477	Gcm1	ENSMUSG00000023333.8	2.24798	-2.29315	0.931136	-2.57233	0.0101016	0.0339498
478	Mx2	ENSMUSG00000023341.14	130.611	-2.28796	0.668233	-3.45721	0.000545805	0.00311863
479	Gnb3	ENSMUSG00000023439.11	9.57304	-2.85167	0.750336	-3.54942	0.000386076	0.00232608
480	Tulp2	ENSMUSG00000023467.18	18.2783	-2.62275	0.500757	-5.05794	4.23803e-07	6.51062e-06
481	Prph	ENSMUSG00000023484.13	18.6629	-3.67063	0.761421	-4.19252	2.75876e-05	0.000247643
482	Mmp25	ENSMUSG00000023903.7	112.539	-3.65534	0.567763	-6.30901	2.80822e-10	9.56601e-09
483	Mep1a	ENSMUSG00000023914.16	12.2311	-4.08615	0.843727	-4.70222	2.57346e-06	3.20651e-05
484	Satb1	ENSMUSG00000023927.15	28862.7	-2.31439	0.335813	-6.89358	5.44072e-12	2.7325e-10
485	Clic5	ENSMUSG00000023959.8	1211.7	-4.76814	0.505898	-9.43444	3.93073e-21	8.19056e-19
486	Enpp5	ENSMUSG00000023960.13	501.391	-1.48772	0.334452	-4.44923	8.61787e-06	9.09473e-05
487	Crip3	ENSMUSG00000023968.15	1046.76	-7.34101	0.663127	-10.6227	2.33656e-26	8.17255e-24
488	Pgc	ENSMUSG00000023987.14	8.31121	-3.2446	0.772856	-3.70587	0.00021067	0.00139689
489	Pi16	ENSMUSG00000024011.16	229.017	-1.9681	0.650028	-3.05373	0.00226016	0.0100548
490	Pim1	ENSMUSG00000024014.7	1249.33	-1.42938	0.222792	-6.4165	1.39439e-10	5.05776e-09
491	Tff3	ENSMUSG00000024029.4	17.9739	-2.34612	0.719877	-3.22108	0.0012771	0.00628979
492	Abcg1	ENSMUSG00000024030.6	2163.46	-1.79905	0.302239	-5.95339	2.62637e-09	7.15475e-08
493	Tff1	ENSMUSG00000024032.6	1.81176	-2.64436	0.943811	-2.7458	0.00603627	0.0225076
494	Xdh	ENSMUSG00000024066.8	756.678	-1.29106	0.379947	-3.40025	0.000673238	0.00371429
495	Cyp1b1	ENSMUSG00000024087.3	401.232	-1.35246	0.431461	-3.13973	0.00169105	0.00794497
496	Eci1	ENSMUSG00000024132.5	382.512	-3.09065	0.704842	-4.47168	7.7606e-06	8.31093e-05
497	Six2	ENSMUSG00000024134.11	140.413	-3.13809	0.729497	-4.36693	1.26005e-05	0.000126758
498	Spsb3	ENSMUSG00000024160.16	778.076	-1.2209	0.164663	-7.41427	1.22298e-13	8.28877e-12
499	C3	ENSMUSG00000024164.15	7561.58	-1.46627	0.598734	-2.46839	0.0135723	0.043058
500	St6gal2	ENSMUSG00000024172.10	4.13583	-3.30059	0.894536	-3.66473	0.000247599	0.00159426
501	Phf1	ENSMUSG00000024193.7	1179.07	-1.37012	0.313686	-4.36816	1.25296e-05	0.000126113
502	Nudt12	ENSMUSG00000024228.12	94.7916	-2.15517	0.593844	-3.64468	0.000267726	0.00170424
503	Cdh2	ENSMUSG00000024304.14	65.0518	-1.90243	0.478517	-3.9779	6.95264e-05	0.000543856
504	Tapbp	ENSMUSG00000024308.14	3570.83	-1.1166	0.306379	-3.64519	0.000267194	0.00170141
505	Mep1b	ENSMUSG00000024313.7	2.81512	-2.52464	0.920279	-2.87438	0.00404827	0.0162022
506	Dsc2	ENSMUSG00000024331.11	404.419	-3.00279	0.699646	-4.36459	1.27361e-05	0.000127603
507	Gfra3	ENSMUSG00000024366.7	7.52837	-2.81481	0.898316	-3.40724	0.000656223	0.00364017
508	Bin1	ENSMUSG00000024381.15	864.596	-2.74746	0.478115	-5.7567	8.57765e-09	2.05392e-07
509	Ltb	ENSMUSG00000024399.5	1730.25	-4.81427	0.512332	-9.42265	4.39859e-21	9.06897e-19
510	Lta	ENSMUSG00000024402.5	86.3412	-2.0211	0.668866	-3.04638	0.00231615	0.0102569
511	Aqp4	ENSMUSG00000024411.9	66.4021	-3.71834	0.693202	-5.24808	1.53695e-07	2.67119e-06
512	Lama3	ENSMUSG00000024421.16	773.605	-2.17685	0.704133	-3.12326	0.0017886	0.00833134
513	Ttc39c	ENSMUSG00000024424.14	66.6936	-1.89468	0.281966	-6.69549	2.14955e-11	9.50412e-10
514	Nr3c1	ENSMUSG00000024431.14	4513.67	-1.14253	0.184117	-6.20554	5.45098e-10	1.73607e-08
515	Diaph1	ENSMUSG00000024456.16	4171.32	-1.03896	0.152604	-6.80824	9.87977e-12	4.69697e-10
516	Spink1	ENSMUSG00000024503.2	7.42005	-3.24959	0.814687	-3.59574	0.000323475	0.00200104
517	Grp	ENSMUSG00000024517.16	78.611	-4.80044	0.76729	-5.71058	1.12595e-08	2.63487e-07
518	Pmaip1	ENSMUSG00000024521.7	168.663	-2.32871	0.537082	-4.35022	1.36001e-05	0.000135153
519	Cidea	ENSMUSG00000024526.8	858.27	-2.18458	0.968298	-3.26543	0.00109297	0.00551754
520	Sncaip	ENSMUSG00000024534.15	57.5357	-1.1681	0.347581	-3.36603	0.000762584	0.00411553
521	Setbp1	ENSMUSG00000024548.11	99.2388	-1.50937	0.548491	-2.77425	0.00553284	0.0210122
522	Pde6a	ENSMUSG00000024575.15	25.2653	-2.65683	0.696722	-3.76153	0.00016888	0.00115643
523	Il17b	ENSMUSG00000024578.2	2.82008	-2.2034	0.958311	-2.48421	0.0129838	0.0414798
524	Cd74	ENSMUSG00000024610.14	25093	-3.44238	0.502059	-6.88386	5.8251e-12	2.91062e-10
525	Cdx1	ENSMUSG00000024619.8	32.7115	-4.62999	0.769983	-5.05022	4.41304e-07	6.75827e-06
526	Tle4	ENSMUSG00000024642.16	555.822	-2.11309	0.547913	-3.86911	0.000109233	0.000798425
527	Scgb1a1	ENSMUSG00000024653.2	3.25835	-3.20055	0.883434	-3.57065	0.000356094	0.00217759
528	Cd5	ENSMUSG00000024669.7	2656.58	-6.94166	0.334104	-20.5173	1.51017e-93	9.85988e-90
529	Cd6	ENSMUSG00000024670.16	3144.33	-5.57401	0.541202	-10.3532	4.04587e-25	1.23823e-22
530	Gif	ENSMUSG00000024682.3	2.16917	-2.24862	0.917927	-2.58565	0.00971952	0.0329485
531	Gna14	ENSMUSG00000024697.3	45.8874	-3.32886	0.675437	-4.84637	1.2574e-06	1.71559e-05
532	Ankrd22	ENSMUSG00000024774.15	10.5138	-1.71721	0.638315	-2.65827	0.0078543	0.0277343
533	Fas	ENSMUSG00000024778.12	1116.3	-1.87628	0.490146	-3.83384	0.000126158	0.00089955
534	Tnfrsf25	ENSMUSG00000024793.14	76.1128	-1.9815	0.555784	-3.56723	0.00036078	0.00220281
535	Htr7	ENSMUSG00000024798.15	49.6225	-3.5344	0.529748	-6.41827	1.37829e-10	5.00865e-09
536	Cst6	ENSMUSG00000024846.5	35.3318	-3.10316	0.648255	-4.71211	2.4516e-06	3.07424e-05
537	Mbl2	ENSMUSG00000024863.5	3.10075	-2.0436	0.944903	-2.41062	0.0159252	0.0488914
538	Apba1	ENSMUSG00000024897.8	138.557	-2.18935	0.280197	-7.79996	6.19266e-15	5.34342e-13
539	Ovol1	ENSMUSG00000024922.1	11.2437	-2.32208	0.795366	-2.85627	0.00428651	0.0169555
540	Vldlr	ENSMUSG00000024924.14	260.439	-2.67813	0.593507	-4.53601	5.73281e-06	6.47196e-05
541	Slc1a1	ENSMUSG00000024935.10	20.9505	-2.00944	0.629185	-3.17382	0.0015045	0.00721738
542	Ltbp3	ENSMUSG00000024940.10	517.372	-1.213	0.407305	-2.9793	0.00288905	0.0123071
543	Map4k2	ENSMUSG00000024948.14	5091.69	-1.74036	0.432962	-4.02173	5.77725e-05	0.00046818
544	Kcnk4	ENSMUSG00000024957.8	6.39213	-3.55389	0.827161	-4.21821	2.46255e-05	0.000224657
545	Lgals12	ENSMUSG00000024972.16	176.761	-3.36389	0.845795	-4.23652	2.27009e-05	0.000209638
546	Pdcd4	ENSMUSG00000024975.12	3440.07	-1.31304	0.170629	-7.69531	1.41149e-14	1.14243e-12
547	Rbp4	ENSMUSG00000024990.12	119.6	-4.12916	0.839563	-5.09089	3.56386e-07	5.60686e-06
548	Plce1	ENSMUSG00000024998.17	163.593	-1.44213	0.456617	-3.16411	0.00155557	0.00739842
549	Tdrd1	ENSMUSG00000025081.13	3.60524	-2.53086	0.949235	-2.82687	0.00470058	0.0183334
550	Afap1l2	ENSMUSG00000025083.17	205.607	-2.49881	0.425236	-5.8757	4.21063e-09	1.09818e-07
551	Bnc1	ENSMUSG00000025105.9	69.0038	-1.64927	0.652758	-2.53998	0.0110859	0.036574
552	Ppp1r27	ENSMUSG00000025129.2	14.3984	-4.23173	0.871824	-4.75141	2.02004e-06	2.6082e-05
553	Cbr2	ENSMUSG00000025150.10	1741.66	-5.22184	0.572043	-9.17509	4.5121e-20	8.03441e-18
554	Cd7	ENSMUSG00000025163.6	256.519	-3.95973	0.589036	-6.72277	1.78307e-11	7.97374e-10
555	Sectm1a	ENSMUSG00000025165.12	73.2135	-3.29368	0.592844	-5.00282	5.64988e-07	8.35201e-06
556	Ubtd1	ENSMUSG00000025171.1	304.595	-1.0067	0.223829	-4.49789	6.86299e-06	7.52632e-05
557	Fn3k	ENSMUSG00000025175.12	177.908	-1.95311	0.558659	-3.50074	0.000463963	0.00271049
558	Kazald1	ENSMUSG00000025213.11	52.1149	-1.46416	0.40944	-3.57429	0.000351182	0.00215293
559	Dnase1l3	ENSMUSG00000025279.7	779.126	-4.84469	0.597926	-8.13673	4.0611e-16	4.10024e-14
560	Atp10a	ENSMUSG00000025324.8	2157	-1.80219	0.407328	-4.42652	9.57658e-06	9.95629e-05
561	Cdh9	ENSMUSG00000025370.6	7.09343	-3.60829	0.760621	-3.99106	6.57787e-05	0.000520569
562	Tac2	ENSMUSG00000025400.11	2.41561	-2.37474	0.956147	-2.58253	0.00980798	0.0331622
563	Myo1a	ENSMUSG00000025401.9	37.9156	-1.31624	0.458257	-2.8661	0.00415565	0.0165373
564	Nab2	ENSMUSG00000025402.12	890.896	-2.90771	0.319604	-9.09589	9.38133e-20	1.58407e-17
565	Avil	ENSMUSG00000025432.11	40.356	-3.32172	0.576782	-5.64176	1.68321e-08	3.75501e-07
566	Cd163l1	ENSMUSG00000025461.11	333.9	-4.2508	0.691893	-6.21699	5.06777e-10	1.63261e-08
567	Prap1	ENSMUSG00000025467.8	3.94551	-2.61568	0.925167	-2.72808	0.0063704	0.0234518
568	Msx3	ENSMUSG00000025469.10	5.97415	-3.57211	0.845218	-4.14401	3.41278e-05	0.0002965
569	Cyp2e1	ENSMUSG00000025479.9	1185.43	-4.20888	0.84723	-5.66415	1.47756e-08	3.36522e-07
570	Urah	ENSMUSG00000025481.12	28.0509	-1.71153	0.712363	-2.41126	0.0158975	0.0488294
571	Bet1l	ENSMUSG00000025484.9	21.4219	-1.26919	0.525835	-2.4065	0.0161062	0.0493003
572	Cox8b	ENSMUSG00000025488.9	302.435	-2.54311	0.924619	-3.22559	0.00125713	0.00620546
573	Ifitm3	ENSMUSG00000025492.6	1139.47	-1.8017	0.413952	-4.35591	1.32516e-05	0.000132092
574	Cdhr5	ENSMUSG00000025497.15	12.5776	-3.64802	0.76959	-4.09952	4.14005e-05	0.000350134
575	Irf7	ENSMUSG00000025498.15	1243.44	-2.80632	0.632735	-4.48938	7.14303e-06	7.75128e-05
576	Eps8l2	ENSMUSG00000025504.13	178.544	-2.58599	0.630379	-4.1238	3.72677e-05	0.000319878
577	Pnpla2	ENSMUSG00000025509.15	3104.69	-1.71049	0.632625	-2.71853	0.00655725	0.0239934
578	Phkg1	ENSMUSG00000025537.12	24.9923	-2.09544	0.904668	-2.50825	0.0121331	0.0392875
579	Fgf14	ENSMUSG00000025551.13	229.374	-5.79293	0.696815	-7.73569	1.02843e-14	8.64542e-13
580	Cpeb1	ENSMUSG00000025586.17	305.175	-1.51466	0.447916	-3.38401	0.000714348	0.00389747
581	Klhl4	ENSMUSG00000025597.13	65.3995	-2.12275	0.502358	-4.22074	2.43503e-05	0.00022277
582	Map3k7cl	ENSMUSG00000025610.7	36.5617	-2.2084	0.627273	-3.51691	0.000436598	0.00257968
583	Shisa5	ENSMUSG00000025647.16	4995.58	-1.94437	0.485676	-4.01332	5.98696e-05	0.000481192
584	Alox5	ENSMUSG00000025701.12	39.1335	-2.88655	0.618276	-4.61532	3.92494e-06	4.64518e-05
585	March8	ENSMUSG00000025702.15	522.541	-1.60084	0.212459	-7.53495	4.88507e-14	3.51779e-12
586	Gng13	ENSMUSG00000025739.13	6.20502	-3.56793	0.881944	-4.01499	5.9448e-05	0.000478392
587	Hspa4l	ENSMUSG00000025757.12	1504.38	-1.99019	0.242431	-8.20921	2.2264e-16	2.30733e-14
588	Itih5	ENSMUSG00000025780.7	439.878	-2.20634	0.485597	-4.55056	5.35041e-06	6.09647e-05
589	Clec3b	ENSMUSG00000025784.5	174.808	-3.30397	0.785908	-4.37717	1.20228e-05	0.000121826
590	Fam20c	ENSMUSG00000025854.15	80.7868	-1.98411	0.499848	-3.96265	7.41213e-05	0.000575431
591	Prkar1b	ENSMUSG00000025855.13	198.273	-1.50928	0.310049	-4.86826	1.12584e-06	1.55513e-05
592	Unc5a	ENSMUSG00000025876.15	95.1735	-1.81452	0.441341	-4.11421	3.88507e-05	0.000330856
593	Casp12	ENSMUSG00000025887.10	114.67	-1.84414	0.316447	-5.82496	5.71279e-09	1.44196e-07
594	Casp1	ENSMUSG00000025888.5	196.855	-2.36224	0.559021	-4.24557	2.1804e-05	0.000202789
595	Sgk3	ENSMUSG00000025915.14	622.49	-3.40788	0.279873	-12.1611	5.00543e-34	2.88357e-31
596	Tfap2b	ENSMUSG00000025927.13	13.5747	-3.88738	0.8517	-4.54294	5.54763e-06	6.28828e-05
597	Msc	ENSMUSG00000025930.6	102.073	-3.11744	0.342424	-9.00395	2.1773e-19	3.55389e-17
598	Gsta3	ENSMUSG00000025934.15	82.1931	-2.35943	0.747584	-3.20132	0.00136798	0.00667032
599	Slco5a1	ENSMUSG00000025938.16	125.554	-4.66715	0.469105	-9.22461	2.84583e-20	5.20946e-18
600	Klf7	ENSMUSG00000025959.13	1242.02	-1.41733	0.41288	-3.43479	0.000593023	0.00334453
601	Adam23	ENSMUSG00000025964.15	199.14	-2.2508	0.513291	-4.39595	1.10287e-05	0.000112922
602	Cps1	ENSMUSG00000025991.8	13.5942	-2.65888	0.881782	-3.4123	0.000644164	0.0035875
603	Icos	ENSMUSG00000026009.14	316.263	-3.54162	0.554313	-6.39531	1.60223e-10	5.73057e-09
604	Cd28	ENSMUSG00000026012.2	4802.37	-1.59278	0.555001	-2.87515	0.00403841	0.0161726
605	Slc9a2	ENSMUSG00000026062.12	234.079	-4.68139	0.686996	-6.79709	1.06757e-11	5.01449e-10
606	Il1rl1	ENSMUSG00000026069.15	19.051	-2.94916	0.804916	-3.51766	0.000435363	0.00257394
607	Il18r1	ENSMUSG00000026070.15	251.037	-2.66746	0.59493	-4.50856	6.52682e-06	7.1942e-05
608	Il1r1	ENSMUSG00000026072.12	278.55	-1.13949	0.268949	-4.23972	2.23799e-05	0.000207162
609	Il1r2	ENSMUSG00000026073.13	44.6323	-3.0867	0.4201	-7.11365	1.13017e-12	6.46802e-11
610	Npas2	ENSMUSG00000026077.15	99.64	-3.34711	0.448331	-7.39468	1.41749e-13	9.47587e-12
611	Chst10	ENSMUSG00000026080.13	789.389	-1.03092	0.198056	-5.20511	1.9388e-07	3.27091e-06
612	2010300C02Rik	ENSMUSG00000026090.16	245.637	-3.27635	0.566777	-5.79087	7.00243e-09	1.72524e-07
613	Stk17b	ENSMUSG00000026094.14	3112.99	-1.74619	0.340946	-5.12325	3.00319e-07	4.85342e-06
614	Mstn	ENSMUSG00000026100.6	2.89428	-2.43947	0.924742	-2.78874	0.00529128	0.0202462
615	Inpp1	ENSMUSG00000026102.9	803.4	-1.06518	0.164433	-6.47819	9.28265e-11	3.51003e-09
616	Nabp1	ENSMUSG00000026107.11	3433.66	-1.22328	0.32104	-3.81085	0.000138488	0.000976793
617	Inpp4a	ENSMUSG00000026113.17	514.488	-1.70072	0.278097	-6.1161	9.58907e-10	2.88069e-08
618	Col19a1	ENSMUSG00000026141.13	5.83472	-3.15917	0.850638	-3.79359	0.000148483	0.0010361
619	Col9a1	ENSMUSG00000026147.16	5.98828	-2.91477	0.788235	-3.34271	0.000829657	0.00440154
620	Ccl20	ENSMUSG00000026166.14	14.7273	-4.69813	0.812658	-5.32699	9.98547e-08	1.82619e-06
621	Cyp27a1	ENSMUSG00000026170.6	208.057	-1.88497	0.579782	-3.26862	0.00108075	0.00546287
622	Igfbp5	ENSMUSG00000026185.8	6433.83	-3.1278	0.630499	-5.03124	4.87327e-07	7.33688e-06
623	Slc23a3	ENSMUSG00000026205.8	23.5477	-1.9984	0.548484	-3.61384	0.000301693	0.00188855
624	Bok	ENSMUSG00000026278.14	217.267	-1.07514	0.439368	-2.44894	0.0143277	0.0448945
625	Pdcd1	ENSMUSG00000026285.7	354.8	-3.78383	0.632481	-6.03113	1.62816e-09	4.66923e-08
626	Lypd1	ENSMUSG00000026344.9	91.506	-3.45389	0.938902	-3.81238	0.000137636	0.000971136
627	Tmem163	ENSMUSG00000026347.13	44.4401	-2.09673	0.820137	-2.67837	0.00739819	0.0264238
628	Rgs18	ENSMUSG00000026357.3	23.3791	-2.02469	0.673829	-3.00823	0.00262774	0.011377
629	Rgs2	ENSMUSG00000026360.9	651.307	-2.18239	0.507196	-4.31411	1.60249e-05	0.000155694
630	Tfcp2l1	ENSMUSG00000026380.10	129.346	-2.00565	0.719685	-2.82703	0.00469822	0.0183315
631	Sctr	ENSMUSG00000026387.15	22.6048	-2.39314	0.963582	-2.9018	0.00371029	0.0150994
632	Cacna1s	ENSMUSG00000026407.17	49.7071	-3.36638	0.752156	-4.2193	2.45064e-05	0.000223883
633	Pigr	ENSMUSG00000026417.13	42.0106	-3.19257	0.619369	-5.0307	4.88687e-07	7.3517e-06
634	Cdk18	ENSMUSG00000026437.11	69.9821	-1.80301	0.465599	-3.86908	0.000109245	0.000798425
635	Stx6	ENSMUSG00000026470.14	2968.94	-1.35654	0.290447	-4.67084	2.99966e-06	3.68829e-05
636	Mr1	ENSMUSG00000026471.14	1742.5	-2.20491	0.316656	-6.96393	3.30919e-12	1.72061e-10
637	Fam129a	ENSMUSG00000026483.13	656.962	-1.75	0.272074	-6.43329	1.2487e-10	4.60609e-09
638	Rgs7	ENSMUSG00000026527.13	36.6308	-3.04028	0.877995	-3.61356	0.000302024	0.00188974
639	Xcl1	ENSMUSG00000026573.7	40.6034	-2.38277	0.569378	-4.15675	3.22802e-05	0.000283149
640	Axdnd1	ENSMUSG00000026601.14	684.825	-1.36528	0.533055	-2.56785	0.0102331	0.0342919
641	Esrrg	ENSMUSG00000026610.13	34.7992	-3.29761	0.829549	-3.74471	0.000180602	0.00122531
642	Mark1	ENSMUSG00000026620.11	76.6897	-1.55905	0.296902	-5.24653	1.54987e-07	2.68887e-06
643	Marc1	ENSMUSG00000026621.13	40.4384	-3.72877	0.513586	-6.84191	7.81425e-12	3.78856e-10
644	Atf3	ENSMUSG00000026628.13	110.861	-1.81144	0.597591	-3.03829	0.00237925	0.0104892
645	Batf3	ENSMUSG00000026630.9	85.9626	-2.56666	0.596664	-4.31136	1.62254e-05	0.000157253
646	Lamb3	ENSMUSG00000026639.18	765.084	-2.1692	0.397189	-5.46462	4.63908e-08	9.28147e-07
647	Olah	ENSMUSG00000026645.11	3.10079	-2.21816	0.949188	-2.55549	0.0106039	0.0352929
648	Ucma	ENSMUSG00000026668.10	9.7925	-2.39733	0.816007	-2.86762	0.00413576	0.016485
649	Mgst3	ENSMUSG00000026688.5	189.391	-1.04719	0.364313	-2.87419	0.00405059	0.0162062
650	Fmo3	ENSMUSG00000026691.10	4.73446	-2.77068	0.871314	-3.34836	0.000812909	0.00432786
651	Serpinc1	ENSMUSG00000026715.12	30.3821	-2.05382	0.597128	-3.43574	0.000590935	0.00333563
652	Pip4k2a	ENSMUSG00000026737.12	3793.58	-1.96434	0.129051	-15.2211	2.56236e-52	3.86069e-49
653	Kif5c	ENSMUSG00000026764.15	75.118	-1.34459	0.411141	-3.27527	0.00105562	0.0053552
654	Lypd6b	ENSMUSG00000026765.12	271.857	-3.65365	0.690188	-5.35394	8.60579e-08	1.60535e-06
655	Itga8	ENSMUSG00000026768.10	22.8376	-2.21765	0.520764	-4.20388	2.62377e-05	0.000236937
656	Fam129b	ENSMUSG00000026796.16	475.34	-1.04399	0.290351	-3.59544	0.000323845	0.00200163
657	Cytip	ENSMUSG00000026832.12	3451.37	-2.35647	0.303117	-7.776	7.48545e-15	6.31972e-13
658	Acvr1c	ENSMUSG00000026834.13	108.878	-3.32301	0.779738	-4.37457	1.21671e-05	0.00012292
659	Traf1	ENSMUSG00000026875.14	842.03	-4.11345	0.488821	-8.42333	3.65945e-17	4.3441e-15
660	Gsn	ENSMUSG00000026879.14	5279.39	-2.07779	0.454181	-4.5797	4.65648e-06	5.39045e-05
661	Gca	ENSMUSG00000026893.4	89.5961	-1.09514	0.431451	-2.54387	0.0109631	0.0362297
662	Lcn4	ENSMUSG00000026919.1	25.8422	-2.09208	0.651935	-3.20064	0.00137123	0.00668114
663	Psd4	ENSMUSG00000026979.16	3876.55	-1.42014	0.119524	-11.8816	1.47563e-32	7.81168e-30
664	Ly75	ENSMUSG00000026980.15	1973.5	-2.01416	0.394472	-5.10879	3.24234e-07	5.1648e-06
665	Il1f5	ENSMUSG00000026983.10	2.64895	-3.10752	0.92268	-3.27023	0.0010746	0.00543882
666	Il1f6	ENSMUSG00000026984.4	2.38089	-2.70329	0.951561	-2.80271	0.00506759	0.0195468
667	Dapl1	ENSMUSG00000026989.5	94.0146	-1.99817	0.76946	-2.70066	0.00692026	0.0250041
668	Itga4	ENSMUSG00000027009.18	2801.75	-4.2961	0.264838	-16.2095	4.3218e-59	8.46511e-56
669	Stk39	ENSMUSG00000027030.15	231.619	-2.6145	0.261893	-9.96438	2.18223e-23	5.47991e-21
670	Slc43a1	ENSMUSG00000027075.16	1611.44	-2.10658	0.395018	-5.33475	9.56753e-08	1.75637e-06
671	Smtnl1	ENSMUSG00000027077.7	7.67478	-3.41823	0.860259	-4.01831	5.8616e-05	0.000472863
672	Ube2l6	ENSMUSG00000027078.14	310.768	-1.81465	0.540096	-3.3743	0.000740036	0.00401182
673	Slc12a6	ENSMUSG00000027130.15	78.5998	-1.54306	0.316792	-4.86753	1.13e-06	1.55868e-05
674	Depdc7	ENSMUSG00000027173.7	26.5678	-1.60473	0.522383	-3.06889	0.00214855	0.00965662
675	Sema6d	ENSMUSG00000027200.17	303.7	-1.07979	0.268044	-4.03092	5.55599e-05	0.000453016
676	Meis2	ENSMUSG00000027210.20	240.676	-2.28046	0.471524	-4.84305	1.27864e-06	1.74164e-05
677	Syt13	ENSMUSG00000027220.2	1798.58	-1.68088	0.580237	-2.90261	0.00370066	0.0150633
678	Chst1	ENSMUSG00000027221.5	175.87	-1.93329	0.705856	-2.78494	0.00535374	0.0204572
679	Mdk	ENSMUSG00000027239.14	101.812	-1.26556	0.397497	-3.18394	0.00145286	0.00700572
680	Itpka	ENSMUSG00000027296.7	47.9687	-1.0064	0.292341	-3.4379	0.000586254	0.00331494
681	Ptpra	ENSMUSG00000027303.17	2325.69	-1.08882	0.155571	-6.99897	2.57852e-12	1.36871e-10
682	4930402H24Rik	ENSMUSG00000027309.18	852.171	-1.0826	0.216679	-4.99663	5.834e-07	8.60471e-06
683	Dll4	ENSMUSG00000027314.6	161.858	-1.78647	0.30144	-5.92441	3.13426e-09	8.37527e-08
684	Spint1	ENSMUSG00000027315.13	288.519	-2.13394	0.67788	-3.17262	0.00151068	0.00723818
685	Gfra4	ENSMUSG00000027316.15	22.022	-1.62363	0.454659	-3.54864	0.000387232	0.00233232
686	Adam33	ENSMUSG00000027318.17	44.1451	-1.95808	0.742074	-2.6915	0.0071132	0.0255879
687	Rassf2	ENSMUSG00000027339.15	3399.56	-2.7929	0.323252	-8.64295	5.47796e-18	7.34909e-16
688	Rasgrp1	ENSMUSG00000027347.18	6362.99	-4.4798	0.48235	-9.31718	1.19477e-20	2.27204e-18
689	Slc27a2	ENSMUSG00000027359.16	161.87	-2.73555	0.874971	-3.48132	0.000498943	0.00288536
690	Hdc	ENSMUSG00000027360.5	123.566	-3.57732	0.475514	-7.44488	9.70356e-14	6.70879e-12
691	Dusp2	ENSMUSG00000027368.6	852.052	-1.58654	0.265927	-5.96627	2.42735e-09	6.66824e-08
692	Prom2	ENSMUSG00000027376.15	57.5669	-2.61711	0.780113	-3.39628	0.000683082	0.00375855
693	Acoxl	ENSMUSG00000027380.10	40.8281	-1.59555	0.530676	-3.01323	0.00258479	0.0112316
694	Pdyn	ENSMUSG00000027400.11	5.66024	-2.77474	0.87907	-3.01158	0.00259888	0.0112795
695	Tgm3	ENSMUSG00000027401.9	6.54748	-3.8664	0.822251	-4.48894	7.15776e-06	7.76296e-05
696	Cst3	ENSMUSG00000027447.6	3467.94	-2.04544	0.335726	-6.09476	1.09602e-09	3.24777e-08
697	Rbm38	ENSMUSG00000027510.17	3054.15	-1.3118	0.207657	-6.31712	2.66485e-10	9.14124e-09
698	Pck1	ENSMUSG00000027513.11	3194.44	-2.60995	0.932708	-3.36377	0.00076885	0.00413835
699	Zdbf2	ENSMUSG00000027520.15	9.92861	-2.27548	0.894721	-2.53156	0.0113556	0.0373128
700	Chmp4c	ENSMUSG00000027536.6	86.5845	-2.09286	0.745846	-2.84261	0.00447464	0.0175676
701	Nfatc2	ENSMUSG00000027544.16	419.637	-1.65025	0.506871	-3.2627	0.00110355	0.00556805
702	Car3	ENSMUSG00000027559.5	7091.69	-3.27058	0.902222	-4.2719	1.93814e-05	0.000183393
703	Car2	ENSMUSG00000027562.12	140.668	-3.63201	0.413613	-8.66439	4.53955e-18	6.2617e-16
704	Nkain4	ENSMUSG00000027574.15	110.651	-3.18531	0.770715	-4.22185	2.42307e-05	0.000221779
705	Zbtb46	ENSMUSG00000027583.13	169.517	-2.199	0.488791	-4.50815	6.5396e-06	7.20422e-05
706	Map1lc3a	ENSMUSG00000027602.9	381.935	-1.56094	0.411471	-3.79468	0.000147835	0.00103283
707	Epb41l1	ENSMUSG00000027624.17	227.521	-1.66018	0.60902	-2.73461	0.00624542	0.0231159
708	Samhd1	ENSMUSG00000027639.16	2020.87	-2.79528	0.560859	-5.01455	5.31564e-07	7.92973e-06
709	Src	ENSMUSG00000027646.15	317.675	-1.56015	0.447414	-3.49055	0.000482033	0.00279833
710	Anxa5	ENSMUSG00000027712.13	3267.68	-1.1623	0.204665	-5.67911	1.35398e-08	3.12005e-07
711	Il21	ENSMUSG00000027718.8	11.5666	-4.11536	0.836969	-4.73096	2.23456e-06	2.84265e-05
712	Slc7a11	ENSMUSG00000027737.10	1422.02	-5.25117	0.471191	-11.1351	8.46114e-29	3.74292e-26
713	Aadac	ENSMUSG00000027761.4	4.65703	-2.97123	0.858355	-3.56596	0.000362526	0.00221278
714	Sucnr1	ENSMUSG00000027762.6	13.1616	-2.7353	0.888056	-3.04251	0.00234614	0.0103675
715	P2ry1	ENSMUSG00000027765.6	42.6399	-2.89395	0.512891	-5.52456	3.3031e-08	6.88969e-07
716	Il12a	ENSMUSG00000027776.12	24.8934	-2.6891	0.749272	-3.48829	0.000486123	0.00282124
717	Sis	ENSMUSG00000027790.14	3.06046	-2.43125	0.955118	-2.69768	0.00698256	0.0252013
718	Bche	ENSMUSG00000027792.11	119.791	-3.93467	0.622436	-6.27161	3.57335e-10	1.19643e-08
719	Smad9	ENSMUSG00000027796.2	15.1722	-1.92947	0.757904	-2.56303	0.0103764	0.034689
720	Mme	ENSMUSG00000027820.12	161.891	-3.61179	0.850428	-4.59448	4.33826e-06	5.07304e-05
721	Wnt2b	ENSMUSG00000027840.5	39.762	-2.52967	0.858481	-3.07238	0.00212362	0.00957097
722	Vangl1	ENSMUSG00000027860.15	91.1572	-1.19325	0.3613	-3.30718	0.000942402	0.00488717
723	Stxbp3	ENSMUSG00000027882.18	951.338	-1.00325	0.18293	-5.48447	4.14722e-08	8.36577e-07
724	Crct1	ENSMUSG00000027913.5	2.14935	-2.44532	0.972928	-2.47853	0.0131925	0.0420574
725	Slc27a3	ENSMUSG00000027932.14	106.788	-1.50716	0.328637	-4.58352	4.57215e-06	5.30537e-05
726	Lrrc39	ENSMUSG00000027961.7	26.1833	-2.7217	0.84125	-3.26184	0.0011069	0.00558066
727	Vcam1	ENSMUSG00000027962.14	3508.56	-1.35458	0.438214	-3.09479	0.00196953	0.00899863
728	Mcub	ENSMUSG00000027994.14	115.865	-2.07168	0.414675	-4.99273	5.95305e-07	8.74736e-06
729	Tdo2	ENSMUSG00000028011.16	6.60493	-2.48277	0.877631	-2.81556	0.0048693	0.0188936
730	Enpep	ENSMUSG00000028024.14	426.569	-5.34871	0.448416	-11.7058	1.19084e-31	5.83124e-29
731	Ptgfr	ENSMUSG00000028036.6	23.2836	-2.09278	0.9365	-2.47693	0.0132517	0.0422052
732	Ifi44	ENSMUSG00000028037.13	362.058	-5.02209	0.472941	-10.3938	2.64621e-25	8.3599e-23
733	Efna3	ENSMUSG00000028039.11	6.37728	-2.61441	0.879149	-2.76674	0.00566206	0.0213892
734	Zbtb7b	ENSMUSG00000028042.15	655.114	-2.91906	0.463889	-6.29975	2.98135e-10	1.01206e-08
735	Sema4a	ENSMUSG00000028064.17	794.257	-2.43021	0.64708	-3.7971	0.000146397	0.00102556
736	Sh2d2a	ENSMUSG00000028071.12	2611.43	-1.6295	0.354255	-4.60106	4.20353e-06	4.93021e-05
737	Fmo5	ENSMUSG00000028088.14	191.615	-1.27345	0.274452	-4.64105	3.4665e-06	4.17322e-05
738	Nudt17	ENSMUSG00000028100.11	79.8304	-2.1652	0.590068	-3.6778	0.000235253	0.00152782
739	Celf3	ENSMUSG00000028137.9	5.25109	-3.18565	0.837171	-3.8437	0.000121191	0.000870469
740	Rorc	ENSMUSG00000028150.14	6755.36	-2.92126	0.417815	-6.99708	2.61351e-12	1.38354e-10
741	Cth	ENSMUSG00000028179.12	60.8026	-1.56072	0.650403	-2.40812	0.016035	0.0491284
742	Trp53inp1	ENSMUSG00000028211.11	15545.9	-1.98225	0.35798	-5.5394	3.03503e-08	6.40594e-07
743	Cdh17	ENSMUSG00000028217.11	30.2513	-1.92274	0.747996	-2.60318	0.00923646	0.0315843
744	Calb1	ENSMUSG00000028222.2	2.52649	-2.32563	0.958409	-2.54786	0.0108387	0.0359034
745	Clca1	ENSMUSG00000028255.6	7.54035	-3.56312	0.848757	-4.17507	2.97892e-05	0.000264377
746	Clca3a2	ENSMUSG00000028262.13	56.9613	-4.112	0.703434	-5.58637	2.31866e-08	5.00724e-07
747	Spaca1	ENSMUSG00000028264.16	17.7641	-3.15563	0.725716	-4.08228	4.45957e-05	0.000373928
748	Gbp2	ENSMUSG00000028270.12	1187.13	-1.43128	0.364223	-3.93294	8.3912e-05	0.000638915
749	Cfap206	ENSMUSG00000028294.15	1.89183	-2.5887	0.934839	-2.76088	0.00576466	0.0216972
750	3110043O21Rik	ENSMUSG00000028300.14	271.191	-1.83126	0.325881	-5.61956	1.91449e-08	4.20377e-07
751	Aldob	ENSMUSG00000028307.9	24.3269	-2.10749	0.93892	-3.09154	0.0019912	0.00906806
752	Hemgn	ENSMUSG00000028332.13	86.3899	-2.07111	0.438587	-4.71604	2.40477e-06	3.02519e-05
753	Nr4a3	ENSMUSG00000028341.9	308.171	-5.00113	0.413119	-11.8258	2.87044e-32	1.47956e-29
754	Orm3	ENSMUSG00000028359.4	6.64252	-2.25929	0.920046	-2.40338	0.0162441	0.049637
755	Tnfsf8	ENSMUSG00000028362.2	166.402	-1.93484	0.619161	-3.16406	0.00155583	0.00739842
756	Tnc	ENSMUSG00000028364.15	2971.92	-1.96754	0.597539	-3.306	0.000946385	0.00490522
757	Astn2	ENSMUSG00000028373.16	17.0689	-1.38658	0.558789	-2.49274	0.012676	0.0406958
758	Ugcg	ENSMUSG00000028381.8	1937.74	-1.30813	0.310024	-4.22011	2.44185e-05	0.000223191
759	Slc46a2	ENSMUSG00000028386.1	590.591	-3.26371	0.813926	-4.231	2.32658e-05	0.000214349
760	Bspry	ENSMUSG00000028392.15	105.153	-2.79634	0.495126	-5.63535	1.74702e-08	3.86653e-07
761	Dmac1	ENSMUSG00000028398.8	646.248	-1.00302	0.138749	-7.22908	4.86292e-13	2.93981e-11
762	Ptprd	ENSMUSG00000028399.18	141.04	-2.32124	0.522511	-4.45179	8.51567e-06	9.00143e-05
763	Aqp7	ENSMUSG00000028427.13	153.647	-2.72208	0.930151	-3.5627	0.000367055	0.00223308
764	Epb41l4b	ENSMUSG00000028434.12	222.874	-3.44299	0.423016	-8.10984	5.06883e-16	5.06547e-14
765	Aqp3	ENSMUSG00000028435.8	61.1341	-2.36783	0.639342	-3.71337	0.000204514	0.00136577
766	Unc13b	ENSMUSG00000028456.18	194.581	-1.55452	0.509025	-3.06393	0.00218453	0.00980038
767	Atp8b5	ENSMUSG00000028457.18	4.93145	-2.45615	0.832817	-2.69278	0.00708591	0.0254991
768	Bnc2	ENSMUSG00000028487.18	27.689	-1.96545	0.525434	-3.7185	0.000200407	0.00134109
769	Plin2	ENSMUSG00000028494.12	1600.03	-1.06456	0.432965	-2.45997	0.0138948	0.0438594
770	Plpp3	ENSMUSG00000028517.8	543.239	-1.71099	0.221881	-7.71097	1.24868e-14	1.02764e-12
771	Mier1	ENSMUSG00000028522.16	6346.65	-1.76081	0.379815	-4.63772	3.52271e-06	4.2279e-05
772	Tctex1d1	ENSMUSG00000028523.13	220.21	-3.58457	0.637708	-5.64717	1.63113e-08	3.65548e-07
773	Cachd1	ENSMUSG00000028532.14	148.293	-3.21879	0.424432	-7.55167	4.29704e-14	3.15229e-12
774	2610528J11Rik	ENSMUSG00000028536.12	10.3115	-2.34464	0.722289	-3.10026	0.00193354	0.00886938
775	Ttc39a	ENSMUSG00000028555.15	128.722	-3.34367	0.439859	-7.54191	4.63126e-14	3.35972e-12
776	Cyp2j13	ENSMUSG00000028571.15	3.18381	-2.93783	0.902773	-3.29369	0.000988819	0.00508347
777	Dmrtb1	ENSMUSG00000028610.16	11.6329	-3.93444	0.75794	-4.89026	1.00705e-06	1.40693e-05
778	Lrrc42	ENSMUSG00000028617.10	1744.88	-1.00367	0.319941	-3.13713	0.00170609	0.0080022
779	Tfap2c	ENSMUSG00000028640.11	5.77809	-3.03929	0.906327	-3.50745	0.000452418	0.00266032
780	Mycl	ENSMUSG00000028654.13	143.369	-2.01863	0.458564	-4.40726	1.04687e-05	0.000107921
781	Pithd1	ENSMUSG00000028669.15	1544.33	-1.19612	0.303223	-3.94457	7.99438e-05	0.000614063
782	Tspan1	ENSMUSG00000028699.9	6.89362	-3.79361	0.829744	-4.41133	1.02739e-05	0.000106136
783	Pdzk1ip1	ENSMUSG00000028716.15	13.232	-2.35746	0.737251	-3.14075	0.00168514	0.00792291
784	Pax7	ENSMUSG00000028736.13	17.02	-4.72471	0.75482	-5.60398	2.09489e-08	4.55851e-07
785	Pla2g2f	ENSMUSG00000028749.7	10.9816	-3.88941	0.852212	-4.49672	6.90098e-06	7.54294e-05
786	Vwa5b1	ENSMUSG00000028753.12	2.57594	-2.85761	0.920167	-3.10534	0.00190063	0.00875737
787	Fabp3	ENSMUSG00000028773.8	118.224	-2.2413	0.97185	-3.67425	0.000238552	0.00154668
788	Gnat3	ENSMUSG00000028777.8	5.54425	-3.05971	0.850743	-3.28523	0.00101899	0.00520036
789	Tmem54	ENSMUSG00000028786.15	9.42081	-2.21715	0.725892	-2.97011	0.00297693	0.0126128
790	Rnf19b	ENSMUSG00000028793.15	891.811	-1.15915	0.400629	-2.89501	0.00379147	0.0153482
791	Csmd2	ENSMUSG00000028804.19	12.0922	-2.40752	0.677895	-3.40981	0.000650073	0.00361322
792	Tmem50a	ENSMUSG00000028822.11	2243.57	-1.05284	0.181118	-5.81305	6.13448e-09	1.528e-07
793	Trim63	ENSMUSG00000028834.13	36.646	-1.94063	0.950728	-2.52949	0.0114228	0.0374923
794	Slc30a2	ENSMUSG00000028836.14	29.9612	-1.61223	0.617308	-2.61489	0.00892561	0.0307701
795	Cnksr1	ENSMUSG00000028841.14	47.6563	-2.13026	0.521799	-4.06746	4.75286e-05	0.000394969
796	Sh3bgrl3	ENSMUSG00000028843.8	2008	-1.08066	0.194402	-5.55892	2.71453e-08	5.76675e-07
797	Rspo1	ENSMUSG00000028871.7	77.9837	-2.72202	0.748089	-3.69862	0.000216775	0.00142769
798	Epb41	ENSMUSG00000028906.16	5574.68	-1.1368	0.397044	-2.86413	0.00418156	0.0166168
799	Tmub1	ENSMUSG00000028958.14	367.664	-1.11359	0.151075	-7.37046	1.70036e-13	1.12517e-11
800	Tnfrsf9	ENSMUSG00000028965.13	178.653	-3.55518	0.347323	-10.1397	3.68187e-24	1.01573e-21
801	Slc2a5	ENSMUSG00000028976.10	14.1048	-2.50289	0.952325	-2.94996	0.00317819	0.0132987
802	H6pd	ENSMUSG00000028980.14	2513.91	-1.35499	0.172913	-7.83641	4.63598e-15	4.10882e-13
803	Trp73	ENSMUSG00000029026.16	10.9767	-1.89333	0.692527	-2.70181	0.00689633	0.0249336
804	Arhgef16	ENSMUSG00000029032.12	211.462	-3.81268	0.666579	-5.75168	8.83599e-09	2.11062e-07
805	Prkcz	ENSMUSG00000029053.16	122.95	-1.34484	0.433091	-3.10768	0.00188564	0.00870264
806	Gabrd	ENSMUSG00000029054.8	7.59593	-2.1957	0.824987	-2.67867	0.00739156	0.026405
807	Fam213b	ENSMUSG00000029059.9	683.911	-3.2079	0.499992	-6.42554	1.31402e-10	4.81981e-09
808	Tnfrsf4	ENSMUSG00000029075.6	152.265	-1.5345	0.414929	-3.69822	0.000217119	0.001429
809	Htra3	ENSMUSG00000029096.15	297.153	-2.38779	0.728858	-3.31402	0.000919647	0.00479327
810	Ppp2r2c	ENSMUSG00000029120.10	7.34458	-2.03365	0.764854	-2.49339	0.0126529	0.0406458
811	Crmp1	ENSMUSG00000029121.15	45.1505	-3.0862	0.483563	-6.21565	5.1114e-10	1.63858e-08
812	Plb1	ENSMUSG00000029134.14	54.1897	-2.09244	0.65904	-3.17996	0.00147297	0.00708525
813	Ociad2	ENSMUSG00000029153.11	278.031	-1.52766	0.555038	-2.75582	0.0058545	0.0219763
814	Klf3	ENSMUSG00000029178.14	2529.14	-1.35647	0.270541	-5.01416	5.3265e-07	7.93989e-06
815	Slc34a2	ENSMUSG00000029188.14	22.3594	-2.48273	0.729733	-3.39033	0.000698073	0.0038268
816	Klb	ENSMUSG00000029195.10	57.4277	-2.22889	0.922813	-2.77236	0.00556507	0.0211018
817	Chrna9	ENSMUSG00000029205.12	2814.68	-4.8764	0.535287	-9.15578	5.39667e-20	9.35439e-18
818	Tec	ENSMUSG00000029217.16	833.869	-2.81505	0.300711	-9.35898	8.05098e-21	1.54602e-18
819	Lnx1	ENSMUSG00000029228.15	47.7025	-1.89535	0.382778	-4.93262	8.11344e-07	1.15745e-05
820	Ugt2b34	ENSMUSG00000029260.15	2.45273	-2.11723	0.934695	-2.45074	0.0142563	0.0446996
821	Sult1e1	ENSMUSG00000029272.8	19.3297	-2.19085	0.96906	-3.09201	0.00198805	0.00906459
822	Tgfbr3	ENSMUSG00000029287.14	772.774	-3.72662	0.291003	-12.7845	2.00053e-37	1.50709e-34
823	Abcg3	ENSMUSG00000029299.14	1452.48	-3.51931	0.203981	-17.2416	1.29406e-66	2.8163e-63
824	Plac8	ENSMUSG00000029322.12	728.514	-1.65764	0.660635	-2.53932	0.0111067	0.0366118
825	Cds1	ENSMUSG00000029330.8	444.057	-4.43395	0.463787	-9.52394	1.66733e-21	3.58879e-19
826	Bmp3	ENSMUSG00000029335.5	18.8437	-4.17364	0.703418	-4.75549	1.97962e-06	2.56871e-05
827	Antxr2	ENSMUSG00000029338.13	391.517	-1.18636	0.244591	-4.85189	1.22289e-06	1.67619e-05
828	Afm	ENSMUSG00000029369.17	10.473	-3.21226	0.736682	-3.7255	0.00019493	0.00130958
829	Rassf6	ENSMUSG00000029370.10	66.6627	-4.32229	0.558744	-7.23391	4.693e-13	2.85471e-11
830	Areg	ENSMUSG00000029378.5	1.75247	-2.2941	0.960014	-2.40569	0.016142	0.049379
831	Cxcl1	ENSMUSG00000029380.11	9.07076	-1.64098	0.660393	-2.45456	0.0141055	0.0443547
832	Ccng2	ENSMUSG00000029385.14	3307.77	-1.08606	0.261273	-4.1569	3.226e-05	0.000283149
833	Cdkl2	ENSMUSG00000029403.14	69.3834	-2.17092	0.368987	-5.86322	4.53983e-09	1.17621e-07
834	Ppef2	ENSMUSG00000029410.11	26.5937	-2.42282	0.595807	-4.02077	5.80074e-05	0.0004695
835	Naaa	ENSMUSG00000029413.14	530.198	-1.2383	0.465154	-2.6663	0.00766901	0.0271535
836	Cxcl9	ENSMUSG00000029417.9	260.187	-3.16068	0.661083	-4.85345	1.21329e-06	1.66536e-05
837	Pla2g1b	ENSMUSG00000029522.12	1.37803	-2.40533	0.947413	-2.48572	0.0129291	0.0413253
838	Hnf1a	ENSMUSG00000029556.12	26.1221	-3.3529	0.737459	-4.33957	1.42759e-05	0.00014101
839	Oasl2	ENSMUSG00000029561.17	761.486	-3.85844	0.215268	-17.8803	1.67877e-71	5.48035e-68
840	Fscn1	ENSMUSG00000029581.14	1167.39	-1.70814	0.570277	-3.00933	0.00261826	0.011341
841	Iqcd	ENSMUSG00000029601.13	114.184	-1.2132	0.49581	-2.44683	0.0144119	0.045072
842	Wasf3	ENSMUSG00000029636.10	29.5011	-2.67129	0.50844	-5.10765	3.26186e-07	5.18588e-06
843	Glcci1	ENSMUSG00000029638.17	39.1008	-3.68655	0.579418	-6.07765	1.21954e-09	3.58129e-08
844	Slc46a3	ENSMUSG00000029650.10	174.716	-1.37894	0.465725	-2.96795	0.00299796	0.0126854
845	Hsph1	ENSMUSG00000029657.15	3029.16	-1.71291	0.624049	-2.75002	0.00595909	0.0222749
846	Medag	ENSMUSG00000029659.16	76.8487	-1.22864	0.43055	-2.85316	0.00432874	0.0170963
847	Tspan12	ENSMUSG00000029669.14	164.105	-1.96852	0.726904	-2.74548	0.00604222	0.0225212
848	Epo	ENSMUSG00000029711.13	32.7859	-1.01724	0.400093	-2.53726	0.0111723	0.0368219
849	Agfg2	ENSMUSG00000029722.15	2578.24	-1.77759	0.355313	-5.00364	5.62565e-07	8.32423e-06
850	Tsc22d4	ENSMUSG00000029723.16	5877.15	-1.50308	0.277625	-5.41428	6.15342e-08	1.19689e-06
851	Cyp3a13	ENSMUSG00000029727.7	5.16015	-3.26327	0.83231	-3.92144	8.8023e-05	0.00066414
852	Dlx5	ENSMUSG00000029755.10	8.43994	-4.06998	0.809953	-4.7457	2.07782e-06	2.67399e-05
853	Dync1i1	ENSMUSG00000029757.16	55.592	-2.58349	0.796488	-3.2888	0.00100617	0.0051554
854	Irf5	ENSMUSG00000029771.12	562.172	-1.46308	0.577325	-2.54578	0.0109033	0.0360627
855	Sspo	ENSMUSG00000029797.13	158.115	-5.2026	0.558397	-8.74587	2.213e-18	3.11842e-16
856	Aoc1	ENSMUSG00000029811.14	25.2684	-3.3857	0.729841	-4.4437	8.84254e-06	9.29677e-05
857	Tcaf2	ENSMUSG00000029851.5	297.052	-3.83771	0.445459	-8.58914	8.76206e-18	1.13657e-15
858	Epha1	ENSMUSG00000029859.6	111.347	-1.87944	0.683968	-2.77251	0.00556252	0.0210986
859	Ccdc184	ENSMUSG00000029875.4	6.61138	-3.03154	0.88247	-3.60527	0.000311834	0.00194086
860	Rab19	ENSMUSG00000029923.4	250.438	-2.88229	0.409852	-7.02681	2.11306e-12	1.1465e-10
861	Reg3g	ENSMUSG00000030017.2	72.7366	-5.01096	0.787825	-5.51722	3.44409e-08	7.13855e-07
862	Adamts9	ENSMUSG00000030022.14	207.105	-1.6084	0.344343	-4.67222	2.97968e-06	3.67062e-05
863	Bmp10	ENSMUSG00000030046.6	6.55448	-2.22248	0.851337	-2.63607	0.00838727	0.02919
864	NA	ENSMUSG00000030068.4	58.3426	-1.7997	0.379453	-4.73446	2.19643e-06	2.80636e-05
865	Chl1	ENSMUSG00000030077.11	117.246	-2.03406	0.629826	-3.24317	0.00118206	0.00590339
866	Klf15	ENSMUSG00000030087.11	250.062	-3.13828	0.747497	-4.30506	1.66938e-05	0.000160916
867	Slc6a13	ENSMUSG00000030108.14	27.4592	-3.35234	0.517654	-6.06974	1.28118e-09	3.75103e-08
868	Ret	ENSMUSG00000030110.13	35.7895	-2.15295	0.672765	-3.20794	0.00133687	0.00654545
869	Ptms	ENSMUSG00000030122.12	4266.89	-1.3086	0.134633	-9.71969	2.48526e-22	5.59527e-20
870	Plxnd1	ENSMUSG00000030123.15	7121.09	-2.8983	0.489973	-5.92644	3.09571e-09	8.28356e-08
871	Lag3	ENSMUSG00000030124.2	281.372	-1.17162	0.44797	-2.61839	0.00883445	0.0305132
872	Rasgef1a	ENSMUSG00000030134.11	42.1954	-2.12121	0.814618	-2.63687	0.00836747	0.0291366
873	Klrk1	ENSMUSG00000030149.15	79.2416	-3.38935	0.658023	-5.12132	3.03401e-07	4.89112e-06
874	Cd69	ENSMUSG00000030156.5	846.536	-4.53524	0.336374	-13.4364	3.69991e-41	3.6235e-38
875	Clec2d	ENSMUSG00000030157.5	1025.02	-3.48463	0.324211	-10.7434	6.36782e-27	2.35333e-24
876	Gabarapl1	ENSMUSG00000030161.8	842.21	-1.17527	0.353451	-3.32582	0.000881593	0.00463067
877	Klrd1	ENSMUSG00000030165.16	78.0164	-2.54437	0.713468	-3.60121	0.000316744	0.00196847
878	Klrc1	ENSMUSG00000030167.15	12.2809	-2.79052	0.920797	-3.41434	0.000639368	0.00356586
879	Klra5	ENSMUSG00000030173.15	10.8099	-3.00737	0.751295	-3.49837	0.000468107	0.00272963
880	Klra13-ps	ENSMUSG00000030178.15	17.037	-4.62305	0.881196	-4.52021	6.17775e-06	6.87911e-05
881	Plbd1	ENSMUSG00000030214.6	795.82	-2.1303	0.43805	-4.87082	1.11136e-06	1.53731e-05
882	Art4	ENSMUSG00000030217.2	458.431	-1.63043	0.678054	-2.42058	0.0154957	0.0478729
883	Bhlhe41	ENSMUSG00000030256.11	270.883	-1.7854	0.52565	-3.40359	0.00066507	0.00368195
884	Cidec	ENSMUSG00000030278.11	1495.1	-3.39035	0.910681	-4.29961	1.71101e-05	0.000164686
885	Il17rc	ENSMUSG00000030281.16	73.3455	-1.74949	0.416557	-4.19716	2.70282e-05	0.000243403
886	Atp2b2	ENSMUSG00000030302.16	5.59263	-2.48004	0.848549	-2.81065	0.00494416	0.0191386
887	Dennd5b	ENSMUSG00000030313.15	165.002	-1.79811	0.629752	-2.88657	0.00389462	0.0156864
888	Timp4	ENSMUSG00000030317.8	101.711	-3.27199	0.747949	-4.43851	9.05857e-06	9.50349e-05
889	Klrb1c	ENSMUSG00000030325.16	55.6381	-4.23424	0.608971	-6.52416	6.83858e-11	2.67895e-09
890	Ltbr	ENSMUSG00000030339.7	347.259	-1.38162	0.261567	-5.28212	1.27701e-07	2.28219e-06
891	Scnn1a	ENSMUSG00000030340.16	400.74	-4.13148	0.52347	-7.88471	3.1526e-15	2.87209e-13
892	Tnfrsf1a	ENSMUSG00000030341.17	1701.37	-1.32126	0.226579	-5.8314	5.49658e-09	1.39458e-07
893	Klrb1a	ENSMUSG00000030361.16	16.8303	-2.72042	0.752642	-3.37622	0.000734888	0.00398954
894	Dmpk	ENSMUSG00000030409.15	320.074	-2.57622	0.416091	-6.19273	5.91296e-10	1.85902e-08
895	Ceacam18	ENSMUSG00000030472.9	3.6002	-2.48636	0.918919	-2.60111	0.00929233	0.0317199
896	Lypd5	ENSMUSG00000030484.5	2.50754	-2.58558	0.966792	-2.678	0.00740638	0.0264425
897	Rhpn2	ENSMUSG00000030494.13	69.7213	-1.98257	0.606655	-3.28626	0.00101526	0.00518806
898	Slc7a10	ENSMUSG00000030495.12	58.6017	-4.78216	0.829824	-5.19079	2.094e-07	3.50258e-06
899	Kctd15	ENSMUSG00000030499.9	117.638	-2.14503	0.455844	-4.70481	2.54097e-06	3.17129e-05
900	Cers3	ENSMUSG00000030510.11	20.841	-2.47407	0.559874	-4.29199	1.77082e-05	0.000169743
901	Pcsk6	ENSMUSG00000030513.14	112.834	-2.64561	0.665644	-4.00195	6.28214e-05	0.000500196
902	Apba2	ENSMUSG00000030519.14	173.165	-5.51798	0.662531	-7.83031	4.86655e-15	4.25541e-13
903	Plin1	ENSMUSG00000030546.14	1176.29	-3.04088	0.934355	-4.07713	4.55951e-05	0.00038084
904	Synm	ENSMUSG00000030554.16	929.643	-3.08352	0.662917	-4.70705	2.51323e-06	3.14346e-05
905	Ttc23	ENSMUSG00000030555.16	160.889	-1.03669	0.349427	-2.96781	0.00299925	0.0126854
906	Mef2a	ENSMUSG00000030557.17	2857.52	-1.63435	0.240968	-6.78276	1.17898e-11	5.49827e-10
907	Rab38	ENSMUSG00000030559.8	29.1252	-1.99003	0.550622	-3.59793	0.000320765	0.00198887
908	Rab30	ENSMUSG00000030643.14	108.257	-2.37013	0.672549	-3.57623	0.000348584	0.00213901
909	Calcb	ENSMUSG00000030666.11	62.7455	-4.86089	0.671133	-6.60859	3.87988e-11	1.61349e-09
910	Calca	ENSMUSG00000030669.13	13.0497	-2.05961	0.758175	-2.70425	0.00684595	0.0248088
911	Cyp2r1	ENSMUSG00000030670.16	21.6015	-2.38727	0.61177	-3.78363	0.000154555	0.00106895
912	Pde3b	ENSMUSG00000030671.9	1168.2	-1.93222	0.776705	-2.54069	0.0110634	0.0365058
913	Mylpf	ENSMUSG00000030672.12	399.6	-1.44672	0.388625	-3.7233	0.000196634	0.00131945
914	Qprt	ENSMUSG00000030674.5	94.4545	-1.48678	0.341042	-4.36046	1.29791e-05	0.000129738
915	Tbx6	ENSMUSG00000030699.16	149.482	-2.67534	0.417589	-6.39458	1.60989e-10	5.74369e-09
916	Plekhb1	ENSMUSG00000030701.17	279.262	-4.39775	0.697605	-6.36805	1.91452e-10	6.72039e-09
917	Coro1a	ENSMUSG00000030707.15	16204.6	-1.33931	0.140066	-9.56202	1.15477e-21	2.51317e-19
918	Sult1a1	ENSMUSG00000030711.15	208.571	-2.13546	0.509058	-4.20421	2.61996e-05	0.000236703
919	Klk7	ENSMUSG00000030713.6	12.3907	-1.9163	0.688826	-2.74267	0.00609424	0.0226763
920	Pgm2l1	ENSMUSG00000030729.17	1173.95	-1.35325	0.392021	-3.45271	0.000554986	0.00316371
921	Slco2b1	ENSMUSG00000030737.17	618.297	-1.81445	0.578097	-3.15328	0.00161445	0.0076456
922	Spns1	ENSMUSG00000030741.15	1665.1	-1.04994	0.256942	-4.08624	4.3843e-05	0.000368563
923	Dgat2	ENSMUSG00000030747.5	1612.93	-2.99501	0.852818	-3.74856	0.00017785	0.00121167
924	Il4ra	ENSMUSG00000030748.9	3114.49	-1.7937	0.318264	-5.63705	1.72988e-08	3.84163e-07
925	Parva	ENSMUSG00000030770.15	329.73	-1.00622	0.384994	-2.6152	0.00891756	0.0307569
926	Trat1	ENSMUSG00000030775.9	1089.87	-4.83635	0.664195	-7.40004	1.36146e-13	9.16392e-12
927	Lyve1	ENSMUSG00000030787.4	222.716	-1.87604	0.869522	-2.40997	0.0159539	0.0489489
928	Adm	ENSMUSG00000030790.15	116.35	-1.75169	0.523117	-3.35425	0.000795795	0.00425648
929	Pycard	ENSMUSG00000030793.4	1886	-1.45076	0.176	-8.24293	1.68051e-16	1.76968e-14
930	Prss8	ENSMUSG00000030800.10	31.3059	-2.37942	0.599257	-3.94144	8.09929e-05	0.000621147
931	Fgf21	ENSMUSG00000030827.5	20.8868	-4.14462	0.746664	-4.6121	3.98628e-06	4.71208e-05
932	Itgal	ENSMUSG00000030830.18	8080.6	-1.73096	0.340143	-5.09055	3.57019e-07	5.60781e-06
933	Fgfr2	ENSMUSG00000030849.18	635.093	-1.23664	0.275865	-4.48326	7.35129e-06	7.95963e-05
934	Ptpn5	ENSMUSG00000030854.17	20.3453	-4.97813	0.734789	-5.91653	3.28797e-09	8.73832e-08
935	Chp2	ENSMUSG00000030865.4	45.0267	-2.45857	0.453341	-5.35642	8.48881e-08	1.58655e-06
936	Scnn1b	ENSMUSG00000030873.9	42.1014	-2.77009	0.819183	-3.46811	0.000524123	0.00300703
937	Vwa3a	ENSMUSG00000030889.14	14.292	-1.94587	0.745922	-2.60273	0.00924857	0.0316086
938	Anks4b	ENSMUSG00000030909.6	7.56554	-3.44664	0.870773	-4.00611	6.17275e-05	0.000493291
939	Zp2	ENSMUSG00000030911.7	5.75467	-3.63491	0.848658	-4.17769	2.94482e-05	0.000261937
940	Trim30a	ENSMUSG00000030921.17	1370.71	-1.93066	0.560008	-3.46658	0.000527126	0.0030216
941	Acsm3	ENSMUSG00000030935.15	146.252	-2.90292	0.905409	-3.80307	0.000142915	0.00100441
942	Gp2	ENSMUSG00000030954.10	47.7399	-5.85486	0.747711	-6.68504	2.30862e-11	1.01388e-09
943	Acsm5	ENSMUSG00000030972.6	11.488	-2.47971	0.968382	-3.1905	0.00142025	0.00688046
944	Art1	ENSMUSG00000030996.8	241	-2.41537	0.799879	-3.10824	0.00188204	0.00869014
945	Stk33	ENSMUSG00000031027.15	19.7277	-2.86211	0.843387	-3.34425	0.000825066	0.00438431
946	Fgf3	ENSMUSG00000031074.14	3.84557	-2.91458	0.872536	-3.42822	0.000607562	0.00341277
947	Tnni2	ENSMUSG00000031097.15	23.0377	-1.73961	0.57823	-3.00669	0.00264112	0.0114198
948	Syt8	ENSMUSG00000031098.18	4.83347	-2.24617	0.775535	-2.69933	0.00694789	0.0250854
949	Smarca1	ENSMUSG00000031099.16	45.5538	-1.73476	0.633873	-2.74719	0.00601087	0.02243
950	Gpc4	ENSMUSG00000031119.4	99.3811	-1.38936	0.404505	-3.43755	0.000587005	0.00331823
951	Cd40lg	ENSMUSG00000031132.1	87.4679	-5.8021	0.598457	-6.84394	7.70418e-12	3.74446e-10
952	Heph	ENSMUSG00000031209.14	65.6422	-2.49244	0.450085	-5.51329	3.52187e-08	7.26135e-07
953	Efnb1	ENSMUSG00000031217.8	146.18	-1.35022	0.325523	-4.14828	3.34981e-05	0.000292784
954	Itm2a	ENSMUSG00000031239.5	2300.24	-2.44026	0.367664	-6.63924	3.15301e-11	1.34256e-09
955	Tnmd	ENSMUSG00000031250.8	4.71206	-2.23487	0.963828	-2.42528	0.0152966	0.0473858
956	Nox1	ENSMUSG00000031257.14	87.8051	-1.68331	0.357447	-4.70625	2.52312e-06	3.15382e-05
957	Serpina7	ENSMUSG00000031271.14	6.28904	-2.33174	0.828014	-2.69568	0.00702445	0.0253385
958	Pak3	ENSMUSG00000031284.16	43.6487	-2.9746	0.612269	-4.80959	1.51241e-06	2.01384e-05
959	Il13ra2	ENSMUSG00000031289.10	23.5543	-2.613	0.70924	-3.63164	0.000281627	0.00177885
960	Lrch2	ENSMUSG00000031290.14	34.0439	-2.22694	0.629797	-3.53526	0.000407381	0.00242977
961	Map3k15	ENSMUSG00000031303.8	100.69	-1.22789	0.271875	-4.51504	6.33044e-06	7.01327e-05
962	Car5b	ENSMUSG00000031373.4	198.23	-3.2348	0.823296	-4.16139	3.1631e-05	0.000278578
963	Pir	ENSMUSG00000031379.13	23.7977	-1.33533	0.552706	-2.4248	0.0153168	0.0474323
964	Arhgap4	ENSMUSG00000031389.17	3662.8	-2.0475	0.308509	-6.63788	3.1823e-11	1.34917e-09
965	L1cam	ENSMUSG00000031391.18	197.083	-1.48361	0.299895	-4.94683	7.54301e-07	1.07843e-05
966	Zcchc18	ENSMUSG00000031428.11	61.6719	-1.80829	0.780887	-2.40824	0.0160298	0.04912
967	Tsc22d3	ENSMUSG00000031431.13	3262.64	-1.69429	0.675198	-2.51514	0.0118984	0.0387005
968	Rnf128	ENSMUSG00000031438.11	125.282	-1.80119	0.579736	-3.10954	0.00187381	0.00865619
969	Proz	ENSMUSG00000031445.5	6.68421	-2.04113	0.754535	-2.49677	0.0125332	0.0403231
970	Gas6	ENSMUSG00000031451.6	2548.42	-3.01316	0.412495	-7.31137	2.64432e-13	1.68163e-11
971	Adrb3	ENSMUSG00000031489.15	236.162	-3.94745	0.873647	-4.93171	8.15123e-07	1.16115e-05
972	Cd209a	ENSMUSG00000031494.7	45.0981	-3.7435	0.709973	-5.02574	5.01492e-07	7.52122e-06
973	Cd209d	ENSMUSG00000031495.8	38.8526	-3.20816	0.608732	-5.09143	3.55381e-07	5.59554e-06
974	Sfrp1	ENSMUSG00000031548.7	512.142	-2.88994	0.426957	-6.77226	1.26783e-11	5.8846e-10
975	Hpgd	ENSMUSG00000031613.9	988.328	-3.20338	0.595458	-5.42699	5.73137e-08	1.12711e-06
976	Anxa10	ENSMUSG00000031635.14	5.6291	-3.28376	0.858213	-3.85868	0.000114001	0.00082671
977	Pdlim3	ENSMUSG00000031636.7	53.6561	-2.14431	0.533613	-4.01634	5.91101e-05	0.00047626
978	Rbl2	ENSMUSG00000031666.15	2264.04	-1.06822	0.180483	-5.9189	3.24095e-09	8.63681e-08
979	Tbc1d9	ENSMUSG00000031709.15	430.268	-1.56423	0.519092	-3.02113	0.00251833	0.011003
980	Ucp1	ENSMUSG00000031710.4	2220.82	-2.08842	0.980211	-3.28226	0.0010298	0.00524594
981	Il15	ENSMUSG00000031712.10	89.5416	-2.41571	0.496985	-4.85818	1.18468e-06	1.62838e-05
982	Ces1f	ENSMUSG00000031725.8	80.1409	-3.85814	0.835719	-4.72062	2.35126e-06	2.9655e-05
983	Cdyl2	ENSMUSG00000031758.10	285.918	-2.83256	0.378099	-7.4835	7.23699e-14	5.06253e-12
984	Cx3cl1	ENSMUSG00000031778.13	270.481	-1.4994	0.507619	-2.95648	0.00311169	0.0130712
985	Ccl22	ENSMUSG00000031779.3	602.958	-6.2402	0.490886	-12.2156	2.56537e-34	1.52266e-31
986	Ccl17	ENSMUSG00000031780.2	40.0925	-3.45757	0.569373	-5.77275	7.79864e-09	1.90227e-07
987	Drc7	ENSMUSG00000031786.7	10.5219	-3.28217	0.807153	-3.70064	0.000215059	0.00141817
988	Pgr	ENSMUSG00000031870.16	157.119	-3.56327	0.781832	-4.74389	2.09656e-06	2.69458e-05
989	Ces2g	ENSMUSG00000031877.9	108.526	-1.5921	0.518622	-3.07782	0.00208521	0.00942605
990	Rrad	ENSMUSG00000031880.7	219.819	-1.98569	0.426185	-4.66306	3.11536e-06	3.81379e-05
991	Has3	ENSMUSG00000031910.14	52.168	-1.88441	0.629512	-3.00459	0.0026594	0.0114861
992	Gpr83	ENSMUSG00000031932.14	102.373	-2.78116	0.604843	-4.60275	4.16954e-06	4.90208e-05
993	Izumo1r	ENSMUSG00000031933.17	257.893	-2.75875	0.464334	-5.94246	2.80781e-09	7.58275e-08
994	Hephl1	ENSMUSG00000031936.9	3.52225	-2.46043	0.938359	-2.52327	0.0116268	0.0380382
995	Tmem170	ENSMUSG00000031953.2	200.081	-1.11538	0.181367	-6.14838	7.82799e-10	2.4108e-08
996	Ctrb1	ENSMUSG00000031957.6	4.30291	-3.0721	0.924948	-3.38848	0.000702812	0.00384632
997	Dbndd1	ENSMUSG00000031970.16	11.5228	-2.58855	0.635725	-3.89942	9.64217e-05	0.000718103
998	Acta1	ENSMUSG00000031972.5	9.36052	-2.55946	0.648315	-3.78365	0.000154542	0.00106895
999	Agt	ENSMUSG00000031980.9	25.238	-3.10387	0.872647	-3.50703	0.000453143	0.00266378
1000	St14	ENSMUSG00000031995.9	293.304	-2.19787	0.410061	-5.36293	8.18847e-08	1.54071e-06
1001	Aplp2	ENSMUSG00000031996.17	3405.24	-1.23958	0.310456	-3.99348	6.51093e-05	0.000515896
1002	Nectin1	ENSMUSG00000032012.8	535.524	-2.67513	0.391804	-6.82812	8.60348e-12	4.14045e-10
1003	Trim29	ENSMUSG00000032013.6	694.865	-1.93684	0.826711	-2.41586	0.0156981	0.0483306
1004	Pou2f3	ENSMUSG00000032015.16	28.3661	-1.6318	0.552399	-2.94709	0.00320785	0.0134142
1005	Ubash3b	ENSMUSG00000032020.15	263.181	-1.40261	0.39641	-3.54202	0.000397069	0.00238069
1006	Crtam	ENSMUSG00000032021.14	52.3528	-3.13722	0.717395	-4.25114	2.12689e-05	0.000198284
1007	Ets1	ENSMUSG00000032035.15	21301.7	-1.06898	0.188233	-5.67913	1.35378e-08	3.12005e-07
1008	Kirrel3	ENSMUSG00000032036.15	16.0038	-2.49205	0.575639	-4.18726	2.82344e-05	0.000252986
1009	2310030G06Rik	ENSMUSG00000032062.2	29.0365	-1.56804	0.645917	-2.43238	0.0149998	0.0466722
1010	Apoa4	ENSMUSG00000032080.6	26.5485	-4.99317	0.767459	-5.83504	5.37784e-09	1.37268e-07
1011	Apoc3	ENSMUSG00000032081.10	10.477	-2.35059	0.928076	-3.02834	0.00245904	0.01078
1012	Dscaml1	ENSMUSG00000032087.10	44.7314	-4.0562	0.606246	-6.16784	6.92281e-10	2.14213e-08
1013	Il10ra	ENSMUSG00000032089.16	800.856	-1.49192	0.579322	-2.58593	0.00971173	0.0329278
1014	Tmprss4	ENSMUSG00000032091.15	113.286	-1.78516	0.626319	-2.85877	0.0042529	0.0168558
1015	Slc37a2	ENSMUSG00000032122.15	939.3	-2.62483	0.269061	-9.75401	1.77319e-22	4.1347e-20
1016	Lysmd2	ENSMUSG00000032184.5	104.072	-3.77115	0.532395	-6.96382	3.31174e-12	1.72061e-10
1017	Tmod2	ENSMUSG00000032186.15	43.0491	-1.75253	0.637362	-2.7802	0.00543253	0.0207098
1018	Lipc	ENSMUSG00000032207.10	15.4623	-2.4374	0.875468	-2.75367	0.00589319	0.0220792
1019	Cgnl1	ENSMUSG00000032232.14	373.563	-1.75626	0.691102	-2.57567	0.0100047	0.0336879
1020	Rora	ENSMUSG00000032238.17	256.326	-1.84207	0.317126	-5.80875	6.29403e-09	1.56052e-07
1021	Calml4	ENSMUSG00000032246.14	16.0211	-1.74669	0.642093	-2.71261	0.00667558	0.0243219
1022	Lca5	ENSMUSG00000032258.15	189.797	-2.04603	0.45552	-4.49652	6.9076e-06	7.54596e-05
1023	Sh3bgrl2	ENSMUSG00000032261.16	170.731	-1.6774	0.407957	-4.11396	3.88922e-05	0.000331065
1024	Acsbg1	ENSMUSG00000032281.11	52.522	-2.48979	0.547461	-4.52691	5.98511e-06	6.71672e-05
1025	Thsd4	ENSMUSG00000032289.15	94.3587	-1.83556	0.361344	-5.07626	3.84934e-07	5.96967e-06
1026	Clk3	ENSMUSG00000032316.8	7183.06	-1.20556	0.346009	-3.48435	0.000493325	0.00285727
1027	Isl2	ENSMUSG00000032318.12	17.1526	-2.63772	0.809787	-3.23332	0.00122362	0.00607529
1028	Pstpip1	ENSMUSG00000032322.14	1967.16	-1.63176	0.197273	-8.27139	1.32402e-16	1.43394e-14
1029	Cyp11a1	ENSMUSG00000032323.13	36.1684	-2.48055	0.46523	-5.26114	1.43161e-07	2.5194e-06
1030	Hcn4	ENSMUSG00000032338.9	25.364	-4.43849	0.8116	-5.22413	1.74973e-07	2.98017e-06
1031	Impg1	ENSMUSG00000032343.15	4.93927	-3.15151	0.875387	-3.66154	0.000250701	0.00161105
1032	Ooep	ENSMUSG00000032346.7	4.86199	-2.16484	0.816568	-2.51464	0.0119153	0.0387488
1033	Rbpms2	ENSMUSG00000032387.15	49.6069	-2.68174	0.793519	-3.44277	0.000575788	0.00326708
1034	Lctl	ENSMUSG00000032401.15	80.7465	-3.33763	0.920068	-3.953	7.71761e-05	0.000596076
1035	Me1	ENSMUSG00000032418.15	882.697	-4.3364	0.757711	-5.98869	2.11535e-09	5.90219e-08
1036	Zfp949	ENSMUSG00000032425.15	382.434	-1.59096	0.319755	-4.97481	6.53104e-07	9.50397e-06
1037	Cmtm6	ENSMUSG00000032434.9	2578.26	-1.04219	0.125389	-8.31183	9.42368e-17	1.04283e-14
1038	Mras	ENSMUSG00000032470.16	225.726	-1.72581	0.25813	-6.68439	2.31889e-11	1.01611e-09
1039	Ngp	ENSMUSG00000032484.8	53.6677	-3.23685	0.868432	-3.93078	8.4671e-05	0.000643309
1040	Ltf	ENSMUSG00000032496.7	74.7544	-2.83519	0.792587	-3.69802	0.000217285	0.00142909
1041	Stac	ENSMUSG00000032502.8	22.7088	-3.41714	0.710792	-4.47205	7.74745e-06	8.30139e-05
1042	Slc25a38	ENSMUSG00000032519.11	520.464	-1.02328	0.163656	-6.2525	4.03943e-10	1.33199e-08
1043	Vipr1	ENSMUSG00000032528.5	152.764	-2.53839	0.528366	-4.80786	1.52556e-06	2.0286e-05
1044	Cck	ENSMUSG00000032532.7	8.02319	-3.26921	0.877558	-3.85046	0.000117898	0.000851814
1045	Slco2a1	ENSMUSG00000032548.14	560.307	-2.09368	0.525239	-3.9945	6.48319e-05	0.000514114
1046	Cpne4	ENSMUSG00000032564.16	7.21178	-2.9249	0.791387	-3.26771	0.0010842	0.0054775
1047	Col6a4	ENSMUSG00000032572.9	51.8064	-2.29452	0.805142	-2.99004	0.00278937	0.0119578
1048	Cish	ENSMUSG00000032578.7	308.544	-2.98885	0.48419	-6.17504	6.61457e-10	2.06305e-08
1049	Mst1r	ENSMUSG00000032584.12	66.9286	-1.94581	0.713605	-2.7389	0.00616447	0.0228811
1050	Mst1	ENSMUSG00000032591.15	31.008	-3.45802	0.62847	-5.29815	1.1698e-07	2.11178e-06
1051	Uba7	ENSMUSG00000032596.14	1541.24	-1.04833	0.395386	-2.65305	0.00797687	0.0280609
1052	1700102P08Rik	ENSMUSG00000032611.9	35.7188	-1.15391	0.420851	-2.73488	0.00624027	0.0231012
1053	Oas1d	ENSMUSG00000032623.9	3.25792	-3.11159	0.886668	-3.47481	0.000511214	0.00294245
1054	Colgalt2	ENSMUSG00000032649.14	16.7311	-1.7319	0.507382	-3.37864	0.000728459	0.00395816
1055	Crebl2	ENSMUSG00000032652.13	469.036	-1.45803	0.205738	-7.08701	1.3704e-12	7.78031e-11
1056	March3	ENSMUSG00000032656.14	70.5482	-1.30906	0.434884	-3.01436	0.0025752	0.0112075
1057	Oas3	ENSMUSG00000032661.9	344.476	-3.53633	0.760892	-4.81917	1.44153e-06	1.92996e-05
1058	Cd59a	ENSMUSG00000032679.12	75.1883	-2.06612	0.77949	-2.71221	0.00668362	0.0243331
1059	Malt1	ENSMUSG00000032688.7	1037.97	-1.31376	0.340491	-3.85998	0.000113397	0.000823332
1060	Oas2	ENSMUSG00000032690.16	341.418	-3.01836	0.69214	-4.44244	8.89455e-06	9.34643e-05
1061	2810474O19Rik	ENSMUSG00000032712.16	1949.16	-1.07155	0.278906	-3.8423	0.000121889	0.000874518
1062	Ablim3	ENSMUSG00000032735.14	156.686	-2.17534	0.584231	-3.74248	0.000182215	0.00123454
1063	Srxn1	ENSMUSG00000032802.8	489.339	-3.67369	0.465871	-7.87822	3.3209e-15	3.01141e-13
1064	Alox12b	ENSMUSG00000032807.5	3.03349	-2.4063	0.923646	-2.78326	0.00538155	0.0205434
1065	Igdcc4	ENSMUSG00000032816.15	179.212	-3.06826	0.477675	-6.41213	1.43497e-10	5.19534e-09
1066	Ppp1r9a	ENSMUSG00000032827.15	94.4208	-2.58498	0.518878	-4.97678	6.46503e-07	9.42191e-06
1067	Trpc1	ENSMUSG00000032839.13	55.6188	-2.40421	0.417274	-5.72296	1.04681e-08	2.47035e-07
1068	Prr5l	ENSMUSG00000032841.15	113.184	-1.20006	0.492959	-2.4401	0.014683	0.0458175
1069	Rag2	ENSMUSG00000032864.4	3595.5	-2.91808	0.582892	-5.02607	5.00633e-07	7.51409e-06
1070	Smap2	ENSMUSG00000032870.8	2368.34	-1.0091	0.293092	-3.44344	0.000574366	0.0032609
1071	Styk1	ENSMUSG00000032899.14	25.7932	-4.49614	0.623677	-6.44723	1.13911e-10	4.24178e-09
1072	Ucp3	ENSMUSG00000032942.14	138.583	-2.38555	0.785926	-3.11276	0.0018535	0.00858058
1073	Rasgrp2	ENSMUSG00000032946.16	2537.53	-2.22969	0.241696	-9.22523	2.82945e-20	5.20946e-18
1074	Cdo1	ENSMUSG00000033022.7	1142.43	-2.52264	0.765318	-3.36692	0.000760128	0.00410607
1075	Klra9	ENSMUSG00000033024.16	19.8662	-6.40554	0.806202	-6.62118	3.56336e-11	1.49136e-09
1076	Klrc3	ENSMUSG00000033027.15	3.55161	-2.1794	0.907401	-2.66966	0.00759287	0.0269374
1077	Lmo7	ENSMUSG00000033060.15	341.756	-3.273	0.395553	-8.26112	1.44311e-16	1.55309e-14
1078	Resp18	ENSMUSG00000033061.15	8.27728	-3.68586	0.806368	-4.449	8.62696e-06	9.09942e-05
1079	Podxl2	ENSMUSG00000033152.13	381.819	-1.98757	0.465738	-4.26893	1.96417e-05	0.000185229
1080	Mgll	ENSMUSG00000033174.17	1402.5	-2.09898	0.661534	-3.19573	0.00139477	0.00677731
1081	Tpsg1	ENSMUSG00000033200.16	2.11177	-2.34879	0.921008	-2.64993	0.00805082	0.02825
1082	AA467197	ENSMUSG00000033213.16	98.7037	-1.95869	0.558883	-3.50501	0.000456591	0.00267522
1083	Hsf4	ENSMUSG00000033249.10	44.3037	-1.25029	0.330081	-3.78168	0.000155772	0.00107623
1084	Dpyd	ENSMUSG00000033308.16	118.672	-3.55807	0.449274	-7.7827	7.09917e-15	6.04572e-13
1085	Galnt9	ENSMUSG00000033316.14	10.1524	-2.70797	0.712584	-3.5649	0.000363996	0.00221898
1086	Tnxb	ENSMUSG00000033327.16	183.893	-2.1107	0.805638	-2.7124	0.00667984	0.0243284
1087	Rtp4	ENSMUSG00000033355.6	395.259	-2.00352	0.559709	-3.5956	0.000323649	0.00200104
1088	Prrg3	ENSMUSG00000033361.13	250.032	-2.29976	0.53821	-4.2833	1.84143e-05	0.000175685
1089	Arhgap44	ENSMUSG00000033389.16	123.623	-3.36451	0.384936	-8.6564	4.86909e-18	6.62297e-16
1090	Snap91	ENSMUSG00000033419.15	166.308	-6.14814	0.625589	-8.33211	7.94128e-17	8.88833e-15
1091	Lpar6	ENSMUSG00000033446.7	1588.54	-1.65675	0.446492	-3.71219	0.000205471	0.00137123
1092	Tagap	ENSMUSG00000033450.7	189.205	-2.06735	0.500366	-4.13984	3.4755e-05	0.000301215
1093	Cysltr2	ENSMUSG00000033470.11	156.284	-3.30326	0.576641	-5.71152	1.11974e-08	2.62348e-07
1094	Strc	ENSMUSG00000033498.14	226.454	-2.19389	0.658574	-3.41878	0.000629027	0.00351219
1095	Asprv1	ENSMUSG00000033508.7	83.2967	-3.56168	0.550845	-6.37402	1.84137e-10	6.49854e-09
1096	Casp4	ENSMUSG00000033538.13	128.443	-2.61821	0.510688	-5.12777	2.93199e-07	4.75011e-06
1097	Znrf1	ENSMUSG00000033545.14	8608.24	-1.21405	0.481835	-2.52042	0.0117216	0.0382653
1098	Apol6	ENSMUSG00000033576.11	153.15	-2.80978	0.866215	-3.38311	0.0007167	0.00390704
1099	Myo6	ENSMUSG00000033577.18	289.52	-1.53796	0.280153	-5.48994	4.02072e-08	8.12733e-07
1100	Tmem35a	ENSMUSG00000033578.7	81.6655	-1.52115	0.605545	-2.5155	0.0118864	0.0386678
1101	Egr3	ENSMUSG00000033730.3	69.86	-3.40669	0.618875	-5.40295	6.55523e-08	1.26625e-06
1102	Mtss1l	ENSMUSG00000033763.14	466.072	-1.98613	0.453893	-4.37858	1.19455e-05	0.000121231
1103	Calm4	ENSMUSG00000033765.4	11.6798	-4.55036	0.806726	-5.19373	2.06119e-07	3.45655e-06
1104	B3galt2	ENSMUSG00000033849.3	132.04	-3.13556	0.840309	-4.0038	6.2334e-05	0.000496922
1105	Klf9	ENSMUSG00000033863.1	321.735	-1.87865	0.466033	-4.03676	5.41939e-05	0.000443398
1106	Dnah17	ENSMUSG00000033987.16	106.896	-1.91548	0.53788	-3.56586	0.000362671	0.00221297
1107	Cd226	ENSMUSG00000034028.15	265.071	-3.41032	0.607307	-5.64789	1.62428e-08	3.64848e-07
1108	Fgd5	ENSMUSG00000034037.14	203.537	-1.23352	0.38735	-3.1872	0.0014366	0.00694267
1109	Ptgdr2	ENSMUSG00000034117.3	5.51873	-2.17418	0.944119	-2.64555	0.00815584	0.0285367
1110	Tspan8	ENSMUSG00000034127.15	14.6619	-2.5581	0.658224	-3.77874	0.000157623	0.00108696
1111	Faah	ENSMUSG00000034171.13	979.829	-1.84011	0.216053	-8.51649	1.64456e-17	2.03874e-15
1112	Rnf43	ENSMUSG00000034177.15	147.188	-3.01759	0.403343	-7.44477	9.71139e-14	6.70879e-12
1113	Rasl10a	ENSMUSG00000034209.4	14.1565	-3.34962	0.741545	-3.88749	0.000101285	0.000748062
1114	Ankmy1	ENSMUSG00000034212.14	126.307	-2.0875	0.587296	-3.55839	0.00037313	0.0022612
1115	Rhov	ENSMUSG00000034226.7	17.9018	-1.74901	0.667119	-2.61165	0.00901069	0.0310151
1116	Tmem132c	ENSMUSG00000034324.16	10.3879	-2.13861	0.780393	-2.67336	0.00750964	0.0267293
1117	Ramp1	ENSMUSG00000034353.14	2289.83	-1.71796	0.321847	-5.3384	9.37722e-08	1.73275e-06
1118	Skint2	ENSMUSG00000034359.16	21.7227	-4.71532	0.82312	-5.38068	7.4205e-08	1.41662e-06
1119	Tmem30b	ENSMUSG00000034435.5	101.747	-2.24899	0.725326	-3.13425	0.00172294	0.00806454
1120	Gbp8	ENSMUSG00000034438.16	2413.43	-4.23658	0.496134	-8.56274	1.10217e-17	1.40184e-15
1121	Ifit1	ENSMUSG00000034459.8	451.321	-4.45455	0.486071	-9.11808	7.64699e-20	1.30245e-17
1122	Six4	ENSMUSG00000034460.9	81.5963	-2.26589	0.730346	-3.13539	0.00171623	0.00804013
1123	Dynlrb2	ENSMUSG00000034467.7	3.75092	-2.62831	0.899474	-3.09193	0.00198859	0.00906459
1124	Rasd2	ENSMUSG00000034472.13	21.0019	-1.58942	0.593246	-2.67182	0.00754407	0.026808
1125	Ptpn13	ENSMUSG00000034573.14	418.716	-1.23804	0.477937	-2.59426	0.00947939	0.0322909
1126	Exph5	ENSMUSG00000034584.3	30.2671	-2.13721	0.852018	-2.61501	0.00892261	0.0307689
1127	Tiparp	ENSMUSG00000034640.9	837.6	-1.30168	0.345512	-3.76804	0.000164532	0.00112998
1128	Fras1	ENSMUSG00000034687.8	44.5475	-1.86631	0.671308	-2.79653	0.00516545	0.0198654
1129	Dnaic2	ENSMUSG00000034706.16	16.1433	-2.33927	0.627774	-3.64657	0.000265768	0.00169508
1130	Mast4	ENSMUSG00000034751.16	736.821	-1.20527	0.300155	-4.01586	5.92304e-05	0.000477034
1131	Map4k5	ENSMUSG00000034761.15	682.448	-1.88423	0.271383	-6.94316	3.83415e-12	1.98152e-10
1132	Cd207	ENSMUSG00000034783.7	37.2311	-4.01286	0.822917	-4.45426	8.41814e-06	8.90314e-05
1133	Dio1	ENSMUSG00000034785.14	64.5565	-5.11175	0.684988	-6.32212	2.57995e-10	8.88109e-09
1134	Scn7a	ENSMUSG00000034810.7	222.147	-1.47172	0.577873	-2.55474	0.0106268	0.0353572
1135	Grip1	ENSMUSG00000034813.17	20.1821	-2.95754	0.693005	-4.11559	3.86195e-05	0.00032946
1136	Celf5	ENSMUSG00000034818.16	11.4824	-1.68095	0.673999	-2.47354	0.0133782	0.0425455
1137	Art3	ENSMUSG00000034842.16	210.687	-3.26597	0.634277	-5.17843	2.23761e-07	3.72372e-06
1138	Acot11	ENSMUSG00000034853.16	202.742	-2.56686	0.685666	-3.78806	0.000151826	0.00105342
1139	Mfsd12	ENSMUSG00000034854.8	731.135	-1.08815	0.320873	-3.39135	0.000695481	0.00381579
1140	Cxcl10	ENSMUSG00000034855.13	220.529	-5.41543	0.55566	-9.36083	7.91109e-21	1.5342e-18
1141	Fam214a	ENSMUSG00000034858.16	953.865	-1.07911	0.251995	-4.2829	1.84474e-05	0.000175914
1142	Gipc3	ENSMUSG00000034872.6	18.2172	-3.20598	0.648315	-4.51006	6.48079e-06	7.14748e-05
1143	Tbxa2r	ENSMUSG00000034881.8	1138.35	-2.55776	0.358613	-7.13314	9.81048e-13	5.66838e-11
1144	Sncb	ENSMUSG00000034891.13	2.78098	-2.40531	0.901148	-2.51672	0.0118454	0.0385602
1145	Mdga2	ENSMUSG00000034912.16	4.40163	-2.23247	0.892083	-2.80699	0.00500065	0.0193277
1146	Cdhr2	ENSMUSG00000034918.8	4.147	-2.68494	0.961411	-2.95399	0.00313691	0.0131569
1147	Ttc22	ENSMUSG00000034919.2	9.37691	-2.58985	0.795773	-3.09086	0.00199578	0.00908255
1148	Ly6g6f	ENSMUSG00000034923.9	1.56416	-2.71589	0.969443	-2.5766	0.00997782	0.0336335
1149	Arl4d	ENSMUSG00000034936.2	67.7761	-1.80031	0.720361	-2.52116	0.0116969	0.0381978
1150	Cebpa	ENSMUSG00000034957.10	841.552	-2.38411	0.596933	-4.01933	5.83647e-05	0.000471169
1151	Atcay	ENSMUSG00000034958.11	35.2624	-4.40285	0.668538	-5.17605	2.26633e-07	3.7683e-06
1152	Rubcnl	ENSMUSG00000034959.7	159.533	-1.75829	0.701449	-2.55488	0.0106226	0.035349
1153	Parm1	ENSMUSG00000034981.9	625.707	-1.76048	0.564663	-3.13089	0.00174279	0.00814316
1154	Htr2a	ENSMUSG00000034997.4	4.436	-1.95838	0.736041	-2.49064	0.0127515	0.0409113
1155	Ccl5	ENSMUSG00000035042.2	626.993	-4.38608	0.681223	-6.5571	5.4866e-11	2.18427e-09
1156	Fam167a	ENSMUSG00000035095.11	119.826	-2.63004	0.558122	-4.72017	2.35652e-06	2.97021e-05
1157	Wdr78	ENSMUSG00000035126.19	2813.72	-3.88618	0.418884	-9.28636	1.59659e-20	3.00696e-18
1158	Plekhh3	ENSMUSG00000035172.15	87.9979	-1.26944	0.487656	-2.60651	0.009147	0.0313824
1159	Ccdc186	ENSMUSG00000035173.14	748.624	-1.42629	0.356889	-3.99748	6.40217e-05	0.000508307
1160	Ubd	ENSMUSG00000035186.6	677.852	-7.51841	0.43553	-15.2389	1.95182e-52	3.18585e-49
1161	Arl6ip5	ENSMUSG00000035199.6	1887.81	-1.16515	0.135247	-8.61505	6.99114e-18	9.1903e-16
1162	Xrra1	ENSMUSG00000035211.9	201.587	-3.41231	0.542278	-6.28827	3.21022e-10	1.08598e-08
1163	Spcs2	ENSMUSG00000035227.7	3303.71	-1.11392	0.162756	-6.84417	7.69208e-12	3.74446e-10
1164	Lcat	ENSMUSG00000035237.7	44.6348	-1.06734	0.361821	-2.94451	0.00323462	0.013506
1165	Abi3bp	ENSMUSG00000035258.14	99.5896	-3.71531	0.529911	-6.82462	8.81602e-12	4.22199e-10
1166	Amh	ENSMUSG00000035262.5	26.6546	-1.45522	0.492827	-2.93784	0.00330513	0.013736
1167	Impg2	ENSMUSG00000035270.15	52.238	-1.0394	0.381917	-2.72098	0.0065089	0.0238522
1168	Tpbg	ENSMUSG00000035274.13	39.9992	-2.35257	0.71776	-3.28532	0.00101867	0.00520036
1169	Adrb1	ENSMUSG00000035283.4	34.6149	-2.31768	0.592921	-3.89069	9.99576e-05	0.000740215
1170	Sgcg	ENSMUSG00000035296.13	47.4578	-2.97256	0.908998	-3.6663	0.000246084	0.00158606
1171	Lzts2	ENSMUSG00000035342.13	352.592	-1.24469	0.514773	-2.42024	0.0155104	0.0479047
1172	Foxa1	ENSMUSG00000035451.7	7.35348	-2.49673	0.80499	-2.92591	0.00343449	0.0141773
1173	Galm	ENSMUSG00000035473.10	232.778	-1.85861	0.310947	-5.97643	2.2808e-09	6.30099e-08
1174	Ky	ENSMUSG00000035606.8	11.661	-3.10219	0.820247	-3.53985	0.000400359	0.00239372
1175	Tnfsf9	ENSMUSG00000035678.7	65.2033	-1.42335	0.254437	-5.58317	2.36176e-08	5.08908e-07
1176	Thrsp	ENSMUSG00000035686.8	1642.58	-3.85195	0.88921	-5.33841	9.37646e-08	1.73275e-06
1177	Isg15	ENSMUSG00000035692.6	377.872	-2.23047	0.594325	-3.77014	0.000163158	0.00112093
1178	Arhgap45	ENSMUSG00000035697.14	23662.8	-1.77049	0.338401	-5.23287	1.66894e-07	2.86751e-06
1179	Usp35	ENSMUSG00000035713.15	506.439	-2.18207	0.47965	-4.55479	5.24386e-06	5.98901e-05
1180	Krt20	ENSMUSG00000035775.2	10.387	-2.99788	0.639232	-4.23765	2.25874e-05	0.000208787
1181	Twist1	ENSMUSG00000035799.5	18.8008	-1.93647	0.744481	-2.61487	0.00892611	0.0307701
1182	Plekhs1	ENSMUSG00000035818.13	11.2725	-2.1069	0.732589	-2.82462	0.00473374	0.0184407
1183	Misp	ENSMUSG00000035852.11	81.6615	-2.9217	0.662122	-4.42086	9.83066e-06	0.000101934
1184	Tmprss11b	ENSMUSG00000035861.6	5.94188	-2.1715	0.904828	-2.50611	0.0122068	0.0395067
1185	Syt1	ENSMUSG00000035864.14	47.6279	-4.71936	0.585158	-6.8458	7.60495e-12	3.71467e-10
1186	Cerk	ENSMUSG00000035891.16	4119.28	-1.56816	0.351025	-4.46861	7.8731e-06	8.40842e-05
1187	Dennd5a	ENSMUSG00000035901.14	1088.4	-1.42108	0.364409	-3.90197	9.54146e-05	0.0007125
1188	Dcdc2a	ENSMUSG00000035910.15	5.66068	-2.89138	0.867097	-3.50681	0.000453508	0.00266456
1189	Ptprq	ENSMUSG00000035916.8	34.4052	-3.50569	0.784157	-4.36944	1.24563e-05	0.000125505
1190	Pknox2	ENSMUSG00000035934.16	40.7017	-1.53975	0.438422	-3.51258	0.00044377	0.0026189
1191	Acss3	ENSMUSG00000035948.13	160.431	-3.40767	0.807667	-4.40247	1.07028e-05	0.000109987
1192	Ascl3	ENSMUSG00000035951.2	2.87512	-2.44457	0.90831	-2.84342	0.00446327	0.0175406
1193	Nme5	ENSMUSG00000035984.14	5.2246	-2.69956	0.807578	-3.09866	0.00194398	0.00890682
1194	1810046K07Rik	ENSMUSG00000036027.11	5.74487	-3.04054	0.868098	-3.62017	0.000294412	0.00184829
1195	Slc2a6	ENSMUSG00000036067.12	62.8876	-2.57493	0.63914	-4.03602	5.43648e-05	0.000444425
1196	Tm6sf2	ENSMUSG00000036151.15	22.6904	-1.04542	0.395438	-2.63283	0.00846767	0.0293811
1197	Mgat5	ENSMUSG00000036155.13	2432.72	-1.27085	0.228379	-5.56473	2.62558e-08	5.58384e-07
1198	Sh3bp4	ENSMUSG00000036206.12	238.47	-1.78079	0.462871	-3.85176	0.000117274	0.000847618
1199	Lzts1	ENSMUSG00000036306.13	242.348	-1.32814	0.541105	-2.45828	0.0139603	0.0440167
1200	Slc18a1	ENSMUSG00000036330.12	15.5885	-3.05936	0.725444	-3.84688	0.000119632	0.000861428
1201	P2ry14	ENSMUSG00000036381.13	100.474	-1.3639	0.439178	-3.11132	0.0018625	0.00861614
1202	Gadd45a	ENSMUSG00000036390.8	199.14	-1.00848	0.297487	-3.38925	0.000700833	0.00383763
1203	Btg1	ENSMUSG00000036478.8	2933.37	-1.1778	0.248538	-4.73929	2.14472e-06	2.74925e-05
1204	Cdh8	ENSMUSG00000036510.17	9.34412	-2.33423	0.869072	-2.6513	0.00801837	0.0281563
1205	Card11	ENSMUSG00000036526.8	1445.96	-1.53203	0.58629	-2.62147	0.0087551	0.0302722
1206	Ppfibp2	ENSMUSG00000036528.15	161.584	-2.09005	0.471711	-4.43456	9.2262e-06	9.64835e-05
1207	Cdc42ep3	ENSMUSG00000036533.8	398.929	-1.14262	0.369204	-3.09578	0.00196297	0.00897703
1208	Fxyd1	ENSMUSG00000036570.14	113.085	-2.63062	0.815499	-3.36399	0.000768232	0.00413616
1209	Tex44	ENSMUSG00000036574.5	5.86042	-2.45582	0.853044	-2.80743	0.00499388	0.0193082
1210	Fgf1	ENSMUSG00000036585.15	241.975	-1.81392	0.627415	-2.90437	0.00367993	0.0150133
1211	Fut7	ENSMUSG00000036587.13	16.4652	-2.07694	0.852196	-2.52148	0.0116863	0.0381944
1212	H2-Aa	ENSMUSG00000036594.14	9581.98	-3.24718	0.480304	-6.78238	1.18211e-11	5.49974e-10
1213	Etl4	ENSMUSG00000036617.16	274.721	-2.01937	0.272916	-7.39713	1.39156e-13	9.33442e-12
1214	Ccdc148	ENSMUSG00000036641.8	94.0112	-1.78929	0.300091	-5.95593	2.58598e-09	7.06533e-08
1215	Tmem184a	ENSMUSG00000036687.13	33.5133	-1.53788	0.581302	-2.65228	0.0079951	0.0280997
1216	Zcchc12	ENSMUSG00000036699.12	130.043	-3.5803	0.670253	-5.34537	9.02316e-08	1.67523e-06
1217	Slc6a20a	ENSMUSG00000036814.13	22.4964	-3.81548	0.700194	-4.48108	7.42654e-06	8.0148e-05
1218	Lpar3	ENSMUSG00000036832.5	27.6335	-3.9322	0.611615	-5.36038	8.3047e-08	1.5566e-06
1219	Wnt4	ENSMUSG00000036856.4	399.204	-3.11219	0.728969	-4.34313	1.4047e-05	0.000139221
1220	Arhgef26	ENSMUSG00000036885.14	38.6901	-1.08757	0.344815	-3.15544	0.00160257	0.00759828
1221	Neto2	ENSMUSG00000036902.11	353.112	-1.42198	0.480881	-2.96073	0.00306911	0.0129307
1222	Mucl2	ENSMUSG00000036925.7	4.13708	-3.19987	0.910795	-3.52593	0.000421999	0.00250324
1223	Stag3	ENSMUSG00000036928.14	132.19	-2.65555	0.514968	-5.15545	2.53027e-07	4.16823e-06
1224	Nfkbid	ENSMUSG00000036931.14	555.11	-1.87061	0.220587	-8.47887	2.27385e-17	2.71572e-15
1225	Tmem71	ENSMUSG00000036944.5	442.542	-1.38511	0.369807	-3.74767	0.000178481	0.0012147
1226	Clca2	ENSMUSG00000036960.10	40.0477	-2.75176	0.737125	-3.74613	0.000179581	0.00122006
1227	Wnt8b	ENSMUSG00000036961.4	84.4683	-3.28876	0.565141	-5.77444	7.72076e-09	1.88797e-07
1228	Tns2	ENSMUSG00000037003.15	550.329	-1.556	0.466124	-3.34348	0.000827347	0.00439167
1229	Xpnpep2	ENSMUSG00000037005.16	20.4549	-3.24823	0.757388	-4.07412	4.61877e-05	0.000385133
1230	Pax1	ENSMUSG00000037034.15	1116.66	-3.10609	0.828724	-3.9355	8.30243e-05	0.000633501
1231	Scd1	ENSMUSG00000037071.2	33011.4	-3.2454	0.88864	-4.03397	5.48423e-05	0.000447768
1232	Prr32	ENSMUSG00000037086.3	25.8439	-4.80275	0.708895	-5.30376	1.13444e-07	2.05173e-06
1233	Tmprss13	ENSMUSG00000037129.7	18.3967	-2.67675	0.677852	-3.82475	0.000130906	0.000931031
1234	Aff3	ENSMUSG00000037138.17	1643.08	-1.16398	0.220783	-5.27235	1.34688e-07	2.39178e-06
1235	2210407C18Rik	ENSMUSG00000037145.14	15.2816	-4.42091	0.798558	-5.17234	2.31179e-07	3.83412e-06
1236	Grhl3	ENSMUSG00000037188.7	9.9513	-2.00778	0.703058	-2.79398	0.00520631	0.0199835
1237	Zfyve28	ENSMUSG00000037224.15	617.096	-1.95443	0.709277	-2.79443	0.00519915	0.0199639
1238	Mxd4	ENSMUSG00000037235.13	5652.55	-1.82902	0.245697	-7.44455	9.72735e-14	6.70879e-12
1239	Clic4	ENSMUSG00000037242.8	2374.59	-1.43368	0.352454	-4.06927	4.71598e-05	0.000392404
1240	Dzank1	ENSMUSG00000037259.15	26.7161	-1.79581	0.513004	-3.49241	0.000478689	0.00278387
1241	Traf3ip3	ENSMUSG00000037318.10	3525.2	-1.83997	0.308589	-5.96331	2.47183e-09	6.78091e-08
1242	NA	ENSMUSG00000037390.12	4.21388	-3.00593	0.862398	-3.56127	0.000369063	0.00224219
1243	Icam1	ENSMUSG00000037405.8	1219.19	-1.33829	0.368583	-3.63228	0.000280932	0.00177564
1244	Htra4	ENSMUSG00000037406.7	23.3205	-2.90065	0.773774	-3.68439	0.00022925	0.00149478
1245	Vgf	ENSMUSG00000037428.14	3.76153	-2.67666	0.832006	-2.96525	0.00302439	0.012778
1246	Vnn1	ENSMUSG00000037440.8	14.67	-2.03987	0.840774	-2.47595	0.0132883	0.0423147
1247	Fbxo27	ENSMUSG00000037463.14	137.842	-2.16389	0.62831	-3.49314	0.000477373	0.00277869
1248	Slc2a12	ENSMUSG00000037490.5	19.7103	-1.88381	0.605944	-3.09305	0.00198108	0.00904297
1249	Zmat4	ENSMUSG00000037492.16	5.93049	-2.41731	0.794618	-2.76245	0.00573697	0.0216096
1250	Cib2	ENSMUSG00000037493.6	165.128	-2.32555	0.761532	-3.12015	0.00180757	0.00840374
1251	Shank2	ENSMUSG00000037541.21	85.453	-3.8441	0.712285	-5.36471	8.10787e-08	1.5329e-06
1252	Plekhg2	ENSMUSG00000037552.17	2910.5	-1.2918	0.299768	-4.30973	1.63455e-05	0.000158182
1253	Tob1	ENSMUSG00000037573.5	537.991	-2.20652	0.378413	-5.83179	5.48373e-09	1.39312e-07
1254	Kcnh3	ENSMUSG00000037579.6	853.612	-2.4196	0.509905	-4.75197	2.0144e-06	2.60436e-05
1255	Kdf1	ENSMUSG00000037600.16	43.8028	-1.88664	0.731137	-2.60887	0.00908425	0.0312054
1256	Kcnk2	ENSMUSG00000037624.15	198.06	-4.39559	0.651983	-6.713	1.90657e-11	8.46802e-10
1257	Slc25a43	ENSMUSG00000037636.6	21.2816	-1.87707	0.685707	-2.75175	0.00592769	0.0221958
1258	Zbtb42	ENSMUSG00000037638.5	174.2	-1.36935	0.379799	-3.60676	0.000310046	0.00193342
1259	H2-DMa	ENSMUSG00000037649.9	919.518	-1.43969	0.536116	-2.69344	0.00707188	0.025472
1260	Gdf7	ENSMUSG00000037660.5	6.72048	-3.43881	0.862401	-4.00533	6.19298e-05	0.000494504
1261	Aspg	ENSMUSG00000037686.5	102.922	-3.60901	0.84075	-4.49638	6.91186e-06	7.54641e-05
1262	Ahdc1	ENSMUSG00000037692.14	1241.68	-1.36437	0.359488	-3.79601	0.000147041	0.0010286
1263	Fam13a	ENSMUSG00000037709.13	494.745	-2.05097	0.593192	-3.47676	0.000507511	0.00292629
1264	NA	ENSMUSG00000037735.7	24.1415	-3.81835	0.664039	-4.99227	5.96745e-07	8.76195e-06
1265	Limch1	ENSMUSG00000037736.18	199.608	-2.06754	0.531683	-3.89651	9.75874e-05	0.000725406
1266	Ppp1r16b	ENSMUSG00000037754.13	2481.4	-1.54972	0.582288	-2.66904	0.00760676	0.0269672
1267	Dzip1l	ENSMUSG00000037784.14	44.2796	-1.1948	0.356021	-3.35632	0.000789871	0.00422826
1268	D630003M21Rik	ENSMUSG00000037813.13	25.2997	-3.30404	0.620143	-5.00969	5.45189e-07	8.09599e-06
1269	Sh2d4b	ENSMUSG00000037833.13	281.826	-3.10502	0.52688	-5.90314	3.56644e-09	9.35153e-08
1270	LOC102639543	ENSMUSG00000037849.8	241.601	-3.5558	0.686879	-5.26089	1.4336e-07	2.52064e-06
1271	Cpe	ENSMUSG00000037852.8	232.069	-1.48238	0.620714	-2.40906	0.0159937	0.0490477
1272	Aim2	ENSMUSG00000037860.15	427.684	-2.32485	0.572605	-4.0855	4.3982e-05	0.000369415
1273	Egr2	ENSMUSG00000037868.15	362.097	-3.38495	0.359928	-9.38833	6.09577e-21	1.20604e-18
1274	Inpp4b	ENSMUSG00000037940.17	1101.63	-2.07144	0.602969	-3.45473	0.000550853	0.00314289
1275	Crp	ENSMUSG00000037942.5	21.4457	-4.64385	0.798404	-5.40733	6.39712e-08	1.2409e-06
1276	Muc5ac	ENSMUSG00000037974.16	2.94184	-2.97886	0.934859	-3.16458	0.00155305	0.00739057
1277	6430571L13Rik	ENSMUSG00000037977.6	10.5495	-2.26061	0.722839	-3.04733	0.00230884	0.0102325
1278	Arap2	ENSMUSG00000037999.13	1411.51	-2.87419	0.38665	-7.43902	1.01438e-13	6.97149e-12
1279	Phf2	ENSMUSG00000038025.7	6098.34	-1.25846	0.297179	-4.2351	2.28445e-05	0.000210667
1280	Socs1	ENSMUSG00000038037.4	818.898	-1.78349	0.26565	-6.71342	1.90116e-11	8.46317e-10
1281	Mturn	ENSMUSG00000038065.13	828.387	-1.52901	0.369961	-4.13403	3.56455e-05	0.000308115
1282	Stox2	ENSMUSG00000038143.16	122.298	-2.20767	0.400601	-5.50706	3.64867e-08	7.47558e-07
1283	Cd84	ENSMUSG00000038147.13	1285.75	-1.10611	0.360189	-3.07176	0.00212802	0.00958635
1284	Gstp2	ENSMUSG00000038155.10	7.67904	-2.00945	0.772316	-2.46024	0.0138843	0.043835
1285	Plekhg6	ENSMUSG00000038167.6	61.1154	-2.51278	0.717039	-3.53266	0.000411399	0.00244926
1286	Slc43a2	ENSMUSG00000038178.16	3154.65	-1.73363	0.449955	-3.85654	0.000115003	0.000832738
1287	Slamf7	ENSMUSG00000038179.13	289.053	-2.43917	0.613821	-4.01209	6.01825e-05	0.000482914
1288	Rilp	ENSMUSG00000038195.6	31.755	-1.80845	0.632957	-2.86155	0.00421575	0.0167289
1289	Pnmt	ENSMUSG00000038216.7	2.06836	-2.34011	0.953237	-2.5227	0.0116459	0.0380878
1290	Serpinf2	ENSMUSG00000038224.12	21.5338	-2.94962	0.786929	-3.66885	0.000243639	0.00157529
1291	Hoxa9	ENSMUSG00000038227.15	1.77715	-2.53272	0.969569	-2.50836	0.0121292	0.0392815
1292	F11r	ENSMUSG00000038235.4	425.865	-1.93113	0.360225	-5.36236	8.21398e-08	1.54298e-06
1293	Hoxa7	ENSMUSG00000038236.8	34.042	-3.88766	0.545671	-6.56756	5.11468e-11	2.06134e-09
1294	Aox4	ENSMUSG00000038242.12	12.5993	-3.43186	0.771076	-3.92531	8.66185e-05	0.000656324
1295	Slc22a23	ENSMUSG00000038267.14	240.765	-2.63157	0.396696	-6.62954	3.36737e-11	1.41842e-09
1296	Galnt18	ENSMUSG00000038296.14	169.37	-2.14556	0.289583	-7.40068	1.35493e-13	9.15139e-12
1297	Kcnh2	ENSMUSG00000038319.14	1129.82	-3.01728	0.488723	-6.1836	6.2657e-10	1.96048e-08
1298	Trpc4ap	ENSMUSG00000038324.13	6082.9	-1.02495	0.192129	-5.33475	9.56783e-08	1.75637e-06
1299	Arl5c	ENSMUSG00000038352.15	5614.68	-2.20651	0.32347	-6.82248	8.94825e-12	4.26446e-10
1300	Ankrd35	ENSMUSG00000038354.13	63.826	-2.6995	0.500256	-5.36416	8.13269e-08	1.53463e-06
1301	Camp	ENSMUSG00000038357.10	22.6518	-3.16013	0.904399	-3.64868	0.000263594	0.00168341
1302	Trp53inp2	ENSMUSG00000038375.15	1074.24	-2.29473	0.356669	-6.43523	1.23289e-10	4.55634e-09
1303	Rras	ENSMUSG00000038387.9	297.255	-1.35327	0.404128	-3.34953	0.00080948	0.00431601
1304	Gpr162	ENSMUSG00000038390.11	1298.27	-2.93169	0.389298	-7.53288	4.96317e-14	3.56094e-12
1305	Egr1	ENSMUSG00000038418.7	1573.42	-1.94952	0.594307	-3.28852	0.00100717	0.00515614
1306	Mfsd4b1	ENSMUSG00000038522.6	22.8183	-2.55776	0.56544	-4.3371	1.44374e-05	0.000142174
1307	Car14	ENSMUSG00000038526.14	32.5727	-3.63929	0.718081	-4.70611	2.5249e-06	3.15403e-05
1308	Rgs4	ENSMUSG00000038530.11	145.63	-1.55027	0.406172	-3.81854	0.000134246	0.000951674
1309	Tmc3	ENSMUSG00000038540.14	27.6236	-3.43608	0.605401	-5.04483	4.53935e-07	6.91387e-06
1310	Sp6	ENSMUSG00000038560.7	73.989	-2.38558	0.352186	-6.73968	1.58733e-11	7.21369e-10
1311	Sct	ENSMUSG00000038580.13	5.93844	-2.74462	0.915199	-3.2299	0.00123835	0.00613756
1312	Pptc7	ENSMUSG00000038582.15	1760.51	-1.12634	0.152808	-7.37097	1.69389e-13	1.12469e-11
1313	Ripor1	ENSMUSG00000038604.9	2177.19	-1.62754	0.288709	-5.63751	1.72527e-08	3.83991e-07
1314	Mcl1	ENSMUSG00000038612.16	7191.54	-1.01718	0.275048	-3.69838	0.000216978	0.00142855
1315	Lpar1	ENSMUSG00000038668.14	238.625	-2.88533	0.233671	-12.2957	9.55256e-35	5.84706e-32
1316	Pkhd1l1	ENSMUSG00000038725.12	338.699	-2.55673	0.73623	-3.5554	0.000377409	0.00228356
1317	Ephx1	ENSMUSG00000038776.13	627.417	-2.45375	0.342578	-7.16376	7.84966e-13	4.60333e-11
1318	Stap2	ENSMUSG00000038781.6	136.996	-1.91062	0.369565	-5.16842	2.36082e-07	3.90882e-06
1319	Ctnnal1	ENSMUSG00000038816.14	262.46	-1.06362	0.436858	-2.43621	0.0148421	0.0462476
1320	Itpkb	ENSMUSG00000038855.10	4050.97	-1.63045	0.240233	-6.78731	1.14246e-11	5.34064e-10
1321	Baiap2l1	ENSMUSG00000038859.7	57.4824	-2.51492	0.685422	-3.68064	0.000232645	0.00151438
1322	Zfhx3	ENSMUSG00000038872.9	109.855	-1.0639	0.383816	-2.77885	0.00545521	0.0207882
1323	Nipal2	ENSMUSG00000038879.7	39.1762	-1.49321	0.591757	-2.52726	0.0114957	0.0376825
1324	Plcl2	ENSMUSG00000038910.6	1048.1	-1.14588	0.298265	-3.84247	0.0001218	0.000874201
1325	Klk1b16	ENSMUSG00000038968.3	1.9409	-2.51439	0.956139	-2.61524	0.00891645	0.0307569
1326	Bmp6	ENSMUSG00000039004.5	25.9169	-2.10546	0.653344	-3.21715	0.00129473	0.00636383
1327	Arpin	ENSMUSG00000039043.5	132.314	-1.56807	0.467908	-3.35708	0.000787698	0.00421893
1328	Myo16	ENSMUSG00000039057.11	33.7973	-3.47909	0.526151	-6.2709	3.58969e-10	1.19873e-08
1329	Hrh3	ENSMUSG00000039059.11	35.1197	-4.81998	0.688522	-5.94522	2.76082e-09	7.46909e-08
1330	Echdc3	ENSMUSG00000039063.5	58.9123	-2.48109	0.638293	-3.89387	9.86573e-05	0.000732525
1331	F13a1	ENSMUSG00000039109.15	1509.07	-2.37874	0.367274	-6.47937	9.21043e-11	3.49621e-09
1332	Nrn1	ENSMUSG00000039114.15	30.4216	-2.54711	0.69124	-3.6705	0.000242078	0.00156695
1333	Gipc2	ENSMUSG00000039131.15	38.4654	-3.60158	0.603425	-5.68994	1.27084e-08	2.94579e-07
1334	Ifi44l	ENSMUSG00000039146.5	95.0817	-2.30067	0.962824	-2.8324	0.00461996	0.0180621
1335	Ube2h	ENSMUSG00000039159.16	1850.87	-1.18979	0.233809	-5.08882	3.60298e-07	5.64573e-06
1336	Tekt5	ENSMUSG00000039179.13	12.7749	-2.32565	0.682373	-3.31546	0.000914908	0.00477295
1337	1110008P14Rik	ENSMUSG00000039195.4	374.858	-1.31552	0.135309	-9.7212	2.44873e-22	5.57712e-20
1338	Orm1	ENSMUSG00000039196.2	67.7123	-3.28977	0.821406	-4.09781	4.17086e-05	0.000352435
1339	Rpl39l	ENSMUSG00000039209.12	9.17971	-2.70201	0.863699	-3.05774	0.00223011	0.00996375
1340	Stx11	ENSMUSG00000039232.12	298.97	-2.5973	0.544725	-4.78207	1.735e-06	2.27314e-05
1341	Sec24d	ENSMUSG00000039234.11	545.741	-1.06391	0.249105	-4.27206	1.93678e-05	0.000183353
1342	Isg20	ENSMUSG00000039236.18	878.377	-2.71971	0.396259	-6.86611	6.59746e-12	3.24684e-10
1343	Zfp750	ENSMUSG00000039238.6	36.7115	-2.52563	0.637272	-3.94848	7.86477e-05	0.000605294
1344	Vstm2b	ENSMUSG00000039257.11	2.20552	-2.13683	0.94256	-2.40639	0.016111	0.0493071
1345	Gimap3	ENSMUSG00000039264.9	1574.33	-4.39799	0.688229	-6.55611	5.52291e-11	2.19426e-09
1346	Clnk	ENSMUSG00000039315.15	19.6536	-3.37453	0.771761	-3.91686	8.9709e-05	0.0006753
1347	Uts2r	ENSMUSG00000039321.1	2.37057	-2.32193	0.93661	-2.59577	0.00943781	0.0321829
1348	Atp6v0e2	ENSMUSG00000039347.7	26.511	-2.03452	0.767841	-2.67943	0.00737469	0.0263543
1349	C130074G19Rik	ENSMUSG00000039349.5	187.751	-2.27349	0.568992	-4.00522	6.19585e-05	0.000494532
1350	Sectm1b	ENSMUSG00000039364.13	4.03404	-2.99059	0.872818	-3.50161	0.000462459	0.00270474
1351	Mreg	ENSMUSG00000039395.8	536.264	-5.12785	0.210984	-23.8592	8.13564e-126	7.96764e-122
1352	Ttc36	ENSMUSG00000039438.7	5.92141	-2.08606	0.772537	-2.56831	0.0102195	0.0342522
1353	Dcxr	ENSMUSG00000039450.11	204.634	-1.63616	0.320267	-5.10858	3.24597e-07	5.1648e-06
1354	Snx22	ENSMUSG00000039452.6	107.748	-2.17085	0.573263	-3.80119	0.000144005	0.00101098
1355	Ppl	ENSMUSG00000039457.3	231.519	-2.31178	0.727701	-3.21957	0.00128381	0.00631925
1356	Tspyl4	ENSMUSG00000039485.8	1099.22	-1.45869	0.310503	-4.69824	2.62418e-06	3.26141e-05
1357	Znfx1	ENSMUSG00000039501.14	1411.1	-1.05419	0.297709	-3.54173	0.000397516	0.00238069
1358	Cdsn	ENSMUSG00000039518.7	10.5453	-3.8456	0.897886	-4.29359	1.75808e-05	0.000168692
1359	Cyp7b1	ENSMUSG00000039519.6	38.9608	-2.14585	0.404182	-5.26822	1.37751e-07	2.43734e-06
1360	Foxp3	ENSMUSG00000039521.12	82.2251	-3.74826	0.747363	-4.9638	6.9128e-07	9.94864e-06
1361	Ajap1	ENSMUSG00000039546.9	16.093	-4.33953	0.812849	-5.06427	4.09978e-07	6.328e-06
1362	Rbms3	ENSMUSG00000039607.15	350.943	-1.88589	0.392157	-4.81186	1.49532e-06	1.99515e-05
1363	Tmem246	ENSMUSG00000039611.2	44.3765	-3.30465	0.578486	-5.5063	3.66459e-08	7.50034e-07
1364	Mocos	ENSMUSG00000039616.9	142.381	-2.6509	0.25905	-10.1856	2.29889e-24	6.62183e-22
1365	Hs3st6	ENSMUSG00000039628.8	43.7114	-3.36719	0.618191	-5.33075	9.78082e-08	1.79211e-06
1366	Capsl	ENSMUSG00000039676.3	13.6116	-1.59146	0.562938	-2.80926	0.00496553	0.0192137
1367	Tspan10	ENSMUSG00000039691.10	103.927	-2.1315	0.725644	-2.97329	0.00294627	0.01251
1368	Orai2	ENSMUSG00000039747.11	1232.82	-1.84475	0.440046	-4.19617	2.71463e-05	0.000244018
1369	Slc44a3	ENSMUSG00000039865.8	32.4927	-2.22954	0.611919	-3.63265	0.000280528	0.0017742
1370	Neurl2	ENSMUSG00000039873.4	119.164	-3.07899	0.444408	-6.89732	5.29923e-12	2.66828e-10
1371	Plcb4	ENSMUSG00000039943.16	305.271	-2.17186	0.285518	-7.6053	2.84233e-14	2.2005e-12
1372	Mrap	ENSMUSG00000039956.8	208.704	-3.48763	0.669562	-5.25594	1.47268e-07	2.58009e-06
1373	Bahd1	ENSMUSG00000040007.8	1079.51	-1.08144	0.181707	-5.95159	2.65558e-09	7.22427e-08
1374	Ptger3	ENSMUSG00000040016.16	177.159	-4.46062	0.649134	-6.82503	8.79095e-12	4.2203e-10
1375	Negr1	ENSMUSG00000040037.13	35.8341	-2.29991	0.894307	-2.77409	0.00553565	0.021013
1376	Tph1	ENSMUSG00000040046.14	11.8658	-2.83984	0.636815	-4.16356	3.13327e-05	0.000276199
1377	Gramd1b	ENSMUSG00000040111.16	833.047	-2.78852	0.398292	-7.00482	2.47301e-12	1.31986e-10
1378	Sdr9c7	ENSMUSG00000040127.13	4.85906	-3.1432	0.908924	-3.53339	0.00041026	0.00244322
1379	Rgl3	ENSMUSG00000040146.9	57.6998	-1.59165	0.503741	-3.16497	0.00155099	0.00738438
1380	Maob	ENSMUSG00000040147.14	116.325	-2.66245	0.896007	-3.33009	0.000868165	0.00456994
1381	Fmo2	ENSMUSG00000040170.13	147.107	-1.78946	0.5867	-3.07285	0.00212028	0.0095581
1382	Ccdc114	ENSMUSG00000040189.17	104.775	-2.13677	0.487328	-4.38287	1.17126e-05	0.000118991
1383	Cd209e	ENSMUSG00000040197.4	21.556	-2.91412	0.712754	-3.93797	8.21745e-05	0.000627995
1384	Tbc1d10c	ENSMUSG00000040247.5	5052.08	-1.30476	0.2807	-4.6484	3.34515e-06	4.05204e-05
1385	Bach2	ENSMUSG00000040270.16	667.456	-2.02015	0.456878	-4.43063	9.39597e-06	9.79451e-05
1386	Pacsin1	ENSMUSG00000040276.14	276.273	-3.31583	0.503089	-6.59278	4.31667e-11	1.77627e-09
1387	Ctsg	ENSMUSG00000040314.1	3.28902	-2.82183	0.872248	-3.31212	0.000925932	0.00482218
1388	Il7	ENSMUSG00000040329.14	243.062	-2.80049	0.758006	-3.7864	0.000152847	0.00105864
1389	Trim7	ENSMUSG00000040350.16	205.991	-2.13679	0.583357	-3.68602	0.000227784	0.00148671
1390	Timd2	ENSMUSG00000040413.15	8.33503	-2.74746	0.837522	-3.54134	0.000398098	0.00238312
1391	Dgkz	ENSMUSG00000040479.11	13830.3	-1.24914	0.375234	-3.32961	0.000869674	0.00457665
1392	March9	ENSMUSG00000040502.5	86.7158	-1.40378	0.443073	-3.16919	0.00152863	0.00730812
1393	Pvr	ENSMUSG00000040511.14	1158.43	-1.61842	0.345583	-4.68348	2.82042e-06	3.48759e-05
1394	Pitpnm3	ENSMUSG00000040543.16	10.2997	-1.67007	0.667925	-2.47513	0.0133188	0.0423982
1395	Gstm2	ENSMUSG00000040562.12	84.8634	-1.99817	0.562317	-3.56118	0.000369194	0.0022423
1396	Apoc1	ENSMUSG00000040564.14	235.178	-1.98796	0.595134	-3.35739	0.000786826	0.00421542
1397	Tmem51	ENSMUSG00000040616.3	154.595	-1.23655	0.354846	-3.48784	0.000486932	0.0028251
1398	Rimklb	ENSMUSG00000040649.15	32.1639	-2.97506	0.749837	-3.93978	8.15561e-05	0.000624488
1399	Ppp1r14c	ENSMUSG00000040653.6	23.1108	-2.36433	0.866017	-2.83031	0.00465031	0.0181771
1400	Clcf1	ENSMUSG00000040663.8	258.813	-2.55898	0.619274	-4.15987	3.18425e-05	0.000280084
1401	Kremen2	ENSMUSG00000040680.8	12.8331	-3.98393	0.747683	-4.98167	6.30381e-07	9.22816e-06
1402	Slco4c1	ENSMUSG00000040693.7	2.84996	-2.35082	0.930248	-2.68471	0.00725921	0.0260319
1403	Cyp2s1	ENSMUSG00000040703.11	71.3182	-2.1085	0.709156	-3.01375	0.00258039	0.0112216
1404	A930016O22Rik	ENSMUSG00000040705.2	8.82888	-1.50441	0.578969	-2.55848	0.0105132	0.0350684
1405	Kcna2	ENSMUSG00000040724.5	546.268	-1.9011	0.596795	-3.20388	0.00135587	0.00662279
1406	Esrp1	ENSMUSG00000040728.15	138.452	-2.32206	0.711801	-3.29305	0.000991085	0.00508844
1407	Cep126	ENSMUSG00000040729.7	54.5816	-2.68861	0.56814	-4.70474	2.54196e-06	3.17129e-05
1408	Rnf167	ENSMUSG00000040746.15	2951.05	-1.66293	0.210197	-7.91136	2.54597e-15	2.36341e-13
1409	Cd53	ENSMUSG00000040747.9	2088.05	-1.64656	0.533079	-3.1006	0.00193131	0.00886125
1410	S100g	ENSMUSG00000040808.4	5.95286	-3.47629	0.833024	-4.11698	3.83867e-05	0.00032776
1411	Chil3	ENSMUSG00000040809.10	28.0089	-2.15648	0.68086	-3.17325	0.00150743	0.0072279
1412	Zmynd15	ENSMUSG00000040829.14	211.814	-1.81273	0.463498	-3.91471	9.05121e-05	0.000680299
1413	Osbpl10	ENSMUSG00000040875.12	184.219	-3.32649	0.491272	-6.75443	1.43402e-11	6.56267e-10
1414	Ccr6	ENSMUSG00000040899.13	94.9772	-3.01291	0.80047	-3.90612	9.37913e-05	0.000702251
1415	Mgl2	ENSMUSG00000040950.13	82.098	-2.36898	0.794635	-3.0596	0.00221631	0.00991943
1416	Asgr2	ENSMUSG00000040963.15	9.76314	-3.09782	0.806378	-3.52653	0.000421047	0.00249835
1417	Igsf21	ENSMUSG00000040972.8	20.5653	-3.91449	0.611314	-5.31263	1.08053e-07	1.95784e-06
1418	Grid1	ENSMUSG00000041078.6	4.01656	-3.05566	0.881133	-3.52155	0.000429024	0.00254029
1419	Ccdc8	ENSMUSG00000041117.8	113.265	-1.78146	0.636124	-2.82939	0.00466373	0.0182223
1420	N4bp2l1	ENSMUSG00000041132.11	554.306	-1.58496	0.351874	-4.50577	6.61336e-06	7.27321e-05
1421	Prkd2	ENSMUSG00000041187.16	3869.23	-1.44159	0.142676	-10.1039	5.30693e-24	1.44371e-21
1422	Pla2g2d	ENSMUSG00000041202.12	711.822	-3.18879	0.61517	-5.24075	1.59926e-07	2.76383e-06
1423	Pklr	ENSMUSG00000041237.12	3.34084	-2.58806	0.922312	-2.9464	0.00321502	0.0134356
1424	Uspl1	ENSMUSG00000041264.16	2540.64	-1.12677	0.196088	-5.74629	9.12218e-09	2.17632e-07
1425	Nkx6-2	ENSMUSG00000041309.17	38.3385	-5.16248	0.779503	-5.47334	4.4164e-08	8.86311e-07
1426	NA	ENSMUSG00000041449.16	60.5621	-2.34226	0.556451	-4.20343	2.62896e-05	0.000237079
1427	NA	ENSMUSG00000041481.16	661.294	-2.97599	0.675187	-4.49218	7.04984e-06	7.67567e-05
1428	Hspb8	ENSMUSG00000041548.4	587.365	-3.09816	0.607507	-5.13178	2.87016e-07	4.66152e-06
1429	Serpina12	ENSMUSG00000041567.3	2.82769	-2.42456	0.9301	-2.74859	0.00598515	0.0223526
1430	Bicdl1	ENSMUSG00000041609.16	1143.19	-1.89256	0.605138	-3.13696	0.00170709	0.00800496
1431	Gucy1a2	ENSMUSG00000041624.10	37.5741	-3.03214	0.599001	-4.93224	8.12939e-07	1.15888e-05
1432	Kctd12b	ENSMUSG00000041633.14	114.713	-1.0611	0.332129	-3.19799	0.00138388	0.00673107
1433	Kif21b	ENSMUSG00000041642.18	8474.49	-1.01527	0.196387	-5.16981	2.34326e-07	3.88303e-06
1434	Bbox1	ENSMUSG00000041660.8	7.71406	-3.53312	0.840074	-4.18681	2.82898e-05	0.000253251
1435	Iapp	ENSMUSG00000041681.2	6.64763	-3.56334	0.78211	-3.89353	9.87946e-05	0.000732989
1436	Trpc5	ENSMUSG00000041710.4	2.24477	-2.39955	0.925501	-2.68837	0.00718025	0.0257818
1437	Pgm5	ENSMUSG00000041731.13	251.889	-4.03898	0.615622	-6.56666	5.14555e-11	2.06953e-09
1438	Tmem45b	ENSMUSG00000041737.8	416.861	-2.96087	0.905924	-3.96359	7.38314e-05	0.000573408
1439	Gpr155	ENSMUSG00000041762.16	106.736	-1.05646	0.409878	-2.58312	0.00979102	0.0331335
1440	Slc24a4	ENSMUSG00000041771.13	32.8531	-2.30267	0.864447	-2.76852	0.00563108	0.0212893
1441	Lad1	ENSMUSG00000041782.14	267.87	-2.57156	0.81877	-3.24443	0.00117684	0.00588482
1442	Myrip	ENSMUSG00000041794.13	16.4095	-2.16085	0.710413	-2.99247	0.00276731	0.011877
1443	Phlda3	ENSMUSG00000041801.5	500.613	-1.13925	0.333684	-3.4142	0.000639692	0.00356665
1444	Oosp1	ENSMUSG00000041857.10	13.9924	-1.69128	0.963882	-2.45384	0.0141339	0.0444081
1445	Dlx1	ENSMUSG00000041911.3	11.9574	-2.44054	0.818407	-2.82907	0.00466834	0.0182367
1446	Nol4	ENSMUSG00000041923.15	12.7563	-1.99714	0.792793	-2.52539	0.0115569	0.0378538
1447	Fam222a	ENSMUSG00000041930.7	210.98	-1.12537	0.378033	-2.97647	0.00291588	0.0124025
1448	S100a10	ENSMUSG00000041959.14	1704.59	-2.54254	0.281829	-9.02199	1.84705e-19	3.04018e-17
1449	Rptn	ENSMUSG00000041984.2	54.0498	-4.8639	0.793928	-5.33566	9.51964e-08	1.75081e-06
1450	Hrnr	ENSMUSG00000041991.18	4.66087	-3.08561	0.888376	-3.5499	0.000385374	0.00232256
1451	2010003K11Rik	ENSMUSG00000042041.6	13.5658	-2.69541	0.92059	-3.07393	0.00211258	0.00952997
1452	Arsb	ENSMUSG00000042082.6	338.389	-1.08906	0.429984	-2.53588	0.0112166	0.0369366
1453	Kdm5b	ENSMUSG00000042207.17	1835.74	-1.01023	0.225473	-4.48059	7.44359e-06	8.0285e-05
1454	Pglyrp4	ENSMUSG00000042250.13	2.49239	-2.67823	0.941519	-2.87557	0.00403297	0.0161542
1455	Pm20d1	ENSMUSG00000042251.12	42.9454	-4.20805	0.738384	-5.11195	3.18856e-07	5.10248e-06
1456	Isl1	ENSMUSG00000042258.13	101.982	-2.13853	0.803943	-2.73507	0.00623677	0.0230969
1457	Ccr8	ENSMUSG00000042262.5	39.989	-4.45528	0.565083	-6.65907	2.75569e-11	1.19415e-09
1458	Slc26a9	ENSMUSG00000042268.10	5.34917	-2.22724	0.869464	-2.45252	0.0141858	0.0445428
1459	H1foo	ENSMUSG00000042279.13	3.15833	-2.29002	0.962666	-2.56836	0.0102181	0.0342522
1460	S100a14	ENSMUSG00000042306.11	182.468	-2.17047	0.853278	-2.60566	0.00916978	0.0314241
1461	Osbpl6	ENSMUSG00000042359.18	110.403	-1.74659	0.698178	-2.5185	0.0117857	0.0384167
1462	Dmrt3	ENSMUSG00000042372.4	33.218	-4.02163	0.790795	-4.51689	6.27547e-06	6.96812e-05
1463	Dlgap3	ENSMUSG00000042388.14	23.143	-3.19387	0.546573	-5.4786	4.2871e-08	8.63016e-07
1464	Crtac1	ENSMUSG00000042401.6	8.24488	-3.99742	0.75115	-4.35109	1.3546e-05	0.000134752
1465	Mgat3	ENSMUSG00000042428.6	607.342	-4.06035	0.548024	-7.43218	1.06824e-13	7.29047e-12
1466	Adora1	ENSMUSG00000042429.8	134.818	-2.8844	0.895859	-3.46897	0.000522463	0.00300014
1467	Abcb4	ENSMUSG00000042476.12	53.4699	-1.66969	0.416979	-4.00185	6.28486e-05	0.000500209
1468	Ago4	ENSMUSG00000042500.11	84.3532	-1.23951	0.480172	-2.5905	0.00958368	0.0325725
1469	Golga7b	ENSMUSG00000042532.14	8.42863	-2.88178	0.754315	-3.34012	0.000837408	0.00443666
1470	Maff	ENSMUSG00000042622.13	165.651	-1.23795	0.388137	-3.18957	0.00142483	0.00689364
1471	Gucy2c	ENSMUSG00000042638.14	7.88204	-2.10028	0.775406	-2.63526	0.00840735	0.0292391
1472	Rgsl1	ENSMUSG00000042641.18	11.8221	-2.63987	0.728233	-3.44001	0.000581691	0.00329422
1473	Dusp15	ENSMUSG00000042662.16	38.4926	-4.10148	0.763252	-4.87512	1.08744e-06	1.51062e-05
1474	Ypel3	ENSMUSG00000042675.15	1668.39	-1.34148	0.377044	-3.55881	0.000372538	0.00225841
1475	Jph1	ENSMUSG00000042686.5	53.7751	-3.46306	0.716909	-4.78751	1.68864e-06	2.21536e-05
1476	Nmnat2	ENSMUSG00000042751.14	12.2413	-2.69708	0.710545	-3.4802	0.000501046	0.00289413
1477	Apobr	ENSMUSG00000042759.12	156.905	-1.47207	0.521941	-2.82709	0.00469735	0.0183315
1478	Flt3	ENSMUSG00000042817.15	200.115	-2.26851	0.664645	-3.4548	0.000550697	0.00314289
1479	Lrrtm3	ENSMUSG00000042846.8	5.3773	-2.61145	0.888043	-3.1936	0.0014051	0.00681906
1480	Egflam	ENSMUSG00000042961.13	73.4967	-2.01793	0.298736	-6.73374	1.65354e-11	7.47989e-10
1481	Notum	ENSMUSG00000042988.10	4.27197	-3.1888	0.901971	-3.56066	0.000369918	0.0022453
1482	Rasef	ENSMUSG00000043003.13	121.37	-4.55757	0.762326	-5.83965	5.23098e-09	1.34109e-07
1483	Ptgir	ENSMUSG00000043017.9	68.982	-1.66541	0.468613	-3.55364	0.000379943	0.00229548
1484	Trpv3	ENSMUSG00000043029.2	14.0031	-2.97986	0.728365	-3.89418	9.85308e-05	0.000731863
1485	Tnp2	ENSMUSG00000043050.7	2.69096	-2.23716	0.938783	-2.55772	0.0105362	0.0351271
1486	Fam89a	ENSMUSG00000043068.6	26.0385	-2.67567	0.524906	-4.96704	6.79834e-07	9.81275e-06
1487	Il17re	ENSMUSG00000043088.16	85.01	-2.41889	0.541095	-4.46844	7.87934e-06	8.4105e-05
1488	Hic1	ENSMUSG00000043099.4	115.393	-1.74018	0.362893	-4.79454	1.63052e-06	2.14919e-05
1489	Qrfp	ENSMUSG00000043102.2	11.0721	-2.56414	0.814777	-2.95764	0.00310002	0.0130384
1490	A530016L24Rik	ENSMUSG00000043122.6	126.323	-3.41362	0.910607	-4.26065	2.03835e-05	0.000191121
1491	NA	ENSMUSG00000043145.6	2.53185	-2.56317	0.954113	-2.74362	0.0060765	0.0226189
1492	Lor	ENSMUSG00000043165.7	2.73182	-2.53423	0.951597	-2.75583	0.00585426	0.0219763
1493	Fam124b	ENSMUSG00000043230.2	16.4153	-1.95405	0.688168	-2.81283	0.00491073	0.019028
1494	Fam13c	ENSMUSG00000043259.15	25.0665	-1.30007	0.515883	-2.51878	0.0117762	0.0384049
1495	Ifi209	ENSMUSG00000043263.13	798.429	-4.07463	0.444211	-9.16411	4.99583e-20	8.7369e-18
1496	Trim56	ENSMUSG00000043279.9	3893.34	-1.02623	0.190307	-5.39272	6.93975e-08	1.33133e-06
1497	Mei4	ENSMUSG00000043289.12	57.9931	-1.59642	0.552456	-2.89453	0.00379725	0.0153639
1498	Rhbdl2	ENSMUSG00000043333.12	42.0904	-2.97096	0.629019	-4.67097	2.99774e-06	3.68824e-05
1499	Otud1	ENSMUSG00000043415.5	337.661	-1.95519	0.412882	-4.73616	2.17809e-06	2.78656e-05
1500	Psapl1	ENSMUSG00000043430.5	16.1206	-3.60234	0.794466	-4.15664	3.22965e-05	0.000283166
1501	Sptssb	ENSMUSG00000043461.13	50.5458	-2.27431	0.84177	-2.73128	0.00630889	0.0232825
1502	NA	ENSMUSG00000043488.5	38.0954	-2.4577	0.430703	-5.64977	1.60665e-08	3.61717e-07
1503	Lgals2	ENSMUSG00000043501.4	2.62375	-3.03066	0.900061	-3.31342	0.000921616	0.00480226
1504	Rai2	ENSMUSG00000043518.7	31.6754	-2.90313	0.64935	-4.30717	1.65355e-05	0.000159783
1505	Mdga1	ENSMUSG00000043557.15	180.517	-1.92109	0.649979	-2.97294	0.00294966	0.0125217
1506	1700019D03Rik	ENSMUSG00000043629.12	92.206	-3.49012	0.621051	-5.5759	2.46256e-08	5.27144e-07
1507	Adamts3	ENSMUSG00000043635.12	23.8474	-2.37939	0.504365	-4.63043	3.6491e-06	4.35488e-05
1508	Rbm20	ENSMUSG00000043639.14	144.544	-2.81349	0.715439	-4.00074	6.31436e-05	0.000502353
1509	Npsr1	ENSMUSG00000043659.11	10.3361	-3.28774	0.699489	-4.15282	3.2841e-05	0.000287553
1510	Tmem221	ENSMUSG00000043664.7	185.589	-2.47238	0.514796	-4.80465	1.5502e-06	2.05578e-05
1511	Tox3	ENSMUSG00000043668.13	50.985	-5.46626	0.643576	-6.12269	9.20103e-10	2.78118e-08
1512	Kcns3	ENSMUSG00000043673.11	26.9967	-1.8929	0.569641	-3.31543	0.000915016	0.00477295
1513	Fam25c	ENSMUSG00000043681.5	6.1378	-3.92431	0.840456	-4.4453	8.77677e-06	9.23754e-05
1514	Capn13	ENSMUSG00000043705.6	4.24122	-2.01902	0.937346	-2.49185	0.0127078	0.0407912
1515	Col6a6	ENSMUSG00000043719.14	48.2362	-1.94486	0.665647	-2.94097	0.00327186	0.013624
1516	Krt13	ENSMUSG00000044041.4	3.84856	-2.98991	0.90036	-3.38972	0.000699648	0.00383329
1517	Ccr10	ENSMUSG00000044052.3	15.7977	-4.17458	0.820089	-4.8916	1.00021e-06	1.39837e-05
1518	Fam19a2	ENSMUSG00000044071.8	7.29013	-3.48451	0.819916	-4.2089	2.56612e-05	0.000232697
1519	S100a1	ENSMUSG00000044080.9	494.148	-2.11983	0.470502	-4.51214	6.4177e-06	7.09588e-05
1520	Lmod3	ENSMUSG00000044086.8	13.2714	-2.49582	0.846495	-2.83861	0.00453099	0.0177462
1521	Hepacam2	ENSMUSG00000044156.14	48.6868	-2.31915	0.627618	-3.70388	0.000212328	0.00140692
1522	Tnip3	ENSMUSG00000044162.12	22.7723	-2.47545	0.560401	-4.31869	1.5696e-05	0.000153042
1523	Ptx4	ENSMUSG00000044172.6	13.2853	-2.50643	0.838036	-2.88646	0.00389606	0.0156864
1524	Wfikkn2	ENSMUSG00000044177.4	694.332	-3.33813	0.611374	-5.50393	3.7141e-08	7.57004e-07
1525	Gpr146	ENSMUSG00000044197.8	573.459	-1.83171	0.423083	-4.33458	1.46037e-05	0.000143668
1526	S1pr4	ENSMUSG00000044199.6	386.087	-2.96756	0.548908	-5.42336	5.84901e-08	1.14527e-06
1527	Aqp5	ENSMUSG00000044217.16	27.516	-2.14168	0.843074	-2.54259	0.0110034	0.0363324
1528	Pcsk9	ENSMUSG00000044254.6	7.8985	-3.07222	0.753749	-3.65912	0.000253088	0.00162426
1529	Krt84	ENSMUSG00000044294.7	6.20614	-2.78695	0.873295	-3.05226	0.00227124	0.0100969
1530	Apol7c	ENSMUSG00000044309.7	138.483	-3.52537	0.670461	-5.24627	1.55206e-07	2.69029e-06
1531	Mab21l3	ENSMUSG00000044313.13	49.9042	-3.27185	0.596831	-5.33882	9.35541e-08	1.73199e-06
1532	Ackr3	ENSMUSG00000044337.5	119.749	-1.88783	0.79657	-2.41667	0.015663	0.0482528
1533	Snhg11	ENSMUSG00000044349.15	644.343	-5.83694	0.661866	-8.81135	1.23649e-18	1.80739e-16
1534	Lacc1	ENSMUSG00000044350.14	186.185	-1.18904	0.439609	-2.70682	0.00679315	0.024654
1535	Tmem74b	ENSMUSG00000044364.5	4.48882	-2.03636	0.839349	-2.44779	0.0143735	0.0450083
1536	Adig	ENSMUSG00000044405.4	151.115	-2.34013	0.951735	-3.07021	0.00213911	0.00962304
1537	Shisa2	ENSMUSG00000044461.5	605.114	-4.28855	0.73673	-5.98553	2.15686e-09	5.9924e-08
1538	Klk1b11	ENSMUSG00000044485.4	2.95995	-3.23147	0.921566	-3.40056	0.000672473	0.00371139
1539	Lingo4	ENSMUSG00000044505.5	121.591	-2.10293	0.416942	-5.03787	4.70742e-07	7.13102e-06
1540	Serpinb3a	ENSMUSG00000044594.14	56.0914	-4.95336	0.831896	-5.76536	8.14843e-09	1.98019e-07
1541	Pard6b	ENSMUSG00000044641.7	88.0576	-1.49114	0.39243	-3.79992	0.000144742	0.00101506
1542	Zbtb7c	ENSMUSG00000044646.14	48.7688	-1.37639	0.482217	-2.85842	0.00425759	0.0168676
1543	Csrnp3	ENSMUSG00000044647.16	4.22105	-2.23242	0.925716	-2.46695	0.0136268	0.043203
1544	Il27	ENSMUSG00000044701.5	10.2463	-2.68058	0.797922	-3.19783	0.00138465	0.00673314
1545	Klk14	ENSMUSG00000044737.6	3.82423	-2.80881	0.851822	-3.03005	0.00244512	0.0107286
1546	Zfp36	ENSMUSG00000044786.6	2049.07	-2.32786	0.353781	-6.58245	4.62755e-11	1.89623e-09
1547	NA	ENSMUSG00000044867.5	267.276	-1.75214	0.619329	-2.84196	0.00448375	0.0175893
1548	Kctd21	ENSMUSG00000044952.5	119.552	-1.2582	0.276978	-4.54352	5.53228e-06	6.27451e-05
1549	Tst	ENSMUSG00000044986.8	368.91	-1.66272	0.610313	-2.73443	0.00624875	0.0231188
1550	Prkce	ENSMUSG00000045038.14	184.793	-1.37396	0.479135	-2.87561	0.00403251	0.0161542
1551	Zc2hc1c	ENSMUSG00000045064.4	11.6765	-2.11143	0.75821	-2.72035	0.0065213	0.0238891
1552	Arhgef37	ENSMUSG00000045094.7	52.1934	-3.59671	0.568986	-6.12061	9.32167e-10	2.8112e-08
1553	AI467606	ENSMUSG00000045165.6	2941.78	-1.16961	0.241671	-4.83988	1.29915e-06	1.76222e-05
1554	Lrrc3b	ENSMUSG00000045201.5	43.5794	-3.29261	0.664559	-4.87934	1.06441e-06	1.48284e-05
1555	Asxl3	ENSMUSG00000045215.16	10.2913	-3.2015	0.758161	-3.72306	0.000196826	0.00132029
1556	Hs6st1	ENSMUSG00000045216.7	2103.88	-1.1686	0.258998	-4.51208	6.41951e-06	7.09588e-05
1557	NA	ENSMUSG00000045231.4	27.479	-3.73125	0.7145	-4.37542	1.212e-05	0.000122621
1558	Rln3	ENSMUSG00000045232.4	6.46718	-2.78227	0.86524	-3.42715	0.000609949	0.00342519
1559	Dcaf12l1	ENSMUSG00000045284.9	20.9507	-3.39425	0.576715	-5.33587	9.50887e-08	1.75047e-06
1560	Rtn4rl1	ENSMUSG00000045287.6	222.436	-2.90623	0.327832	-8.84292	9.32531e-19	1.38375e-16
1561	Sowahb	ENSMUSG00000045314.5	29.2005	-2.68423	0.837274	-3.27	0.00107549	0.00544049
1562	Proser2	ENSMUSG00000045319.13	48.6146	-2.54961	0.633899	-4.01926	5.83819e-05	0.000471169
1563	Nyap1	ENSMUSG00000045348.16	1022.09	-2.11277	0.651449	-3.25712	0.0011255	0.00566422
1564	Hcar2	ENSMUSG00000045502.6	34.4792	-2.32923	0.76753	-3.08143	0.0020601	0.00932328
1565	Mc2r	ENSMUSG00000045569.6	7.81812	-2.83136	0.869597	-3.04294	0.00234279	0.0103585
1566	Penk	ENSMUSG00000045573.9	90.554	-5.48957	0.532411	-8.31715	9.01055e-17	1.00278e-14
1567	Olig3	ENSMUSG00000045591.6	66.7398	-2.91748	0.538356	-5.34834	8.87655e-08	1.65114e-06
1568	Sh3tc2	ENSMUSG00000045629.7	126.202	-3.6116	0.412637	-8.64538	5.36267e-18	7.24404e-16
1569	Henmt1	ENSMUSG00000045662.16	8.59571	-1.97743	0.697024	-2.768	0.00564018	0.0213189
1570	Cdc42ep2	ENSMUSG00000045664.4	117.608	-1.76369	0.38329	-4.6015	4.19451e-06	4.92258e-05
1571	Nlrp4e	ENSMUSG00000045693.8	11.0646	-3.57758	0.894957	-4.12835	3.65384e-05	0.000314852
1572	Slc16a5	ENSMUSG00000045775.15	2689.12	-1.51875	0.401798	-3.78134	0.000155986	0.00107733
1573	Slitrk6	ENSMUSG00000045871.4	7.69849	-2.65573	0.8384	-2.90518	0.00367046	0.014988
1574	Adra1a	ENSMUSG00000045875.12	83.6094	-2.38311	0.693954	-3.47299	0.000514694	0.00295987
1575	4933440M02Rik	ENSMUSG00000045928.2	6.53912	-3.21082	0.856589	-3.8325	0.000126847	0.000904128
1576	Cavin2	ENSMUSG00000045954.7	532.054	-1.85211	0.772031	-2.46136	0.013841	0.0437404
1577	Igfals	ENSMUSG00000046070.8	12.7033	-1.72732	0.675532	-2.53697	0.0111818	0.0368468
1578	Clec9a	ENSMUSG00000046080.17	127.28	-1.84941	0.755396	-2.50225	0.0123408	0.0398351
1579	Mcmdc2	ENSMUSG00000046101.16	4.32064	-2.29331	0.857486	-2.6072	0.0091285	0.0313299
1580	Tmem229b	ENSMUSG00000046157.13	1320.23	-1.62893	0.172271	-9.45599	3.19973e-21	6.73905e-19
1581	Olig1	ENSMUSG00000046160.6	9.12552	-2.70554	0.921893	-3.30746	0.000941476	0.00488366
1582	Adamts6	ENSMUSG00000046169.9	248.562	-2.44854	0.33862	-7.22509	5.00777e-13	3.01807e-11
1583	Tusc5	ENSMUSG00000046275.2	397.891	-3.09864	0.820323	-3.9154	9.02551e-05	0.000678629
1584	AI464131	ENSMUSG00000046312.4	67.4965	-1.87653	0.604753	-3.11493	0.0018399	0.00852571
1585	Stxbp6	ENSMUSG00000046314.16	80.356	-4.20953	0.443551	-8.88086	6.63425e-19	1.02319e-16
1586	BC107364	ENSMUSG00000046317.14	5.02367	-2.764	0.830476	-3.08174	0.00205795	0.00931787
1587	Gpat2	ENSMUSG00000046338.4	34.0464	-1.79933	0.702554	-2.58409	0.0097637	0.0330639
1588	1700067K01Rik	ENSMUSG00000046408.13	24.0786	-2.35516	0.411389	-5.63333	1.76766e-08	3.90782e-07
1589	Sh2d7	ENSMUSG00000046460.14	6.71838	-3.33072	0.901325	-3.78784	0.000151963	0.001054
1590	Kctd4	ENSMUSG00000046523.4	50.2396	-2.61097	0.757181	-3.49429	0.00047533	0.00276845
1591	Ar	ENSMUSG00000046532.8	186.422	-3.54245	0.372829	-9.39825	5.54757e-21	1.10878e-18
1592	Mapk10	ENSMUSG00000046709.16	33.5307	-2.47241	0.821774	-3.09076	0.00199648	0.00908328
1593	Bst2	ENSMUSG00000046718.8	1284.22	-1.43241	0.405107	-3.5381	0.000403021	0.0024067
1594	Kctd11	ENSMUSG00000046731.4	193.355	-1.01995	0.357644	-2.85117	0.00435588	0.0171795
1595	Fam83h	ENSMUSG00000046761.12	197.711	-1.2648	0.490168	-2.58151	0.0098368	0.0332382
1596	A530053G22Rik	ENSMUSG00000046764.8	21.9494	-2.42386	0.952714	-2.85249	0.0043378	0.017123
1597	Ppp1r3b	ENSMUSG00000046794.9	1237.92	-1.66793	0.274245	-6.08243	1.18376e-09	3.49191e-08
1598	Lrrc75b	ENSMUSG00000046807.10	63.8495	-4.11001	0.56157	-6.87718	6.10502e-12	3.04272e-10
1599	Gchfr	ENSMUSG00000046814.3	19.435	-4.11896	0.672944	-4.80793	1.52505e-06	2.0286e-05
1600	Krt1	ENSMUSG00000046834.6	9.83413	-2.33449	0.916145	-2.54734	0.0108548	0.0359385
1601	Ltb4r1	ENSMUSG00000046908.5	27.2166	-2.11845	0.56465	-3.72648	0.000194172	0.00130561
1602	NA	ENSMUSG00000046952.8	60.9501	-1.45924	0.983679	-3.33569	0.000850894	0.00449716
1603	Pla2g4f	ENSMUSG00000046971.7	27.3599	-2.36351	0.687059	-3.42387	0.000617361	0.0034569
1604	Wdr27	ENSMUSG00000046991.9	48.0148	-2.82801	0.526122	-5.31091	1.09082e-07	1.97467e-06
1605	Samd14	ENSMUSG00000047181.12	175.683	-3.30168	0.257683	-12.7207	4.53969e-37	3.29329e-34
1606	Irs3	ENSMUSG00000047182.6	31.5452	-3.14694	0.889736	-3.57155	0.000354878	0.00217218
1607	Rnase2a	ENSMUSG00000047222.6	5.45671	-2.57595	0.933678	-3.03863	0.00237657	0.0104818
1608	Gm527	ENSMUSG00000047227.4	42.4818	-1.06142	0.418188	-2.53932	0.0111067	0.0366118
1609	Cldn2	ENSMUSG00000047230.6	5.35156	-2.40011	0.871183	-3.049	0.00229606	0.0101887
1610	Gpr15	ENSMUSG00000047293.6	5.82154	-2.36191	0.881511	-2.98217	0.00286216	0.0122164
1611	Kcne4	ENSMUSG00000047330.8	25.9933	-1.38735	0.520154	-2.67287	0.00752044	0.0267434
1612	Gpr68	ENSMUSG00000047415.11	239.977	-3.74583	0.629256	-5.97911	2.24358e-09	6.21571e-08
1613	Fam180a	ENSMUSG00000047420.8	5.76673	-2.08085	0.902139	-2.41578	0.0157016	0.0483337
1614	Dlk2	ENSMUSG00000047428.14	37.2824	-2.53873	0.774357	-3.2957	0.000981763	0.00505703
1615	NA	ENSMUSG00000047462.8	65.4076	-2.95267	0.578994	-5.06234	4.14148e-07	6.38232e-06
1616	Baiap3	ENSMUSG00000047507.12	25.0243	-1.45692	0.463412	-3.1332	0.00172912	0.00808697
1617	Als2cr12	ENSMUSG00000047528.13	16.5358	-2.03384	0.718952	-2.82543	0.00472167	0.0183973
1618	Mafa	ENSMUSG00000047591.4	15.3472	-3.70848	0.698453	-4.64784	3.35432e-06	4.0588e-05
1619	Nr1h4	ENSMUSG00000047638.15	8.08116	-2.71076	0.843504	-3.08713	0.00202099	0.00917173
1620	Gal3st3	ENSMUSG00000047658.6	13.8726	-3.39445	0.822483	-3.73354	0.00018881	0.00127525
1621	Ust	ENSMUSG00000047712.8	115.986	-2.85282	0.280681	-10.091	6.05211e-24	1.62387e-21
1622	Fcgbp	ENSMUSG00000047730.17	1914.59	-5.4308	0.712532	-7.8453	4.31928e-15	3.8631e-13
1623	Samd9l	ENSMUSG00000047735.14	1754.81	-1.69195	0.640776	-2.66393	0.00772327	0.0273258
1624	Utf1	ENSMUSG00000047751.9	12.0425	-4.07387	0.804209	-4.8332	1.34355e-06	1.80991e-05
1625	Hs3st3a1	ENSMUSG00000047759.6	23.5559	-1.39418	0.493608	-2.8266	0.00470457	0.0183453
1626	Atg16l2	ENSMUSG00000047767.17	774.196	-1.05917	0.208761	-5.07364	3.90283e-07	6.04784e-06
1627	Angptl8	ENSMUSG00000047822.8	25.3367	-2.58753	0.925029	-3.01657	0.00255651	0.0111375
1628	Diras2	ENSMUSG00000047842.6	463.336	-4.17118	0.556217	-7.50801	6.0034e-14	4.22981e-12
1629	Gimap6	ENSMUSG00000047867.11	3816.28	-1.89417	0.456333	-4.15649	3.23171e-05	0.000283219
1630	Ccr4	ENSMUSG00000047898.7	481.897	-2.27895	0.729864	-3.17466	0.00150011	0.00720164
1631	Gp5	ENSMUSG00000047953.6	6.61377	-2.59317	0.723652	-3.36035	0.000778443	0.00418194
1632	Kcna1	ENSMUSG00000047976.4	5.64034	-2.0116	0.905187	-2.61319	0.00897013	0.0309001
1633	Tmem229a	ENSMUSG00000048022.11	5.12429	-2.29407	0.879007	-2.58943	0.00961337	0.0326621
1634	Tenm4	ENSMUSG00000048078.16	163.485	-4.20942	0.429841	-9.58687	9.07994e-22	1.9983e-19
1635	Dmrt2	ENSMUSG00000048138.9	249.122	-3.51345	0.738258	-4.86874	1.12311e-06	1.55246e-05
1636	Nat8l	ENSMUSG00000048142.9	264.251	-1.70273	0.706125	-2.42598	0.0152669	0.0473153
1637	Bend7	ENSMUSG00000048186.14	23.7793	-2.20891	0.610725	-3.58267	0.000340107	0.00209026
1638	Crebrf	ENSMUSG00000048249.14	1410.78	-1.14822	0.301946	-3.80353	0.000142649	0.00100326
1639	Gli2	ENSMUSG00000048402.14	44.629	-2.13526	0.442577	-4.8002	1.58504e-06	2.09771e-05
1640	Cxcr6	ENSMUSG00000048521.8	173.904	-2.75397	0.696926	-4.00277	6.26043e-05	0.000498671
1641	Tob2	ENSMUSG00000048546.7	1790.55	-1.52336	0.291921	-5.21865	1.80231e-07	3.06333e-06
1642	Skint10	ENSMUSG00000048766.6	106.178	-5.75185	0.795847	-6.61654	3.67715e-11	1.53243e-09
1643	Gm12185	ENSMUSG00000048852.13	211.367	-2.11365	0.611919	-3.48401	0.000493966	0.00285998
1644	Cdk5r1	ENSMUSG00000048895.13	147.32	-1.45349	0.536877	-2.71087	0.00671073	0.0244182
1645	Il23r	ENSMUSG00000049093.9	36.978	-3.39118	0.760445	-4.04368	5.26178e-05	0.000431585
1646	Ccr2	ENSMUSG00000049103.14	242.862	-1.01985	0.35631	-2.86709	0.00414267	0.0164991
1647	Themis	ENSMUSG00000049109.15	8392.24	-1.32928	0.467418	-2.84597	0.00442769	0.0174182
1648	Ivl	ENSMUSG00000049128.7	4.28805	-3.15701	0.964687	-3.1844	0.00145052	0.0069963
1649	Skint7	ENSMUSG00000049214.13	58.9887	-5.77682	0.772448	-6.56953	5.04727e-11	2.03837e-09
1650	Hcar1	ENSMUSG00000049241.5	112.928	-2.89398	0.873984	-3.62446	0.000289568	0.00182079
1651	Kcnk3	ENSMUSG00000049265.7	316	-2.34555	0.930867	-3.05949	0.00221715	0.00991943
1652	Scn3b	ENSMUSG00000049281.16	46.1804	-1.93065	0.670192	-2.91234	0.00358727	0.0147026
1653	Sorl1	ENSMUSG00000049313.8	1250.53	-1.51339	0.61065	-2.49897	0.0124556	0.0401528
1654	Tenm2	ENSMUSG00000049336.16	10.7846	-2.40087	0.640572	-3.55145	0.000383118	0.00231323
1655	Krt8	ENSMUSG00000049382.9	1992.11	-3.70251	0.756025	-5.01249	5.37295e-07	7.99089e-06
1656	NA	ENSMUSG00000049410.8	8.24663	-4.4335	0.791872	-5.10023	3.39238e-07	5.36741e-06
1657	Pls1	ENSMUSG00000049493.13	117.057	-3.48365	0.447197	-7.70542	1.30412e-14	1.06432e-12
1658	Tmie	ENSMUSG00000049555.10	373.894	-1.99355	0.588524	-3.40073	0.000672051	0.00371011
1659	Lingo1	ENSMUSG00000049556.5	15.2109	-1.84362	0.649256	-2.82341	0.0047516	0.0184955
1660	Vsig8	ENSMUSG00000049598.9	14.0628	-3.56688	0.774753	-4.03812	5.38806e-05	0.000441019
1661	Gpr55	ENSMUSG00000049608.8	78.2821	-2.68225	0.524338	-5.0867	3.64352e-07	5.69079e-06
1662	C1ql3	ENSMUSG00000049630.6	25.1267	-3.25091	0.555117	-5.49809	3.83931e-08	7.79279e-07
1663	Aftph	ENSMUSG00000049659.15	2311.01	-1.02271	0.116343	-8.79056	1.48812e-18	2.14322e-16
1664	Cyp2g1	ENSMUSG00000049685.8	13.4891	-1.99262	0.977692	-2.90442	0.0036793	0.0150133
1665	Arl4c	ENSMUSG00000049866.12	2303.5	-1.04506	0.318536	-3.28129	0.00103335	0.00525993
1666	Rasd1	ENSMUSG00000049892.7	79.4906	-2.18119	0.848554	-2.6948	0.00704303	0.0253961
1667	Rasl11b	ENSMUSG00000049907.8	309.281	-2.43658	0.489264	-4.98124	6.31779e-07	9.24172e-06
1668	Skint9	ENSMUSG00000049972.4	7.29697	-2.29956	0.977614	-2.86724	0.00414075	0.0164981
1669	Tdrp	ENSMUSG00000050052.12	453.196	-5.51994	0.265143	-20.0814	1.07306e-89	4.20362e-86
1670	Klk6	ENSMUSG00000050063.18	4.41139	-3.61125	0.905835	-3.84515	0.000120479	0.000866307
1671	Grem2	ENSMUSG00000050069.3	27.1995	-1.94205	0.795153	-2.47064	0.0134871	0.0428365
1672	Gpr171	ENSMUSG00000050075.8	440.902	-1.28693	0.3108	-4.14198	3.44322e-05	0.000298781
1673	Tmc8	ENSMUSG00000050106.17	2023.67	-1.51433	0.211451	-7.16154	7.97759e-13	4.66439e-11
1674	Bpifc	ENSMUSG00000050108.12	16.3756	-2.49323	0.552528	-4.38989	1.13405e-05	0.000115631
1675	NA	ENSMUSG00000050179.3	592.88	-3.74157	0.510892	-7.33357	2.24107e-13	1.44394e-11
1676	Scd4	ENSMUSG00000050195.8	36.4581	-1.48378	0.546271	-2.71428	0.00664197	0.0242085
1677	Lgr4	ENSMUSG00000050199.13	215.921	-1.44463	0.583163	-2.48451	0.0129729	0.0414586
1678	Cxcr3	ENSMUSG00000050232.6	95.8817	-1.81876	0.76271	-2.43641	0.0148338	0.0462289
1679	Klre1	ENSMUSG00000050241.8	22.011	-4.08709	0.797506	-4.47488	7.64556e-06	8.20568e-05
1680	Mrgprg	ENSMUSG00000050276.7	11.9434	-3.66403	0.80766	-4.48108	7.42679e-06	8.0148e-05
1681	Foxc1	ENSMUSG00000050295.3	37.1498	-2.23987	0.462652	-4.79998	1.58685e-06	2.09869e-05
1682	Synpo2	ENSMUSG00000050315.13	450.406	-1.93285	0.547264	-3.54081	0.000398907	0.00238627
1683	Carmil2	ENSMUSG00000050357.9	7775.9	-2.11256	0.3767	-5.60994	2.02398e-08	4.41466e-07
1684	Olfr524	ENSMUSG00000050366.6	7.17818	-3.3635	0.826415	-4.08074	4.48934e-05	0.000375992
1685	C77080	ENSMUSG00000050390.12	297.58	-2.31408	0.455014	-5.09057	3.56994e-07	5.60781e-06
1686	Armcx6	ENSMUSG00000050394.14	84.9944	-1.52271	0.6094	-2.51079	0.012046	0.0390768
1687	Hamp	ENSMUSG00000050440.8	9.30671	-3.26112	0.719411	-3.77354	0.000160946	0.00110729
1688	Krt78	ENSMUSG00000050463.8	16.1663	-4.16477	0.857639	-4.78047	1.74883e-06	2.28819e-05
1689	Fbxl22	ENSMUSG00000050503.8	131.233	-1.60472	0.569185	-2.8171	0.00484588	0.0188177
1690	Pcdh20	ENSMUSG00000050505.7	3.88868	-2.47505	0.911638	-2.93538	0.00333144	0.0138218
1691	Oprd1	ENSMUSG00000050511.1	29.1122	-3.57728	0.680023	-4.65055	3.31057e-06	4.02259e-05
1692	NA	ENSMUSG00000050550.7	18.8602	-3.00071	0.980855	-3.5976	0.000321161	0.00199006
1693	Prokr2	ENSMUSG00000050558.13	152.39	-5.00254	0.609529	-7.95781	1.75112e-15	1.649e-13
1694	Lrrc4c	ENSMUSG00000050587.14	28.444	-1.45735	0.4324	-3.35801	0.000785047	0.0042096
1695	Fam78a	ENSMUSG00000050592.8	4065.23	-1.6766	0.373425	-4.49136	7.07707e-06	7.70104e-05
1696	Zfp831	ENSMUSG00000050600.5	318.451	-2.86356	0.689457	-4.23554	2.28001e-05	0.000210356
1697	Tmem150c	ENSMUSG00000050640.16	164.233	-2.07879	0.705099	-2.98835	0.0028049	0.0120192
1698	Arhgap42	ENSMUSG00000050730.17	118.833	-2.05556	0.308821	-6.64634	3.00472e-11	1.29348e-09
1699	Defb6	ENSMUSG00000050756.3	7.72032	-3.40164	0.900584	-3.8809	0.000104071	0.000766617
1700	Tmem37	ENSMUSG00000050777.7	78.2657	-1.81069	0.355506	-5.08688	3.64005e-07	5.69079e-06
1701	Clrn3	ENSMUSG00000050866.7	4.95953	-3.67479	0.832271	-4.24262	2.20923e-05	0.000205082
1702	Adgb	ENSMUSG00000050994.20	30.1947	-2.60893	0.660792	-3.92006	8.85278e-05	0.000667434
1703	Ttc24	ENSMUSG00000051036.12	15.0328	-2.95762	0.704962	-3.9288	8.53704e-05	0.000647869
1704	Olfml1	ENSMUSG00000051041.7	104.611	-3.80091	0.596661	-6.25775	3.90581e-10	1.29228e-08
1705	Gprc5c	ENSMUSG00000051043.16	90.6742	-1.49379	0.427821	-3.4944	0.000475135	0.00276813
1706	P4ha3	ENSMUSG00000051048.17	172.764	-2.45253	0.572971	-4.29079	1.78038e-05	0.000170525
1707	Mb21d2	ENSMUSG00000051065.8	58.1909	-1.80896	0.333937	-5.40245	6.57382e-08	1.26858e-06
1708	Rgs13	ENSMUSG00000051079.8	16.2766	-2.70894	0.893922	-3.10358	0.00191193	0.00879292
1709	NA	ENSMUSG00000051107.4	37.2537	-1.32454	0.528938	-2.51128	0.0120296	0.0390557
1710	Gpr183	ENSMUSG00000051212.7	182.781	-3.56341	0.579641	-6.13405	8.56717e-10	2.61379e-08
1711	Ffar2	ENSMUSG00000051314.11	40.9808	-2.29501	0.702581	-3.28979	0.00100261	0.00514088
1712	Samd3	ENSMUSG00000051354.14	27.6786	-3.01127	0.763518	-3.8596	0.000113571	0.000824197
1713	Six1	ENSMUSG00000051367.8	297.361	-3.45996	0.552988	-6.27061	3.59643e-10	1.19873e-08
1714	Fhad1	ENSMUSG00000051435.11	37.5183	-3.38419	0.518748	-6.23788	4.43542e-10	1.44794e-08
1715	Kcnj16	ENSMUSG00000051497.15	79.6901	-3.33595	0.514975	-6.33422	2.38546e-10	8.25791e-09
1716	Ufsp1	ENSMUSG00000051502.6	156.207	-2.64577	0.592272	-4.47265	7.72559e-06	8.28249e-05
1717	Wdfy4	ENSMUSG00000051506.16	1350.58	-1.62999	0.648192	-2.54655	0.0108792	0.0360051
1718	Otop1	ENSMUSG00000051596.13	118.966	-2.66233	0.930492	-3.35199	0.000802341	0.00428681
1719	Krt9	ENSMUSG00000051617.3	6.49207	-3.32087	0.863448	-3.89992	9.62235e-05	0.000717172
1720	Kcnf1	ENSMUSG00000051726.6	53.5541	-2.17197	0.562156	-3.85819	0.00011423	0.00082806
1721	Adam6b	ENSMUSG00000051804.3	2.41535	-2.09306	0.919251	-2.47415	0.0133554	0.0424938
1722	E230016K23Rik	ENSMUSG00000051832.7	6.57516	-2.06548	0.756822	-2.62686	0.00861773	0.0298595
1723	Krt71	ENSMUSG00000051879.3	5.22886	-3.65558	0.873154	-4.07382	4.62475e-05	0.000385468
1724	Tlr11	ENSMUSG00000051969.7	88.4664	-2.25657	0.540771	-4.18198	2.8898e-05	0.000258105
1725	Casr	ENSMUSG00000051980.13	7.57948	-2.60803	0.883598	-2.96204	0.00305603	0.0128854
1726	Lax1	ENSMUSG00000051998.14	1076.57	-1.44166	0.519253	-2.78177	0.0054063	0.0206214
1727	Slc6a7	ENSMUSG00000052026.7	22.2298	-2.88424	0.742066	-3.81746	0.00013483	0.00095409
1728	Klf13	ENSMUSG00000052040.10	6633.62	-1.09796	0.288953	-3.80016	0.0001446	0.00101479
1729	1700029F12Rik	ENSMUSG00000052075.6	28.8972	-4.71191	0.838458	-4.92637	8.37716e-07	1.18987e-05
1730	Rgs14	ENSMUSG00000052087.13	2070.32	-1.31082	0.199512	-6.57005	5.02981e-11	2.03551e-09
1731	Mtcl1	ENSMUSG00000052105.16	159.365	-3.28427	0.527353	-6.21626	5.09153e-10	1.63757e-08
1732	Rasal3	ENSMUSG00000052142.15	6450.55	-1.07863	0.227483	-4.74165	2.11986e-06	2.71916e-05
1733	Serpinb6c	ENSMUSG00000052180.14	6.48747	-2.2929	0.80022	-2.65186	0.00800493	0.0281192
1734	Epx	ENSMUSG00000052234.2	2.93604	-2.59791	0.927158	-2.91949	0.00350609	0.014418
1735	B630019K06Rik	ENSMUSG00000052364.4	17.6796	-1.47185	0.497501	-2.95064	0.00317115	0.0132823
1736	Mogat2	ENSMUSG00000052396.7	4.62522	-2.62118	0.955145	-2.90163	0.00371229	0.0151044
1737	Tchh	ENSMUSG00000052415.5	37.7874	-2.52567	0.660875	-3.81747	0.000134829	0.00095409
1738	Robo2	ENSMUSG00000052516.17	24.1037	-3.65524	0.648257	-4.86014	1.17303e-06	1.61462e-05
1739	Pbx1	ENSMUSG00000052534.15	321.764	-1.39441	0.416889	-3.3487	0.000811904	0.00432375
1740	Dlg2	ENSMUSG00000052572.16	193.969	-4.00603	0.51592	-7.70893	1.26873e-14	1.03977e-12
1741	NA	ENSMUSG00000052629.5	6.75191	-2.24274	0.775761	-2.66136	0.00778248	0.0275104
1742	Sh2d6	ENSMUSG00000052631.14	11.3462	-3.39069	0.639423	-4.72282	2.32596e-06	2.94305e-05
1743	Rab7b	ENSMUSG00000052688.12	228.809	-1.03812	0.397997	-2.6113	0.00902	0.0310282
1744	Klrc2	ENSMUSG00000052736.15	10.482	-4.265	0.840481	-4.80271	1.56534e-06	2.07304e-05
1745	Gpr25	ENSMUSG00000052759.7	16.7655	-1.51035	0.459694	-3.2597	0.00111532	0.00561586
1746	Oas1a	ENSMUSG00000052776.10	174.915	-2.50523	0.634789	-3.98239	6.82263e-05	0.000535396
1747	Smarca5-ps	ENSMUSG00000052912.7	4.23158	-2.39404	0.892125	-2.94577	0.00322152	0.013457
1748	Cyp2f2	ENSMUSG00000052974.8	35.8928	-3.44063	0.645883	-5.12408	2.98992e-07	4.83596e-06
1749	Ube2ql1	ENSMUSG00000052981.5	34.9161	-1.58255	0.631891	-2.53113	0.0113694	0.0373457
1750	Sv2b	ENSMUSG00000053025.13	44.4024	-4.28868	0.759366	-4.83626	1.32307e-06	1.78848e-05
1751	Cd8b1	ENSMUSG00000053044.8	14828.9	-5.98913	0.443381	-13.5397	9.11427e-42	9.91785e-39
1752	Gpr141	ENSMUSG00000053101.2	22.9173	-2.02221	0.715488	-2.84644	0.0044211	0.0173957
1753	Mapk11	ENSMUSG00000053137.6	381.518	-2.39636	0.41249	-5.81291	6.13947e-09	1.528e-07
1754	Btn2a2	ENSMUSG00000053216.14	8.91881	-1.99118	0.780772	-2.51111	0.0120351	0.0390647
1755	Slamf8	ENSMUSG00000053318.7	88.5419	-2.20951	0.559803	-3.9588	7.53261e-05	0.00058409
1756	Lgals7	ENSMUSG00000053522.11	28.1797	-1.64337	0.677638	-2.42716	0.0152176	0.0472073
1757	A530021J07Rik	ENSMUSG00000053528.6	8.65854	-4.02485	0.791901	-4.78106	1.74374e-06	2.28306e-05
1758	NA	ENSMUSG00000053541.3	228.314	-1.93506	0.877373	-2.44704	0.0144035	0.0450529
1759	Gper1	ENSMUSG00000053647.4	20.6491	-2.62699	0.64284	-3.942	8.08038e-05	0.000619939
1760	Krt42	ENSMUSG00000053654.7	3.00217	-2.40277	0.938009	-2.72281	0.00647294	0.0237527
1761	Nebl	ENSMUSG00000053702.16	2346.11	-3.72411	0.494086	-7.56173	3.97741e-14	2.93983e-12
1762	Egfbp2	ENSMUSG00000053719.10	2.9918	-3.15873	0.904321	-3.42898	0.00060585	0.00340706
1763	Ptrh1	ENSMUSG00000053746.8	166.592	-2.19068	0.385894	-5.67345	1.39951e-08	3.20558e-07
1764	Oas1f	ENSMUSG00000053765.4	3.13428	-2.81493	0.926602	-3.10223	0.00192067	0.00882273
1765	Krt16	ENSMUSG00000053797.10	13.4723	-3.7383	0.782616	-4.10942	3.9665e-05	0.000336329
1766	H2-T24	ENSMUSG00000053835.17	653.715	-2.60562	0.576924	-4.54254	5.55808e-06	6.29648e-05
1767	Sh2d4a	ENSMUSG00000053886.4	59.4464	-2.78322	0.557218	-4.95009	7.41775e-07	1.06441e-05
1768	Shisa6	ENSMUSG00000053930.13	139.965	-6.20903	0.752622	-7.12472	1.04296e-12	6.00836e-11
1769	Cd8a	ENSMUSG00000053977.13	21897.1	-3.15315	0.674374	-4.73092	2.23499e-06	2.84265e-05
1770	Klk13	ENSMUSG00000054046.7	7.11588	-2.83038	0.771125	-3.36598	0.000762718	0.00411553
1771	NA	ENSMUSG00000054061.8	2.01639	-2.20692	0.93655	-2.46067	0.0138677	0.0438107
1772	Umodl1	ENSMUSG00000054134.13	10.8119	-4.07602	0.831381	-4.71236	2.44867e-06	3.07252e-05
1773	Adm2	ENSMUSG00000054136.5	5.23941	-2.85338	0.807721	-3.2132	0.00131266	0.00643904
1774	Krt15	ENSMUSG00000054146.8	5.59137	-3.16157	0.892534	-3.63376	0.000279323	0.00176715
1775	Syne3	ENSMUSG00000054150.11	762.809	-1.32142	0.33864	-3.90357	9.47859e-05	0.000708345
1776	Gm4894	ENSMUSG00000054156.8	16.7972	-3.35922	0.769126	-4.03895	5.36904e-05	0.000439647
1777	Spock3	ENSMUSG00000054162.15	19.6237	-3.7156	0.736596	-4.254	2.09987e-05	0.000196139
1778	Ffar4	ENSMUSG00000054200.6	46.6108	-3.14663	0.697613	-4.45941	8.21858e-06	8.72979e-05
1779	Ifi205	ENSMUSG00000054203.7	138.743	-2.61469	0.518813	-5.04266	4.59095e-07	6.98159e-06
1780	Lifr	ENSMUSG00000054263.11	1758.29	-2.63994	0.592543	-4.47889	7.50332e-06	8.07958e-05
1781	P2ry10b	ENSMUSG00000054293.10	209.216	-2.50602	0.462354	-5.42065	5.93818e-08	1.16079e-06
1782	Lrrc36	ENSMUSG00000054320.16	5.12919	-2.33601	0.824217	-2.73438	0.00624976	0.0231188
1783	Cadps	ENSMUSG00000054423.13	51.9011	-4.8961	0.730864	-5.51456	3.49651e-08	7.22427e-07
1784	Tmem120b	ENSMUSG00000054434.14	756.717	-1.18094	0.333122	-3.54543	0.000391968	0.00235824
1785	Aes	ENSMUSG00000054452.10	8451.58	-1.22934	0.280777	-4.37859	1.19451e-05	0.000121231
1786	Sh3bp2	ENSMUSG00000054520.15	648.723	-1.0894	0.366954	-2.96986	0.00297931	0.0126202
1787	Adam12	ENSMUSG00000054555.11	781.066	-2.98686	0.37518	-7.96264	1.68407e-15	1.60126e-13
1788	NA	ENSMUSG00000054556.6	6.46449	-1.93324	0.755922	-2.4905	0.0127564	0.0409138
1789	Xlr	ENSMUSG00000054626.11	23.0317	-2.34708	0.556333	-4.11956	3.79591e-05	0.000325101
1790	Ano9	ENSMUSG00000054662.8	7.09198	-2.07798	0.775896	-2.59055	0.00958238	0.0325725
1791	Dsp	ENSMUSG00000054889.9	2014.08	-2.19036	0.792015	-2.82969	0.0046593	0.0182086
1792	Txk	ENSMUSG00000054892.14	1225.9	-1.67124	0.454611	-3.68111	0.000232221	0.00151214
1793	Afp	ENSMUSG00000054932.6	33.8871	-3.01213	0.548395	-5.24669	1.54858e-07	2.68887e-06
1794	Kcnmb4	ENSMUSG00000054934.10	407.123	-1.96598	0.58996	-3.34075	0.000835537	0.00442794
1795	Smyd1	ENSMUSG00000055027.17	266.409	-3.71836	0.555666	-6.68829	2.25791e-11	9.93833e-10
1796	NA	ENSMUSG00000055108.6	14.4257	-2.30088	0.724598	-3.11682	0.00182812	0.00848113
1797	Arntl	ENSMUSG00000055116.8	1571.91	-1.08195	0.322224	-3.35797	0.000785163	0.0042096
1798	Ifng	ENSMUSG00000055170.4	3.61632	-2.65948	0.931077	-2.99388	0.00275454	0.0118292
1799	Sertad3	ENSMUSG00000055200.7	350.802	-1.03337	0.165373	-6.24815	4.15339e-10	1.36701e-08
1800	Ntrk2	ENSMUSG00000055254.14	219.717	-3.34827	0.857384	-4.21054	2.5476e-05	0.000231329
1801	Tns1	ENSMUSG00000055322.15	2888.99	-1.81305	0.49033	-3.70321	0.00021289	0.0014088
1802	Fat2	ENSMUSG00000055333.14	139.817	-2.60918	0.817814	-3.35061	0.00080635	0.00430291
1803	Slc6a2	ENSMUSG00000055368.14	4.04422	-2.13702	0.955529	-2.52309	0.0116329	0.0380516
1804	Atp10b	ENSMUSG00000055415.7	7.73037	-2.60438	0.857891	-2.86713	0.00414218	0.0164991
1805	Nap1l5	ENSMUSG00000055430.4	4.1381	-2.81283	0.857268	-3.41342	0.000641536	0.0035749
1806	Cd47	ENSMUSG00000055447.18	4131.79	-1.61619	0.182728	-8.84503	9.1505e-19	1.36817e-16
1807	Timd4	ENSMUSG00000055546.6	256	-2.74285	0.750615	-3.78847	0.00015158	0.00105321
1808	Spink5	ENSMUSG00000055561.9	42.9103	-4.0265	0.751789	-5.17326	2.30045e-07	3.81856e-06
1809	Kbtbd11	ENSMUSG00000055675.6	2536.57	-1.19385	0.477878	-2.50499	0.0122457	0.0395736
1810	Ces2a	ENSMUSG00000055730.16	1.90214	-2.15457	0.926966	-2.44639	0.0144293	0.0451185
1811	Ghr	ENSMUSG00000055737.12	597.039	-3.02765	0.730471	-4.22675	2.37096e-05	0.000217721
1812	Abcd2	ENSMUSG00000055782.8	234.093	-3.07811	0.65214	-4.75156	2.01856e-06	2.60802e-05
1813	Fmnl1	ENSMUSG00000055805.15	6479.53	-1.8644	0.319805	-5.8307	5.51953e-09	1.39678e-07
1814	Dnaaf3	ENSMUSG00000055809.7	29.8398	-1.61504	0.607764	-2.67424	0.00748985	0.0266734
1815	Gm14137	ENSMUSG00000055926.2	12.7723	-2.83003	0.724868	-3.73641	0.000186665	0.0012625
1816	Skint4	ENSMUSG00000055960.12	20.9449	-3.20129	0.884944	-3.5454	0.000392017	0.00235824
1817	Triqk	ENSMUSG00000055963.12	18.987	-1.43073	0.54778	-2.61672	0.00887784	0.0306415
1818	NA	ENSMUSG00000055972.5	44.6185	-3.36228	0.703737	-4.70082	2.59113e-06	3.22443e-05
1819	Nod2	ENSMUSG00000055994.15	67.5574	-1.4328	0.498673	-2.88553	0.00390753	0.0157289
1820	Rgs9bp	ENSMUSG00000056043.5	27.993	-1.53637	0.468131	-3.27647	0.00105113	0.00533517
1821	S100a8	ENSMUSG00000056054.9	89.5888	-2.34597	0.824746	-2.99756	0.00272148	0.0117027
1822	Sag	ENSMUSG00000056055.13	45.5849	-1.30014	0.382974	-3.39375	0.000689419	0.00378663
1823	Fam105a	ENSMUSG00000056069.8	1249.03	-1.80817	0.268716	-6.72928	1.70509e-11	7.6953e-10
1824	S100a9	ENSMUSG00000056071.12	141.485	-2.28731	0.89854	-2.84426	0.00445153	0.0175049
1825	Lipm	ENSMUSG00000056078.5	10.0902	-3.23567	0.78353	-3.61886	0.000295909	0.00185649
1826	NA	ENSMUSG00000056128.3	6.84265	-3.01611	0.931757	-3.46027	0.000539637	0.00308519
1827	Pla2g4a	ENSMUSG00000056220.14	116.323	-1.10154	0.326178	-3.38012	0.000724531	0.00394251
1828	Spock1	ENSMUSG00000056222.14	12.442	-3.78506	0.737483	-4.29781	1.72496e-05	0.000165784
1829	Kcnq3	ENSMUSG00000056258.8	160.372	-5.5039	0.7569	-6.0537	1.41554e-09	4.1015e-08
1830	Ms4a4b	ENSMUSG00000056290.15	759.315	-3.47332	0.725872	-4.93151	8.15956e-07	1.16149e-05
1831	Synpr	ENSMUSG00000056296.16	68.771	-3.08973	0.92413	-3.89171	9.95401e-05	0.000737681
1832	Tcim	ENSMUSG00000056313.5	246.019	-2.00207	0.415039	-4.82706	1.38564e-06	1.86021e-05
1833	Gpr50	ENSMUSG00000056380.13	3.34771	-3.31124	0.908002	-3.55688	0.000375285	0.00227295
1834	Hoxaas2	ENSMUSG00000056445.8	14.8506	-2.25751	0.66267	-3.31406	0.000919521	0.00479327
1835	A930024E05Rik	ENSMUSG00000056735.5	287.675	-1.68673	0.290125	-5.81345	6.1197e-09	1.528e-07
1836	A730036I17Rik	ENSMUSG00000056738.11	5.1274	-2.71302	0.862154	-2.97144	0.00296408	0.0125693
1837	Dnah9	ENSMUSG00000056752.16	90.0361	-4.74839	0.713711	-6.14003	8.25058e-10	2.52506e-08
1838	Glipr1	ENSMUSG00000056888.11	653.273	-2.19081	0.47329	-4.63596	3.55283e-06	4.25883e-05
1839	Ces1d	ENSMUSG00000056973.6	916.316	-4.00982	0.833381	-5.23488	1.65094e-07	2.83907e-06
1840	Hamp2	ENSMUSG00000056978.8	7.74152	-2.22943	0.85898	-2.99232	0.00276864	0.0118794
1841	Myh4	ENSMUSG00000057003.12	6.95166	-2.97992	0.793771	-3.39801	0.000678772	0.00373983
1842	Trim12c	ENSMUSG00000057143.15	975.825	-1.3857	0.254685	-5.44151	5.28322e-08	1.04633e-06
1843	Prss2	ENSMUSG00000057163.3	15.634	-4.20446	0.762612	-5.13456	2.82806e-07	4.60077e-06
1844	Musk	ENSMUSG00000057280.15	7.48642	-2.24514	0.791223	-2.71059	0.00671635	0.0244297
1845	Arhgap24	ENSMUSG00000057315.14	225.881	-3.44279	0.266344	-12.831	1.09946e-37	8.61408e-35
1846	Apol9a	ENSMUSG00000057346.11	24.7782	-2.41669	0.560787	-4.22986	2.33839e-05	0.000215336
1847	Lypd3	ENSMUSG00000057454.5	10.4759	-2.41834	0.882803	-2.7237	0.00645546	0.0237051
1848	Saa2	ENSMUSG00000057465.5	5.4465	-2.10868	0.956043	-2.6049	0.00919008	0.0314586
1849	Trim30d	ENSMUSG00000057596.13	243.8	-2.04174	0.558788	-3.67734	0.000235678	0.00153007
1850	Gnai1	ENSMUSG00000057614.6	134.322	-3.18164	0.740991	-4.36552	1.26819e-05	0.000127189
1851	Mex3b	ENSMUSG00000057706.7	679.943	-1.35593	0.308735	-4.39176	1.12437e-05	0.000114823
1852	A830018L16Rik	ENSMUSG00000057715.13	38.2376	-3.38869	0.597186	-5.42454	5.81025e-08	1.14034e-06
1853	Tmem178b	ENSMUSG00000057716.6	25.4247	-3.10467	0.776534	-3.78667	0.000152677	0.00105791
1854	Sh3rf2	ENSMUSG00000057719.10	11.9522	-2.46993	0.799384	-3.00531	0.00265312	0.0114621
1855	Megf6	ENSMUSG00000057751.14	166.251	-3.13546	0.425386	-7.34332	2.08355e-13	1.34688e-11
1856	NA	ENSMUSG00000057913.2	22.2696	-2.27089	0.961694	-2.96862	0.00299143	0.012666
1857	Cacnb2	ENSMUSG00000057914.15	17.7415	-2.66636	0.850902	-3.04215	0.00234891	0.0103762
1858	Gsta2	ENSMUSG00000057933.10	3.50021	-3.24961	0.872961	-3.67028	0.00024228	0.00156774
1859	Serpinb3d	ENSMUSG00000058017.6	9.39924	-2.70849	0.921887	-3.32226	0.000892899	0.00467782
1860	Adtrp	ENSMUSG00000058022.13	69.0345	-2.57442	0.832956	-3.21017	0.00132655	0.00650229
1861	Palld	ENSMUSG00000058056.16	769.82	-1.96316	0.581051	-3.38127	0.000721529	0.00393118
1862	Sez6l	ENSMUSG00000058153.15	26.1761	-2.2003	0.738374	-3.0036	0.00266802	0.0115107
1863	Kcnh1	ENSMUSG00000058248.12	88.1248	-3.50203	0.547776	-6.28624	3.25248e-10	1.09461e-08
1864	Tspan7	ENSMUSG00000058254.12	260.382	-1.57551	0.567422	-2.79121	0.00525112	0.02012
1865	Serpina9	ENSMUSG00000058260.2	3.92596	-2.70463	0.900476	-3.16694	0.00154051	0.00734873
1866	Spock2	ENSMUSG00000058297.16	913.867	-1.85369	0.721638	-2.59111	0.00956681	0.0325314
1867	Qrfpr	ENSMUSG00000058400.13	7.56578	-2.12678	0.831384	-2.46352	0.0137581	0.0435348
1868	Kcnt1	ENSMUSG00000058740.14	4.037	-2.22226	0.847337	-2.5579	0.0105306	0.0351146
1869	Fam57b	ENSMUSG00000058966.13	28.2161	-2.1707	0.808483	-2.70496	0.00683123	0.0247692
1870	Kcnc1	ENSMUSG00000058975.7	41.8163	-3.56892	0.580608	-5.57049	2.54031e-08	5.42016e-07
1871	Klk1b9	ENSMUSG00000059042.3	2.16397	-3.06073	0.908824	-3.23673	0.00120906	0.00601674
1872	Pth	ENSMUSG00000059077.6	54.8879	-3.9345	0.966105	-4.35364	1.33898e-05	0.000133401
1873	Ntrk3	ENSMUSG00000059146.12	1433.53	-3.04945	0.252086	-12.0941	1.13466e-33	6.34988e-31
1874	Mfsd4a	ENSMUSG00000059149.17	43.1652	-2.21277	0.472015	-4.65787	3.19493e-06	3.89658e-05
1875	Pde1a	ENSMUSG00000059173.19	50.3981	-1.9373	0.779526	-2.53559	0.0112259	0.0369612
1876	Lep	ENSMUSG00000059201.12	127.624	-3.88863	0.836875	-4.67146	2.9907e-06	3.68189e-05
1877	Mamld1	ENSMUSG00000059401.13	41.1249	-1.00866	0.359429	-2.80598	0.00501644	0.0193763
1878	Fxyd2	ENSMUSG00000059412.7	734.437	-5.83859	0.619146	-9.38645	6.20573e-21	1.21552e-18
1879	Ptk2b	ENSMUSG00000059456.13	3243.36	-1.87145	0.386045	-4.85071	1.2302e-06	1.68503e-05
1880	Calcrl	ENSMUSG00000059588.13	705.834	-1.19887	0.252155	-4.7553	1.98154e-06	2.56871e-05
1881	Reg1	ENSMUSG00000059654.7	1.60488	-2.61658	0.94779	-2.66931	0.00760068	0.0269554
1882	Krt4	ENSMUSG00000059668.5	5.17529	-2.56162	0.890483	-2.79087	0.00525673	0.0201376
1883	Cdh24	ENSMUSG00000059674.6	1222.58	-1.40055	0.37611	-3.72426	0.000195888	0.00131535
1884	Atl2	ENSMUSG00000059811.12	4544.94	-1.87612	0.248948	-7.53649	4.82776e-14	3.48934e-12
1885	Kprp	ENSMUSG00000059832.4	1.94826	-2.69648	0.955608	-2.72893	0.0063541	0.0234031
1886	Hydin	ENSMUSG00000059854.8	19.9383	-2.99695	0.738485	-3.77755	0.000158376	0.00109114
1887	Dsc3	ENSMUSG00000059898.8	414.393	-2.34215	0.757235	-3.16965	0.00152621	0.00729829
1888	4930453N24Rik	ENSMUSG00000059920.9	615.323	-1.01184	0.221967	-4.55865	5.1483e-06	5.91089e-05
1889	Serpinb12	ENSMUSG00000059956.14	13.9858	-3.60285	0.746722	-4.08302	4.44539e-05	0.000372899
1890	Nptx2	ENSMUSG00000059991.7	22.1109	-3.23297	0.72019	-4.33974	1.42649e-05	0.000140972
1891	Chpt1	ENSMUSG00000060002.14	1376.1	-2.88668	0.733567	-4.02125	5.78896e-05	0.000468741
1892	Tmem26	ENSMUSG00000060044.8	156.783	-1.09702	0.358105	-3.06749	0.00215862	0.0096997
1893	Olfr60	ENSMUSG00000060112.4	8.26192	-2.5377	0.863414	-3.25631	0.00112872	0.00567458
1894	Cxcl11	ENSMUSG00000060183.6	20.5597	-4.28375	0.819976	-5.03866	4.68795e-07	7.11254e-06
1895	Pyroxd2	ENSMUSG00000060224.3	90.7403	-1.55958	0.5185	-3.00746	0.00263443	0.0113959
1896	Cend1	ENSMUSG00000060240.12	5.69071	-2.47706	0.804792	-2.79605	0.00517308	0.0198833
1897	Nrg2	ENSMUSG00000060275.11	103.927	-2.36749	0.714849	-3.34208	0.000831526	0.00440787
1898	NA	ENSMUSG00000060311.10	2.051	-2.356	0.967909	-2.46118	0.0138481	0.0437557
1899	Chst8	ENSMUSG00000060402.7	25.4808	-3.69557	0.53654	-6.35239	2.11997e-10	7.38859e-09
1900	Sntb1	ENSMUSG00000060429.11	61.0089	-3.52193	0.72913	-4.79938	1.59155e-06	2.10349e-05
1901	Trim5	ENSMUSG00000060441.15	224.154	-2.79657	0.379466	-7.35566	1.89983e-13	1.24455e-11
1902	Samd5	ENSMUSG00000060487.6	124.435	-2.31003	0.706375	-3.30091	0.000963705	0.00498313
1903	Xcr1	ENSMUSG00000060509.4	133.593	-2.87963	0.533969	-5.39366	6.90368e-08	1.32701e-06
1904	H2-Eb1	ENSMUSG00000060586.10	7332.31	-3.11843	0.507669	-6.16738	6.94316e-10	2.14504e-08
1905	Pla2g16	ENSMUSG00000060675.13	906.48	-2.72635	0.509585	-5.36319	8.17657e-08	1.53995e-06
1906	Plekhh1	ENSMUSG00000060716.7	29.3288	-1.81528	0.567789	-3.18931	0.00142613	0.00689573
1907	Gmfg	ENSMUSG00000060791.15	1480.33	-2.87987	0.476384	-6.05427	1.41052e-09	4.09303e-08
1908	Csmd1	ENSMUSG00000060924.15	61.0493	-2.78788	0.59977	-4.61431	3.94402e-06	4.66495e-05
1909	Slc4a4	ENSMUSG00000060961.14	304.93	-3.13545	0.643188	-4.9233	8.50948e-07	1.20692e-05
1910	Irx1	ENSMUSG00000060969.8	3.40395	-2.51532	0.930177	-2.8759	0.00402876	0.0161472
1911	Hist1h4h	ENSMUSG00000060981.6	8.09946	-2.69626	0.655546	-3.76437	0.00016697	0.00114511
1912	Tdrd5	ENSMUSG00000060985.15	1039.66	-2.47949	0.607874	-4.1012	4.11006e-05	0.000347748
1913	Mkx	ENSMUSG00000061013.5	21.6261	-1.84396	0.775399	-2.42893	0.0151433	0.0470142
1914	Mcpt4	ENSMUSG00000061068.6	26.3709	-3.26079	0.828366	-3.84999	0.000118123	0.000853124
1915	Lsamp	ENSMUSG00000061080.11	14.6972	-1.62702	0.6211	-2.61521	0.00891729	0.0307569
1916	Retnla	ENSMUSG00000061100.3	208.827	-5.25033	0.816254	-5.93452	2.94714e-09	7.92498e-08
1917	Cyp4f39	ENSMUSG00000061126.4	5.34145	-2.13536	0.786789	-2.50155	0.0123651	0.0398938
1918	Spink12	ENSMUSG00000061144.5	2.62623	-2.87422	0.953586	-2.95832	0.0030932	0.0130182
1919	Tmprss11d	ENSMUSG00000061259.11	4.24071	-2.84505	0.88852	-3.33477	0.000853691	0.00451072
1920	Cxcl12	ENSMUSG00000061353.11	3439.49	-4.03696	0.156061	-25.854	2.19207e-147	4.29361e-143
1921	Zcchc14	ENSMUSG00000061410.6	203.499	-1.22324	0.390947	-3.13195	0.00173648	0.00811753
1922	Sox21	ENSMUSG00000061517.8	5.09246	-2.81658	0.871817	-3.05951	0.00221702	0.00991943
1923	Dpp6	ENSMUSG00000061576.15	132.947	-3.35889	0.544635	-6.15007	7.74495e-10	2.38898e-08
1924	Pclo	ENSMUSG00000061601.15	123.701	-2.80116	0.70126	-4.04228	5.29332e-05	0.000433808
1925	Tnnt3	ENSMUSG00000061723.18	66.889	-3.94248	0.561216	-6.7593	1.38661e-11	6.39048e-10
1926	Klra6	ENSMUSG00000061769.2	5.6532	-3.48887	0.918336	-3.78539	0.00015347	0.00106257
1927	Cfd	ENSMUSG00000061780.6	3075.29	-2.44601	0.928039	-3.07641	0.00209506	0.00946403
1928	Myl1	ENSMUSG00000061816.15	46.5213	-2.64482	0.910081	-3.17048	0.00152186	0.00728105
1929	Ces2c	ENSMUSG00000061825.10	6.84202	-2.98023	0.766084	-3.36924	0.000753744	0.00407721
1930	Patj	ENSMUSG00000061859.16	1401.3	-1.37891	0.307188	-4.48964	7.1344e-06	7.74621e-05
1931	Sphk1	ENSMUSG00000061878.15	103.474	-2.97663	0.429123	-6.89822	5.26566e-12	2.66508e-10
1932	Dsg1b	ENSMUSG00000061928.6	7.3521	-3.37913	0.859469	-3.98248	6.81998e-05	0.000535396
1933	Hsh2d	ENSMUSG00000062007.13	176.702	-1.6704	0.624603	-2.69397	0.0070606	0.025441
1934	Opcml	ENSMUSG00000062257.13	90.6632	-3.88418	0.512467	-7.28859	3.1322e-13	1.97268e-11
1935	Erbb2	ENSMUSG00000062312.5	84.0232	-1.28882	0.368915	-3.4935	0.000476739	0.00277583
1936	Cytl1	ENSMUSG00000062329.4	17.2337	-2.13212	0.86145	-2.52451	0.0115861	0.037924
1937	Serpinb2	ENSMUSG00000062345.10	33.2296	-1.92623	0.764362	-2.52765	0.0114827	0.0376486
1938	Otof	ENSMUSG00000062372.13	16.7358	-3.31208	0.750057	-4.11476	3.87585e-05	0.000330215
1939	Dgkk	ENSMUSG00000062393.13	11.8783	-3.32776	0.781266	-3.79858	0.000145527	0.00101983
1940	Ap3b2	ENSMUSG00000062444.14	3.71878	-2.36243	0.831463	-2.69465	0.0070463	0.0254033
1941	Ifit3b	ENSMUSG00000062488.9	54.927	-3.69101	0.688876	-5.14765	2.63763e-07	4.33417e-06
1942	Fabp4	ENSMUSG00000062515.3	6668.08	-2.32409	0.828125	-2.91647	0.00354018	0.0145309
1943	Tlr12	ENSMUSG00000062545.4	689.306	-1.04011	0.392985	-2.64782	0.00810128	0.0283864
1944	Cys1	ENSMUSG00000062563.14	17.2586	-2.01774	0.786389	-2.5923	0.00953356	0.0324472
1945	Btnl1	ENSMUSG00000062638.10	3.8187	-2.48955	0.820912	-2.83355	0.00460345	0.0180047
1946	AI413582	ENSMUSG00000062753.13	240.51	-1.27349	0.205337	-6.20146	5.59404e-10	1.77298e-08
1947	1810041L15Rik	ENSMUSG00000062760.10	199.238	-6.22913	0.686659	-7.56549	3.86398e-14	2.87771e-12
1948	Ces2f	ENSMUSG00000062826.7	51.1634	-4.61353	0.633639	-6.58068	4.68314e-11	1.915e-09
1949	Phactr2	ENSMUSG00000062866.16	293.873	-1.60535	0.244017	-6.57973	4.7131e-11	1.92324e-09
1950	Cped1	ENSMUSG00000062980.15	133.215	-2.51658	0.658062	-3.8531	0.000116634	0.000843613
1951	Ica1	ENSMUSG00000062995.12	50.3289	-1.19713	0.45499	-2.63655	0.00837528	0.0291587
1952	Ctnna2	ENSMUSG00000063063.12	5.27017	-2.66566	0.837738	-2.98122	0.002871	0.0122435
1953	NA	ENSMUSG00000063109.13	1289.57	-5.75508	0.575015	-10.0335	1.08543e-23	2.83471e-21
1954	Calml3	ENSMUSG00000063130.3	25.2673	-4.50264	0.705603	-5.1144	3.14737e-07	5.04894e-06
1955	Kcnma1	ENSMUSG00000063142.14	141.349	-1.94673	0.596804	-3.27987	0.00103856	0.00527959
1956	Csn2	ENSMUSG00000063157.9	64.4283	-5.73171	0.70726	-6.19324	5.89403e-10	1.85605e-08
1957	Rps4l	ENSMUSG00000063171.4	86.9007	-2.71871	0.323004	-8.35693	6.43732e-17	7.28831e-15
1958	Grm4	ENSMUSG00000063239.16	33.4794	-3.16471	0.694184	-4.4335	9.27134e-06	9.69038e-05
1959	NA	ENSMUSG00000063286.7	1495.48	-1.79392	0.691063	-2.64189	0.00824457	0.0287649
1960	Tmem117	ENSMUSG00000063296.4	9.42454	-2.22763	0.662516	-3.24986	0.00115464	0.00578411
1961	Cyp26b1	ENSMUSG00000063415.12	175.495	-1.67536	0.68507	-2.44839	0.0143497	0.0449563
1962	Ddo	ENSMUSG00000063428.8	56.8166	-2.85217	0.900936	-3.50658	0.000453909	0.00266509
1963	Wscd2	ENSMUSG00000063430.9	14.076	-3.98625	0.855958	-4.60971	4.03231e-06	4.76195e-05
1964	Aox1	ENSMUSG00000063558.4	149.553	-3.18692	0.473455	-6.70352	2.03458e-11	9.01613e-10
1965	Krt73	ENSMUSG00000063661.5	2.99528	-2.52011	0.937153	-2.82843	0.00467775	0.0182698
1966	Tnfrsf11b	ENSMUSG00000063727.3	55.4745	-1.69878	0.638165	-2.66632	0.00766862	0.0271535
1967	Rnf217	ENSMUSG00000063760.9	63.2514	-1.74466	0.337391	-5.16261	2.43534e-07	4.01863e-06
1968	Chil4	ENSMUSG00000063779.6	17.4948	-4.53034	0.821509	-5.19354	2.06331e-07	3.45714e-06
1969	Rnf183	ENSMUSG00000063851.12	19.3775	-3.77288	0.709943	-4.39467	1.10941e-05	0.000113413
1970	Slc24a3	ENSMUSG00000063873.10	157.361	-2.59893	0.709781	-3.70216	0.000213772	0.00141219
1971	Nlgn1	ENSMUSG00000063887.13	57.2652	-4.29259	0.704839	-5.722	1.05275e-08	2.48136e-07
1972	Klk1	ENSMUSG00000063903.5	22.2785	-4.20276	0.787185	-4.60902	4.04579e-06	4.77378e-05
1973	Zar1	ENSMUSG00000063935.3	9.67823	-3.78585	0.798281	-4.58355	4.57149e-06	5.30537e-05
1974	Slco1a5	ENSMUSG00000063975.13	9.08336	-2.77092	0.779924	-3.1893	0.00142618	0.00689573
1975	Hcst	ENSMUSG00000064109.8	218.284	-1.47301	0.389979	-3.77868	0.000157659	0.00108696
1976	Ifi27	ENSMUSG00000064215.13	2320.96	-1.02426	0.360524	-2.84211	0.00448158	0.0175875
1977	Gsdma3	ENSMUSG00000064224.10	3.06531	-2.02436	0.915396	-2.47178	0.0134443	0.042728
1978	Paqr9	ENSMUSG00000064225.6	171.541	-2.16534	0.645662	-3.38633	0.00070833	0.00387243
1979	Aox3	ENSMUSG00000064294.12	16.3474	-2.15203	0.849422	-2.60462	0.0091975	0.0314749
1980	Hhip	ENSMUSG00000064325.4	170.964	-5.93533	0.628136	-7.60045	2.95113e-14	2.27574e-12
1981	Scn1a	ENSMUSG00000064329.13	123.046	-4.69629	0.757964	-5.90538	3.51835e-09	9.23778e-08
1982	NA	ENSMUSG00000064342.1	7.85077	-2.19124	0.762037	-2.76278	0.00573122	0.0215921
1983	Dhrs3	ENSMUSG00000066026.14	2556.5	-3.37208	0.446861	-7.55486	4.19315e-14	3.08764e-12
1984	Insl5	ENSMUSG00000066090.5	51.414	-4.50252	0.594336	-7.02195	2.18799e-12	1.18387e-10
1985	Kndc1	ENSMUSG00000066129.15	62.0603	-4.2286	0.701566	-5.75959	8.43185e-09	2.02644e-07
1986	Vps37b	ENSMUSG00000066278.6	831.264	-1.11564	0.264688	-4.21498	2.49799e-05	0.000227572
1987	Chrna10	ENSMUSG00000066279.3	3.0284	-2.58152	0.945678	-2.84463	0.00444632	0.017488
1988	Serpina3c	ENSMUSG00000066361.3	45.6363	-3.33102	0.838804	-4.01142	6.0354e-05	0.000484092
1989	Serpina3b	ENSMUSG00000066364.2	7.47605	-2.57498	0.976883	-3.01011	0.00261152	0.0113193
1990	Mthfs	ENSMUSG00000066442.17	37.0642	-1.91299	0.425812	-4.47014	7.81667e-06	8.3556e-05
1991	Hmgn3	ENSMUSG00000066456.14	188.842	-3.05796	0.356329	-8.5505	1.22555e-17	1.5487e-15
1992	Tecpr1	ENSMUSG00000066621.12	3312.86	-1.28031	0.234492	-5.46012	4.75817e-08	9.49066e-07
1993	Lefty2	ENSMUSG00000066652.5	3.73526	-2.62833	0.941669	-2.95711	0.00310533	0.0130552
1994	Ifi208	ENSMUSG00000066677.11	290.253	-1.71409	0.56671	-3.0418	0.00235172	0.0103863
1995	Pilrb2	ENSMUSG00000066682.11	28.5992	-1.2553	0.50205	-2.51025	0.0120645	0.0391238
1996	Zbtb16	ENSMUSG00000066687.5	181.031	-3.69279	0.713712	-5.24957	1.52458e-07	2.65439e-06
1997	Cyp2b19	ENSMUSG00000066704.6	7.75902	-3.41092	0.932463	-3.78265	0.000155168	0.00107281
1998	Fxyd6	ENSMUSG00000066705.7	59.3579	-1.34004	0.492512	-2.72932	0.00634653	0.0233884
[truncated: 2,347 more rows]
