# Supplementary material for: Requirement of DNMT1 to orchestrate epigenomic reprogramming for NPM-ALK–driven lymphomagenesis
Source: Life Sci Alliance. 2020 Dec 11;4(2):e202000794. doi: 10.26508/lsa.202000794 (PMC7768196; doi:10.26508/lsa.202000794)
Supplement: Supplementary file 3 [file LSA-2020-00794_TableS3.xlsx]

## Sheet: Sheet1
	Table S3. Differential expression analysis between simulated and real bulk data reveals genes that are significantly downregulated in ALK versus simulated ALK data. Columns show differential gene expression of bulk data versus individually simulated data of Ctrl, KO, ALK and ALKKO RNA-seq data.
Gene ID	Ctrl_vs_simCtrl	KO_vs_simKO	ALK_vs_simALK	ALKKO_vs_simALKKO
BB031773	-0.139081	0.525354	-7.3239	0.229216
Fabp3	0.745432	2.99626	-6.52778	-0.299029
Slc6a19	-0.784857	-0.0711322	-5.96462	-1.14422
Cd6	0.335609	0.088276	-5.48956	0.222207
Lsp1	-0.246089	-0.0954899	-5.16567	-0.533014
Cd69	-0.638869	-1.38216	-5.15004	-0.452587
Pglyrp1	-1.14688	-0.320438	-4.67735	-1.2059
Gbp8	-0.0621971	0.00549437	-4.64586	-0.308566
BC035044	-1.41345	-0.526137	-4.48088	-0.7747
Rasgrp1	0.149936	0.0843239	-4.44879	0.0403529
Clec2d	-0.944142	-1.05051	-4.33864	-1.16975
Itga4	0.183569	0.752886	-4.27446	0.689819
Art1	-1.22979	-0.847888	-4.26727	-1.12876
Nr4a1	0.989043	0.557297	-4.13979	0.585784
Pth	5.16617	4.01489	-4.12304	-0.33919
Traf1	0.101189	0.635194	-4.09651	0.214296
Il21r	-0.78072	-0.72563	-3.99491	-0.811133
Gpr183	-1.0542	-0.963852	-3.91997	-0.940764
Eci1	0.211714	1.00353	-3.77295	-0.0893971
Pgam2	0.609243	4.32737	-3.75967	0.582109
S1pr4	-0.911085	-0.703713	-3.75388	-0.985051
Wdr78	0.318179	0.294039	-3.7201	0.012247
Pdcd1	0.523176	0.533585	-3.66352	0.789701
Rab19	-0.992207	-1.03624	-3.66049	-0.580385
Tdrd5	-0.953791	-0.797477	-3.62746	-0.904877
Slfn2	-1.24472	-0.965326	-3.58187	-1.33662
AW112010	-1.00716	-0.234985	-3.58144	-0.665564
Ifit1bl1	0.370604	2.03498	-3.47053	1.9902
Klf4	-0.539286	-0.777229	-3.42534	-0.306053
Fbxo27	-1.06526	0.185585	-3.41261	1.07188
Tbxa2r	-0.837717	-1.29011	-3.40061	-1.27555
Dhrs3	0.152604	0.0638744	-3.39345	-0.387452
Apoa2	-2.8862	1.58499	-3.17261	-0.000191491
Rasl11b	-0.766822	-1.18501	-3.16394	-1.30615
Tec	-0.221931	-0.000930182	-3.14289	-0.334501
Rrad	-1.41088	-0.898986	-3.12612	-1.44877
Gpr162	-0.129873	-0.365464	-3.05359	-0.570414
Bin1	-0.539404	-0.529902	-3.04822	-0.916057
Isg15	-0.875331	-1.22479	-3.04091	-0.977979
